# Supplementary material for: Bis-imidazolium and benzimidazolium based gemini-type ionic liquids structure: synthesis and antibacterial evaluation
Source: Royal Society of Chemistry journal article supplement (doi:10.1039/c5ra13629f), 2015-01-01

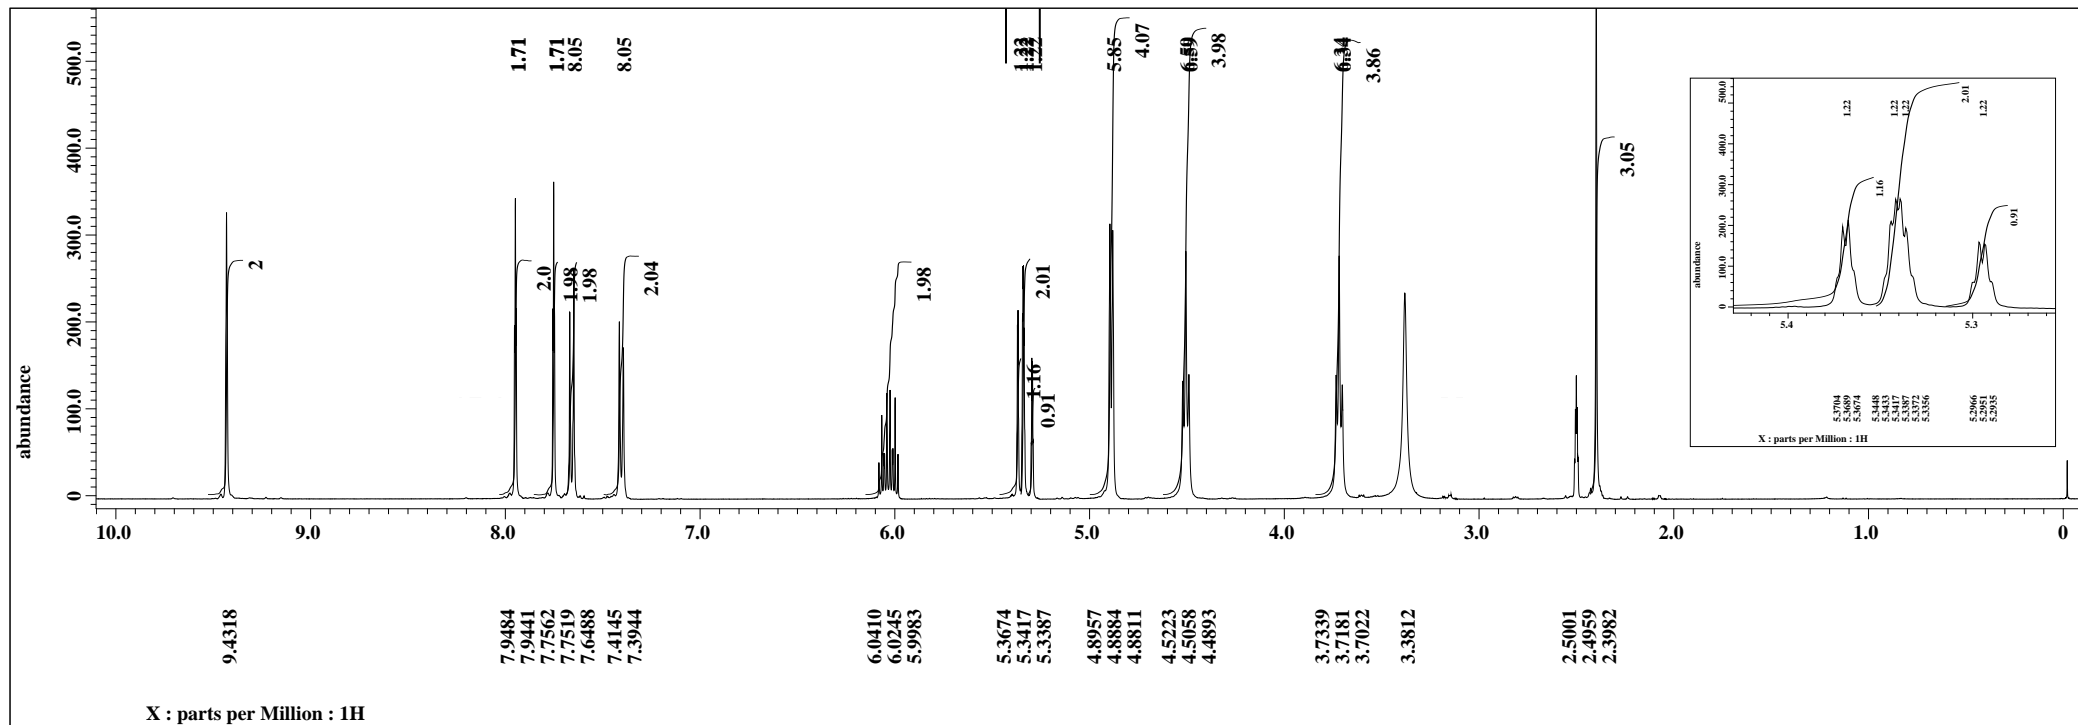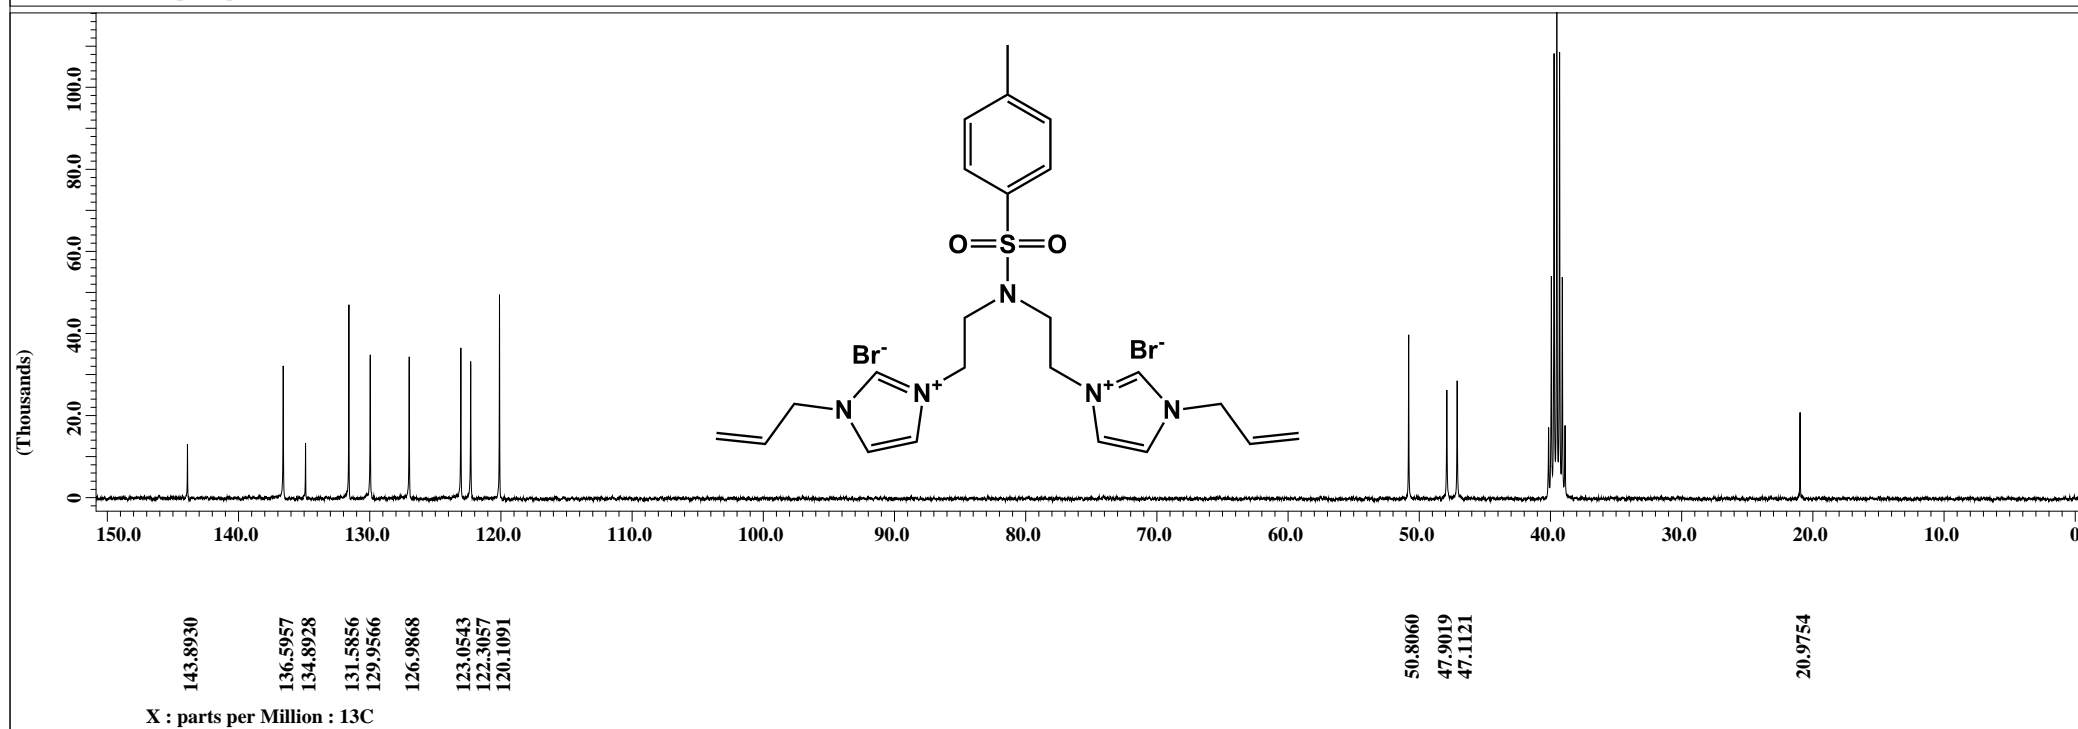

Figure S2-<sup>1</sup>H & <sup>13</sup>C-NMR of IL-5b (400 MHz, DMSO-*d*<sub>6</sub>)

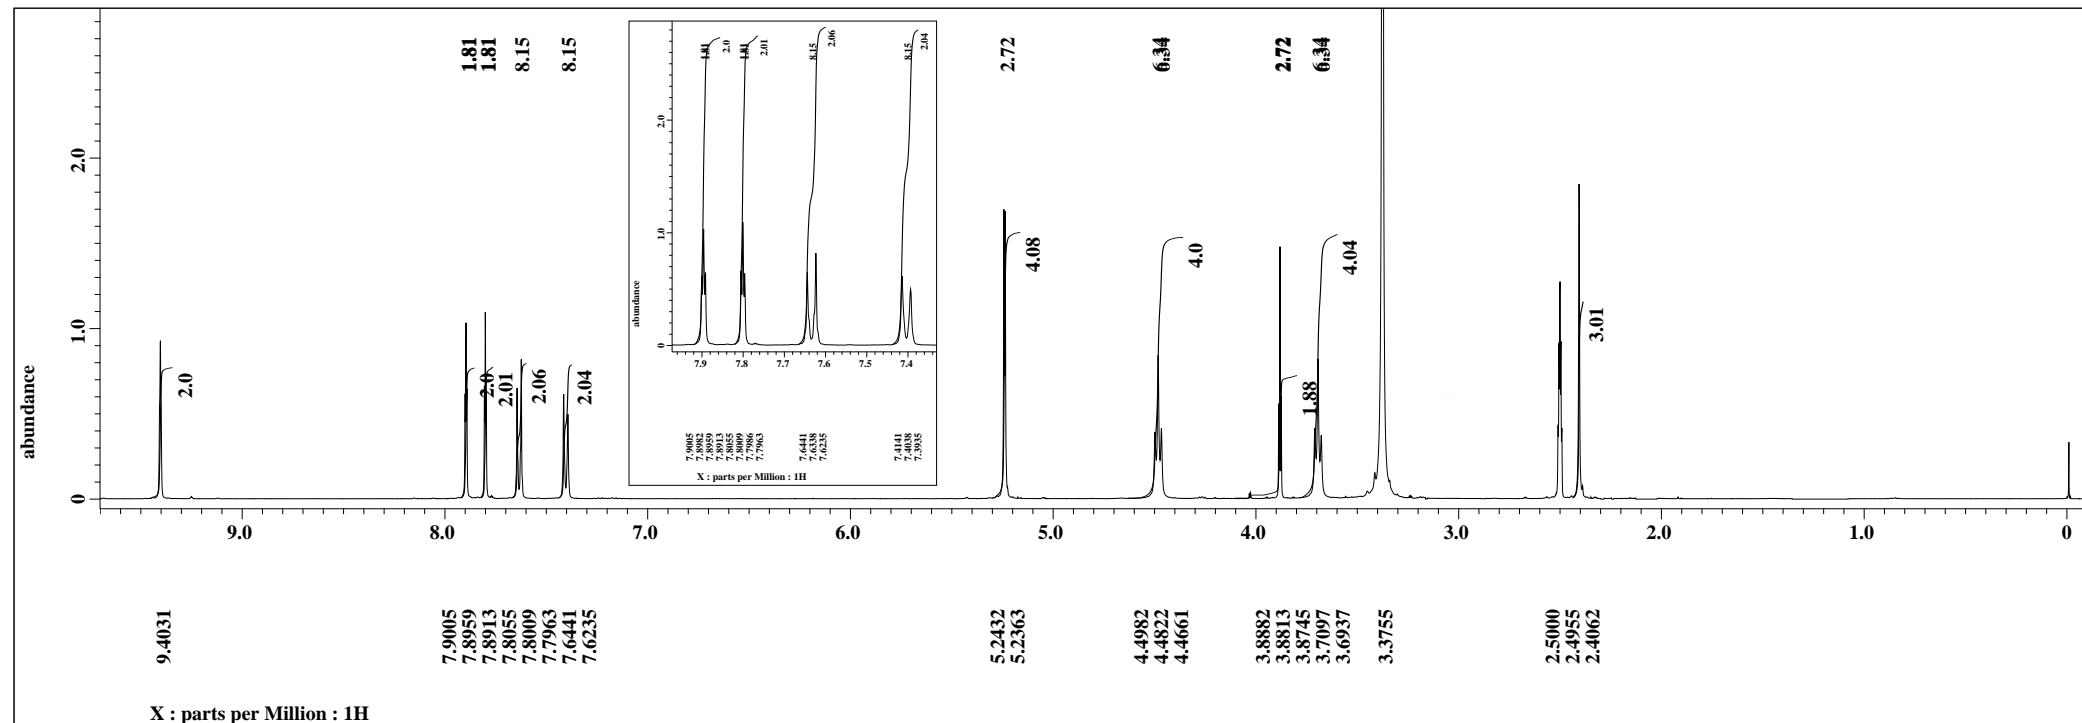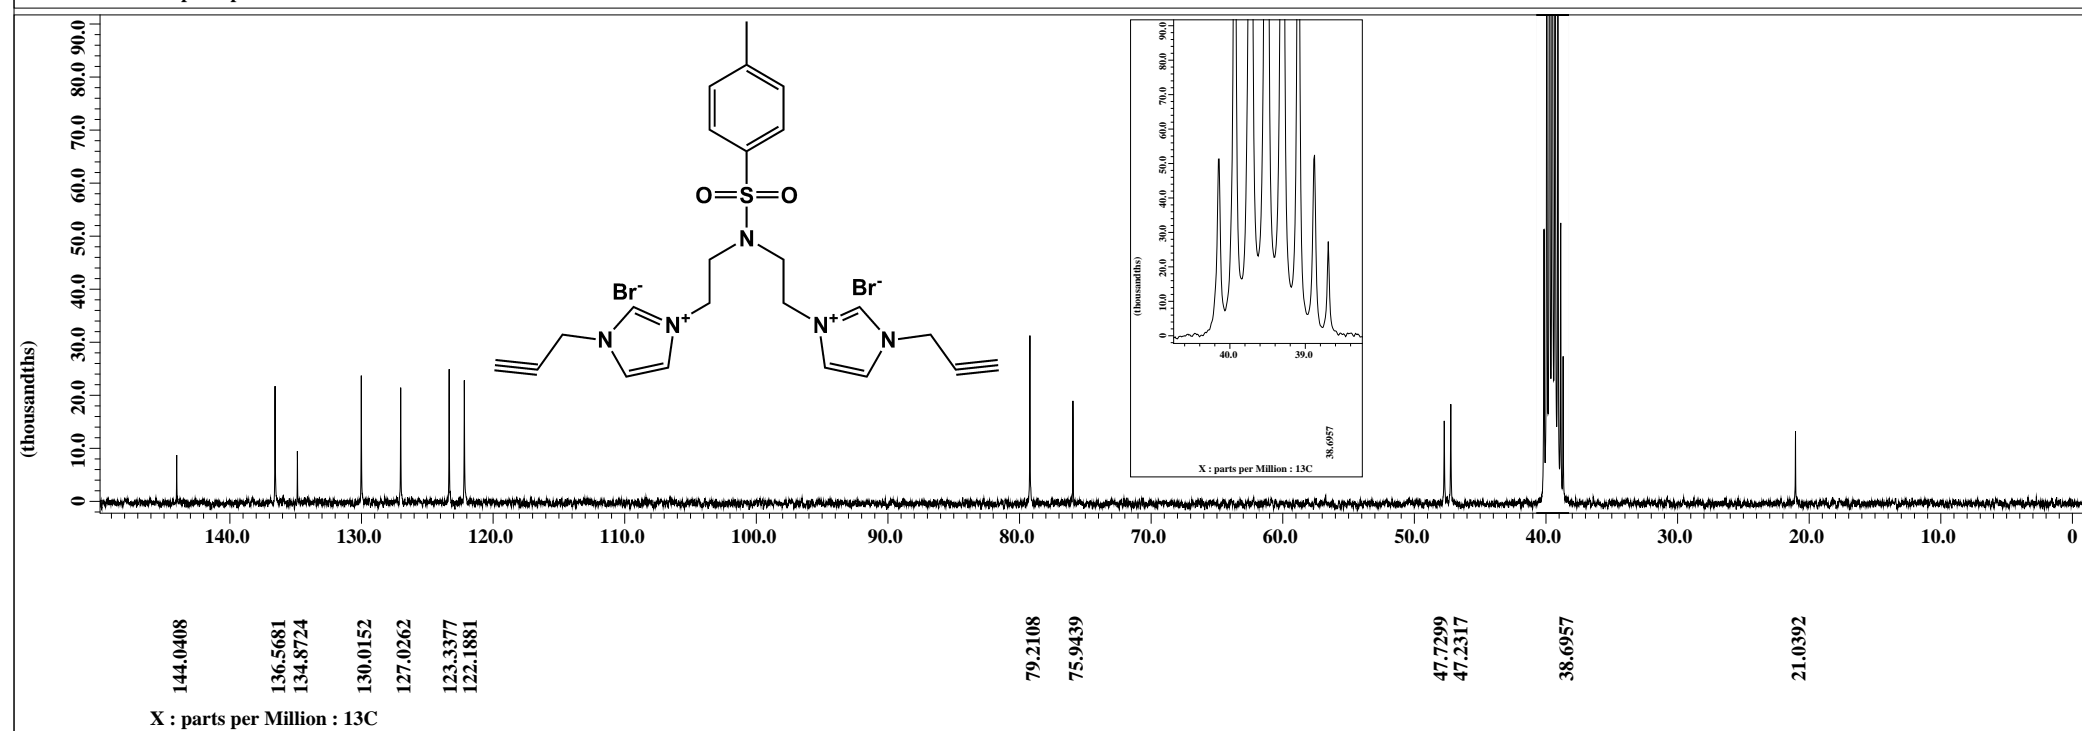

Figure S3-<sup>13</sup>C-NMR PENDANT of IL-5b (100 MHz, DMSO-*d*<sub>6</sub>)

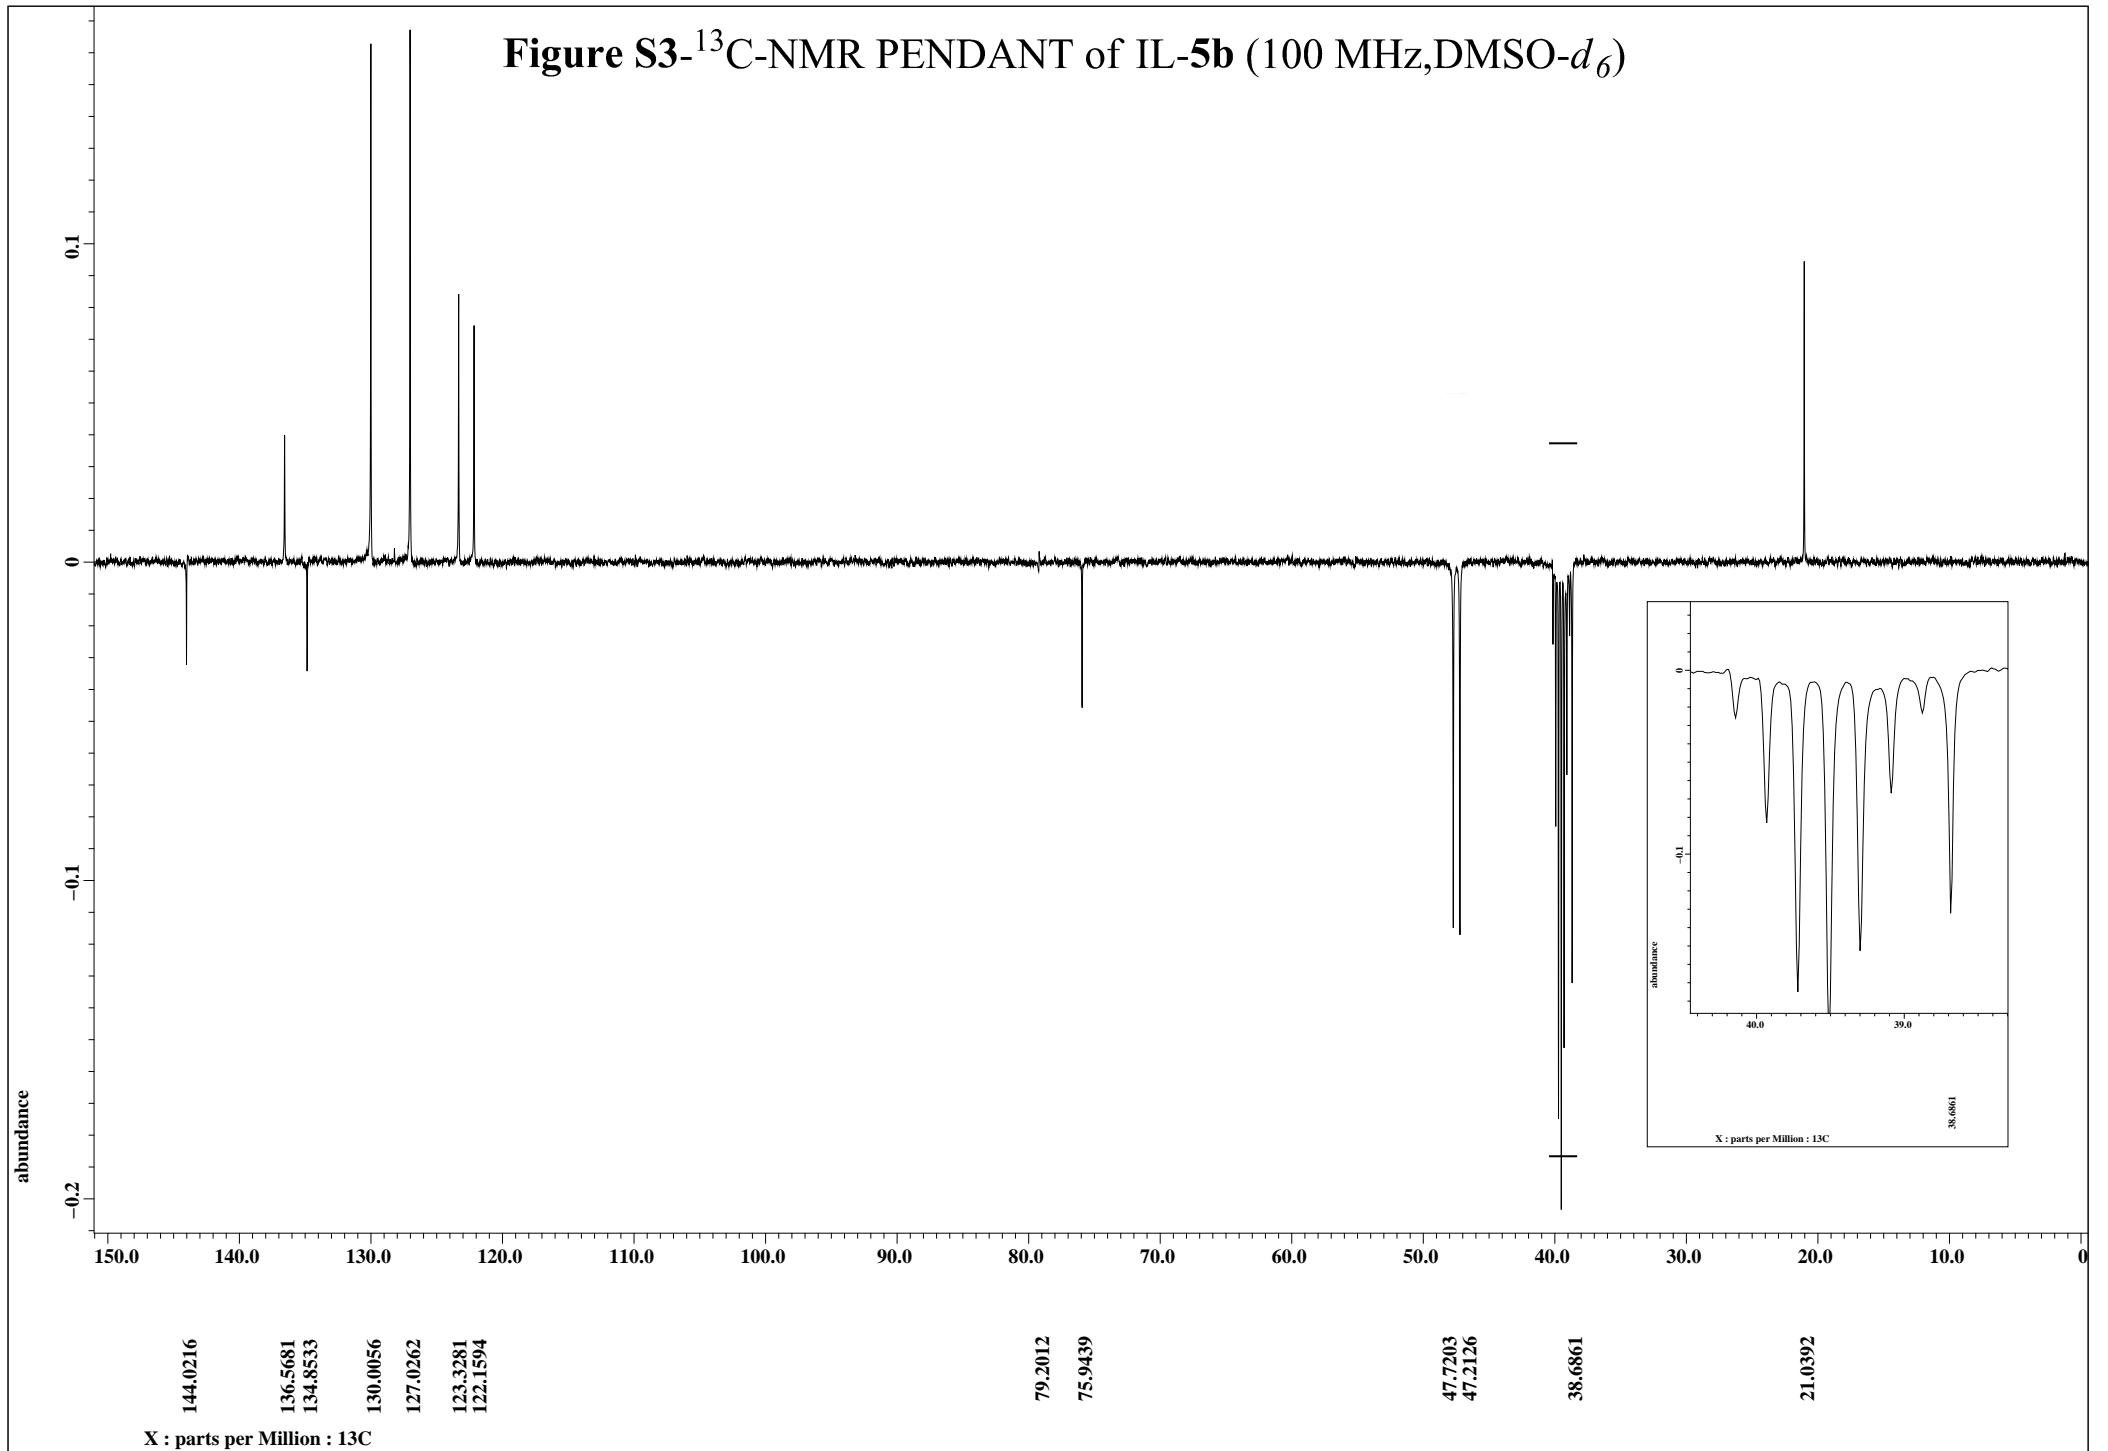

**Figure S4-<sup>1</sup>H & <sup>13</sup>C-NMR of IL-5c (400 MHz, DMSO-*d*<sub>6</sub>)**

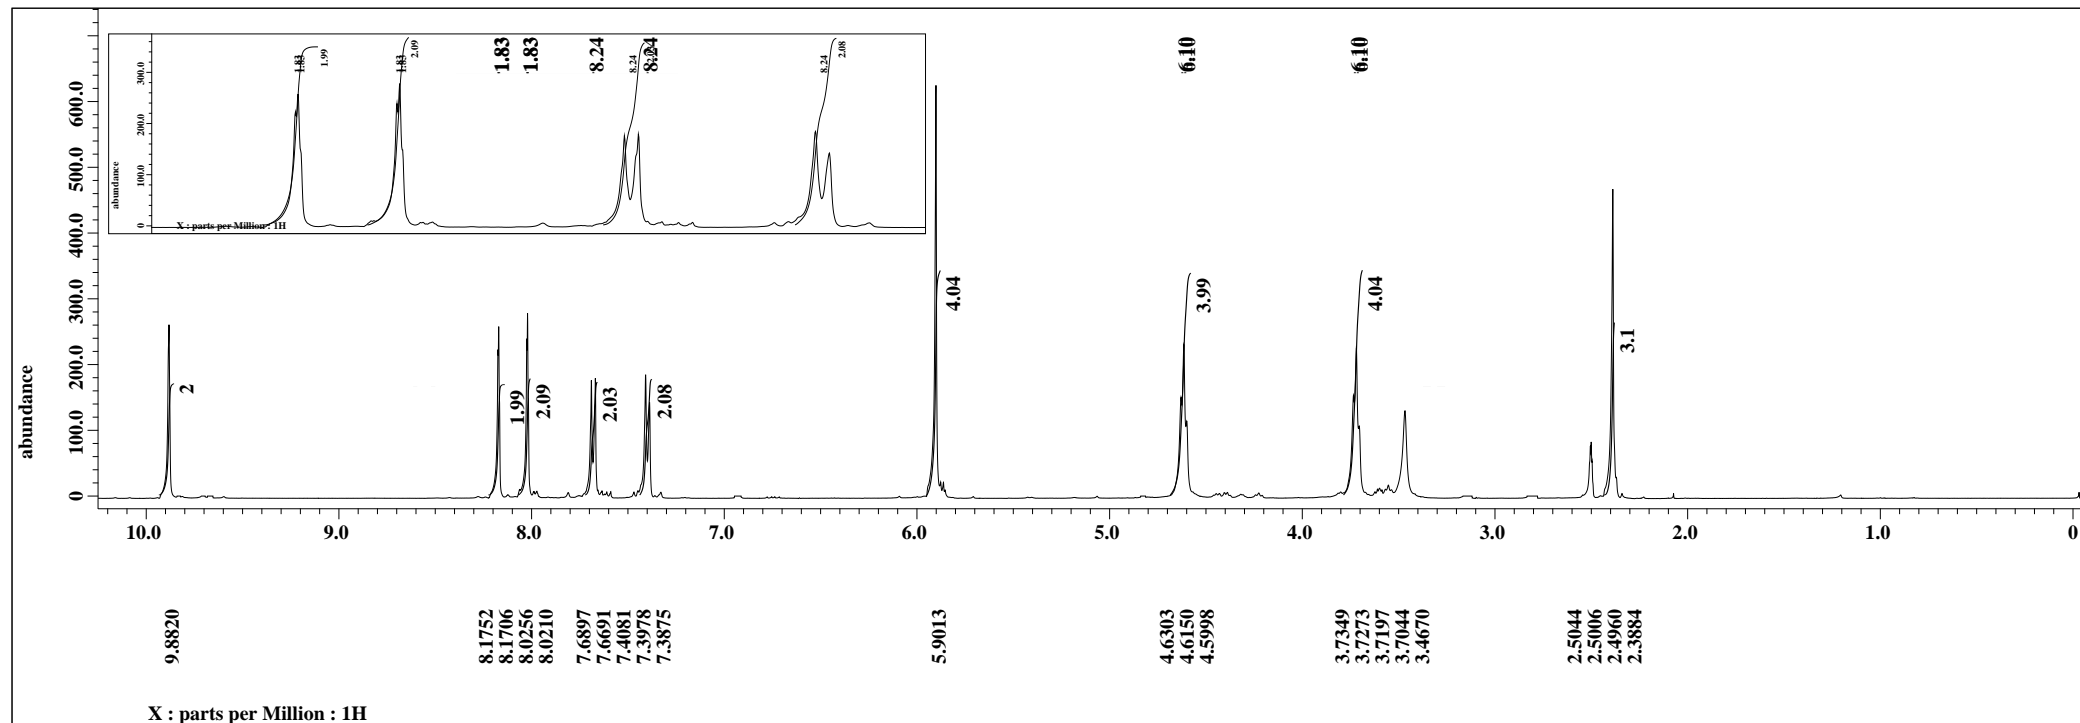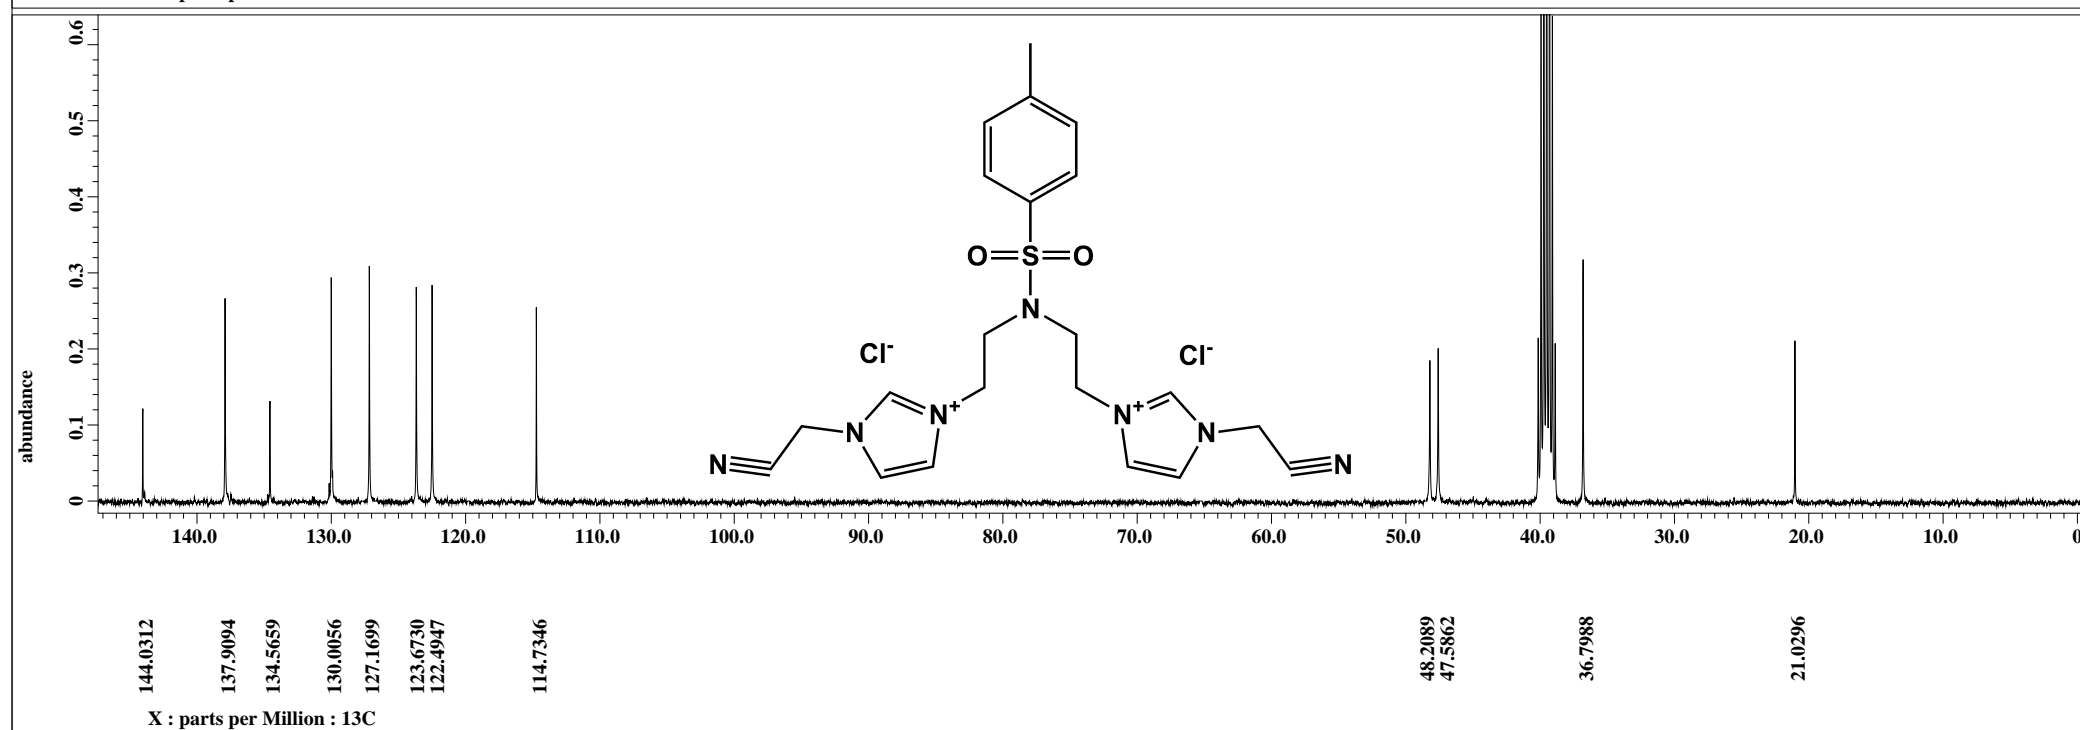

**Figure S5-<sup>1</sup>H & <sup>13</sup>C-NMR of IL-5d (400 MHz, DMSO-*d*<sub>6</sub>)**

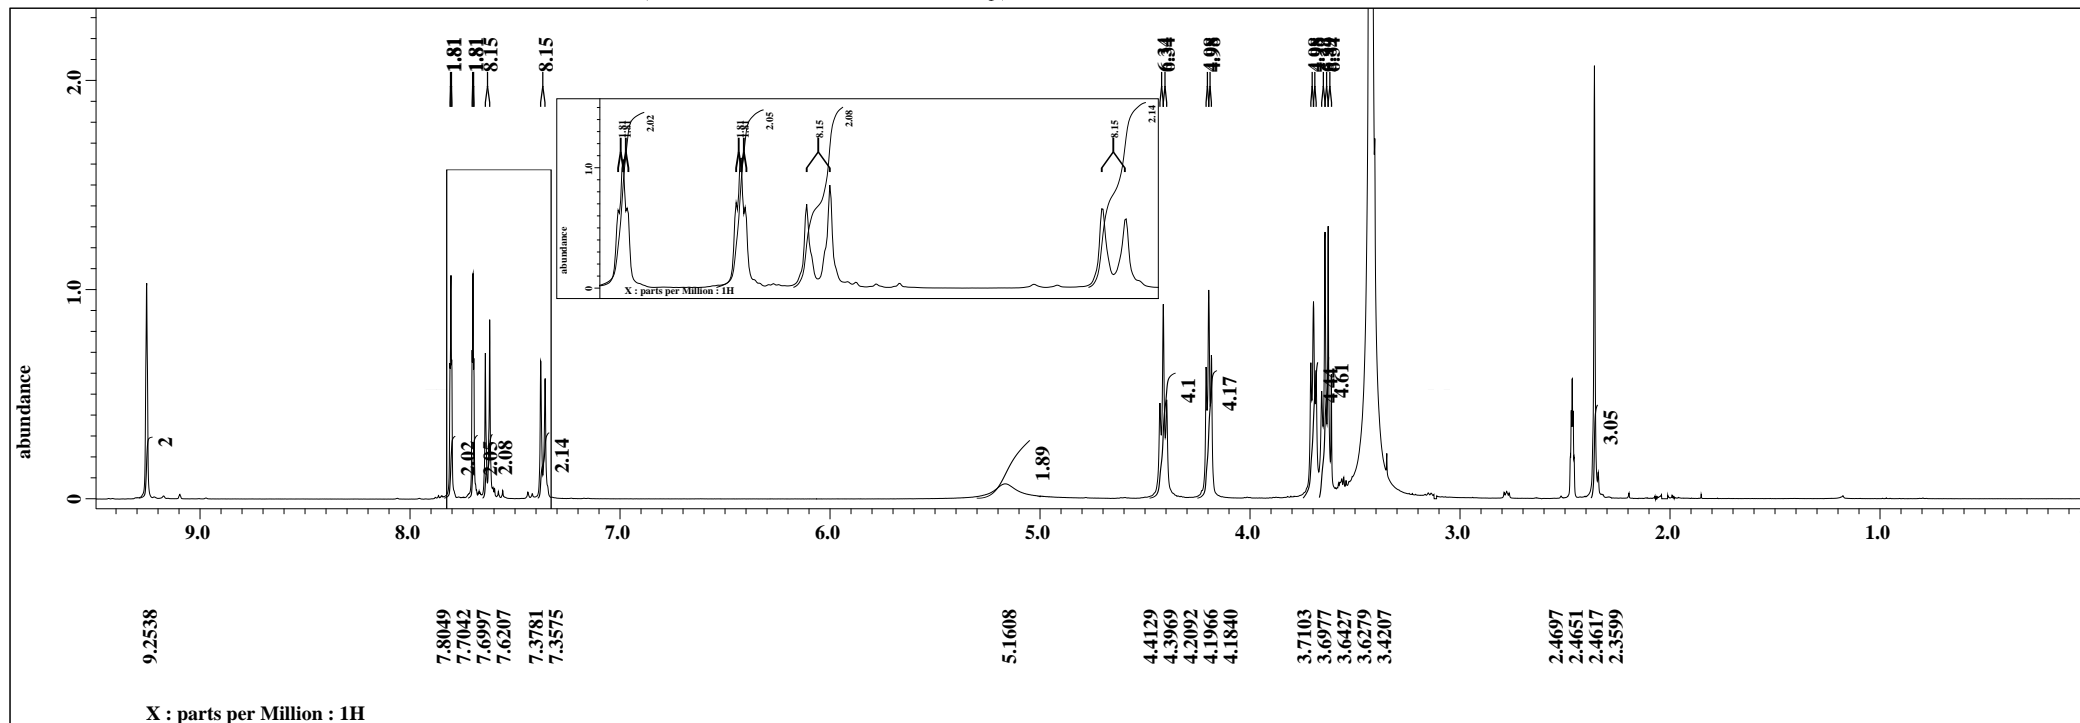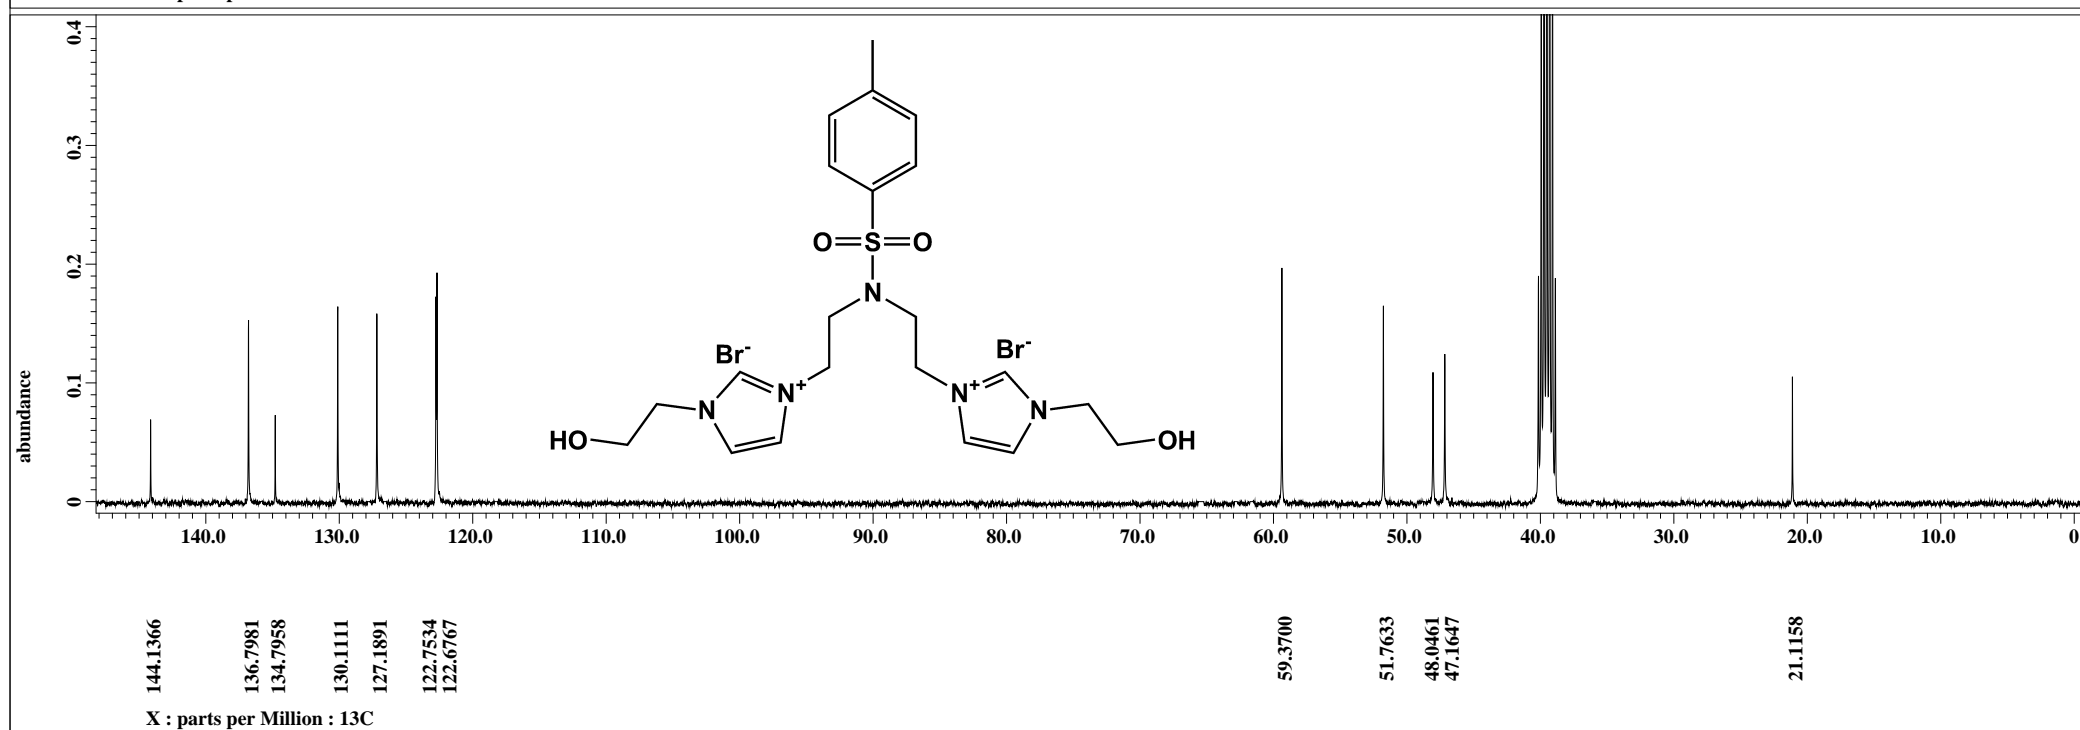

**Figure S6-**<sup>13</sup>C-NMR PENDANT of IL-5d (100 MHz, DMSO-*d*<sub>6</sub>)

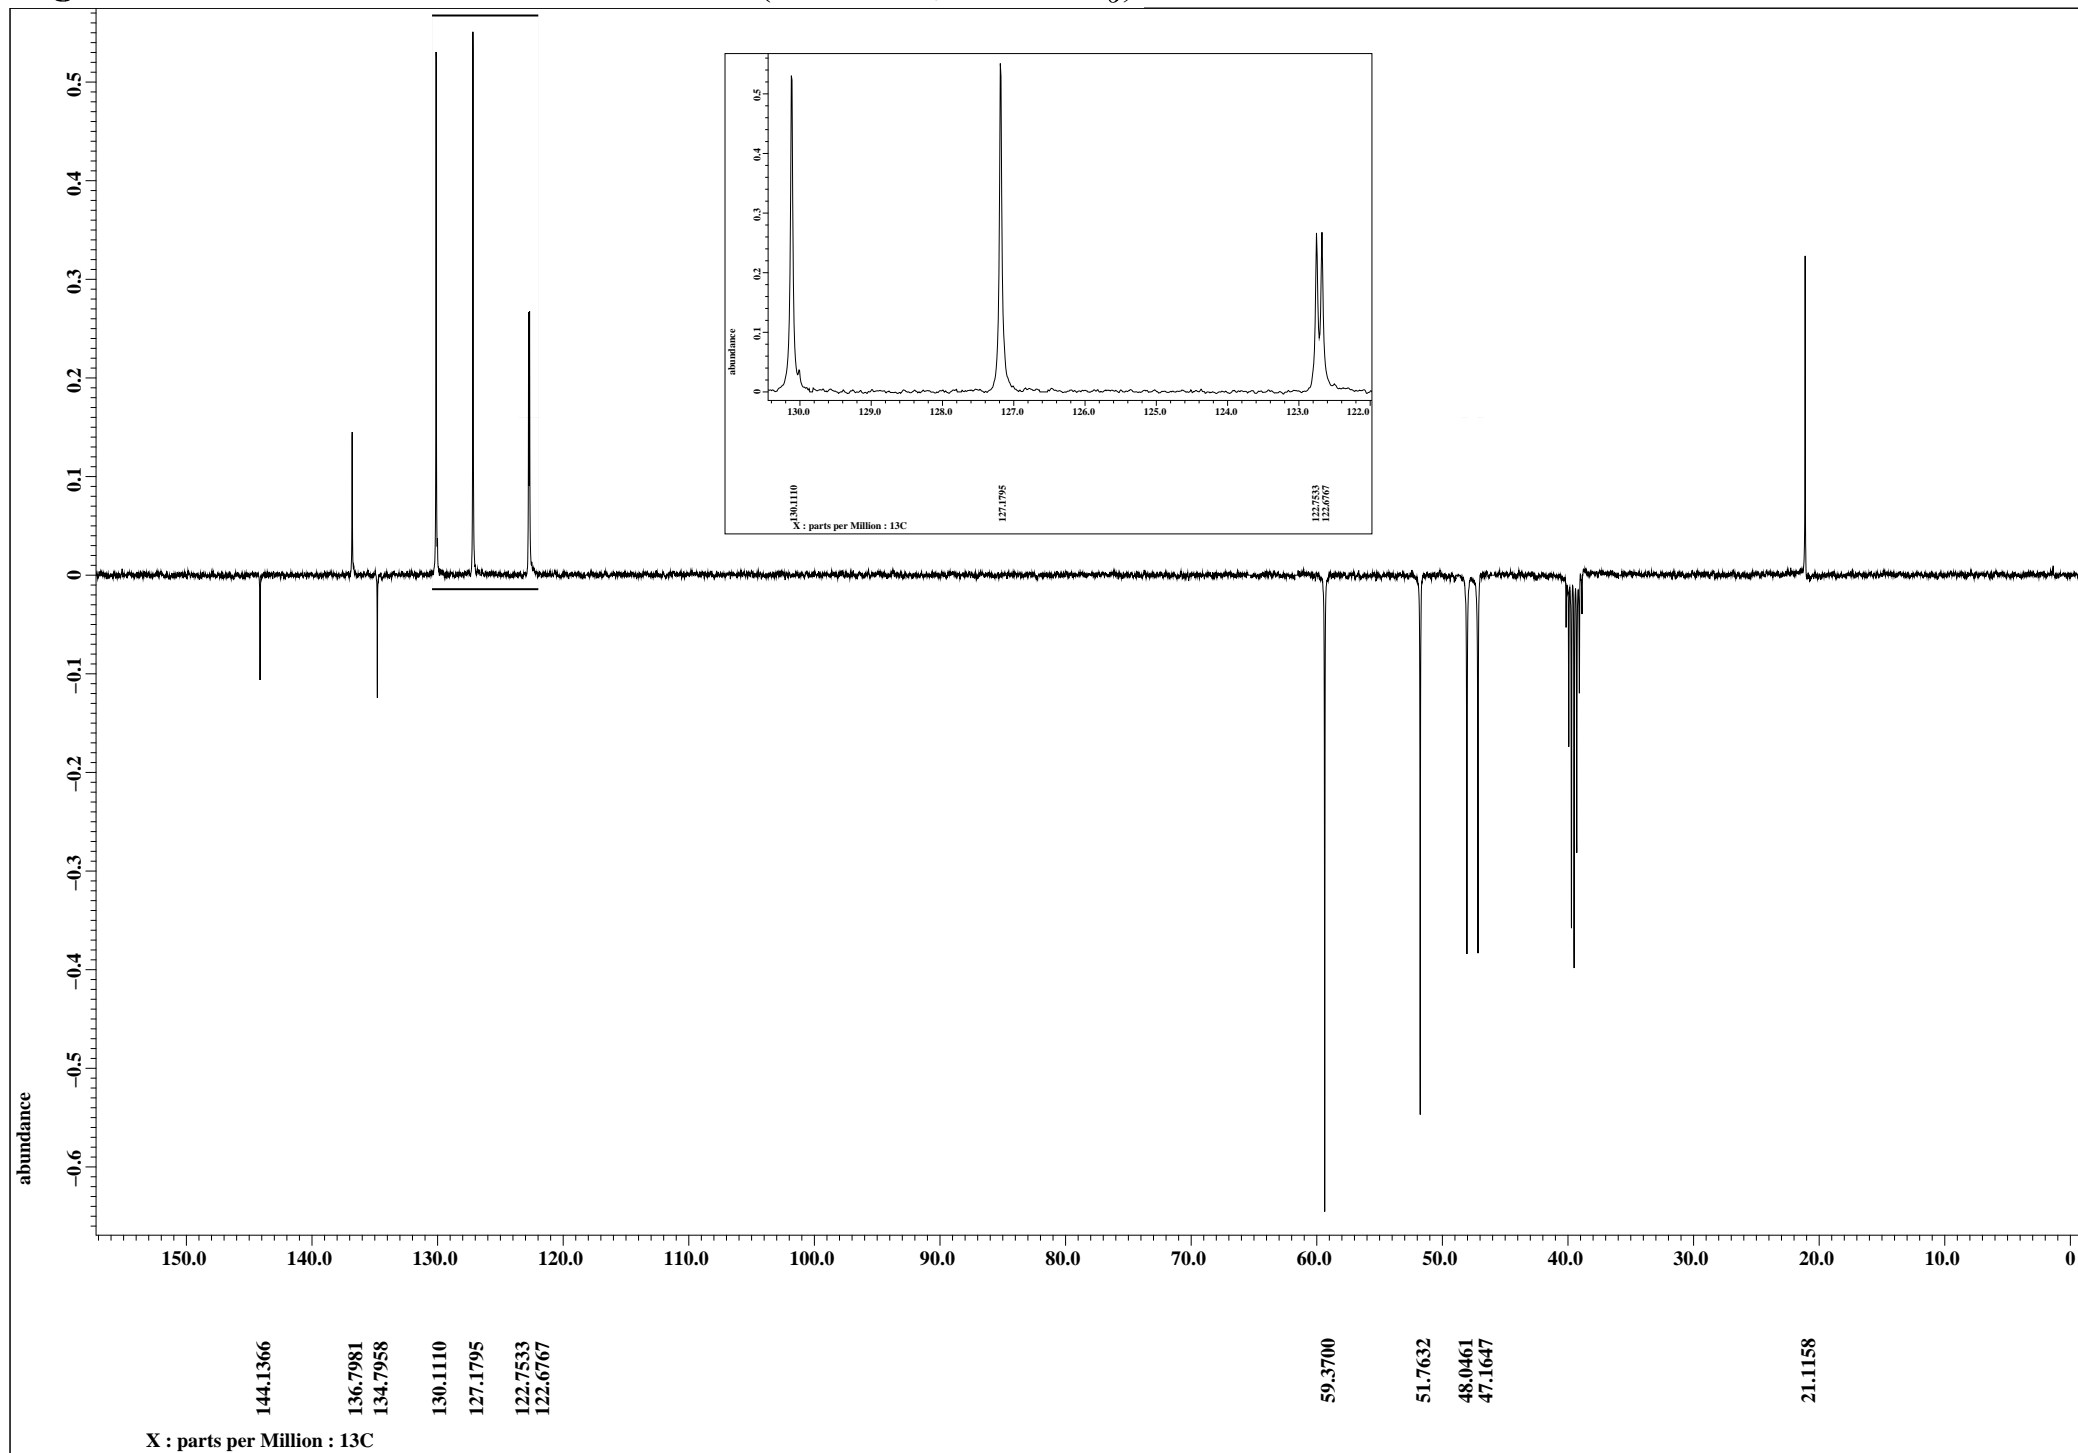

**Figure S7-<sup>1</sup>H & <sup>13</sup>C-NMR of IL-5e (400 MHz, DMSO-*d*<sub>6</sub>)**

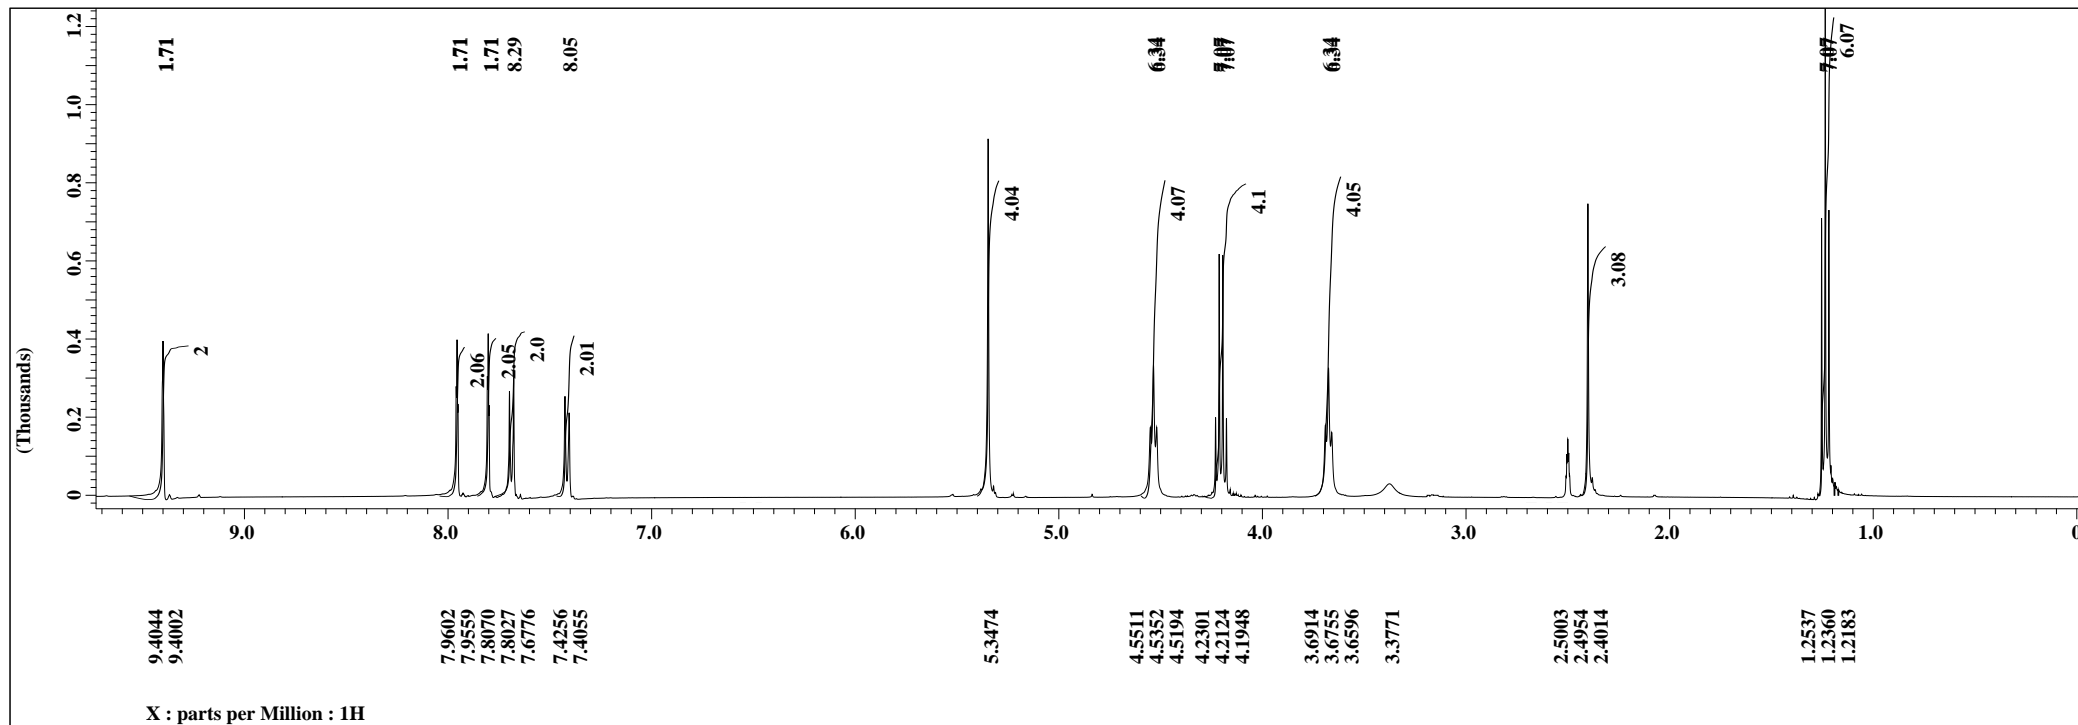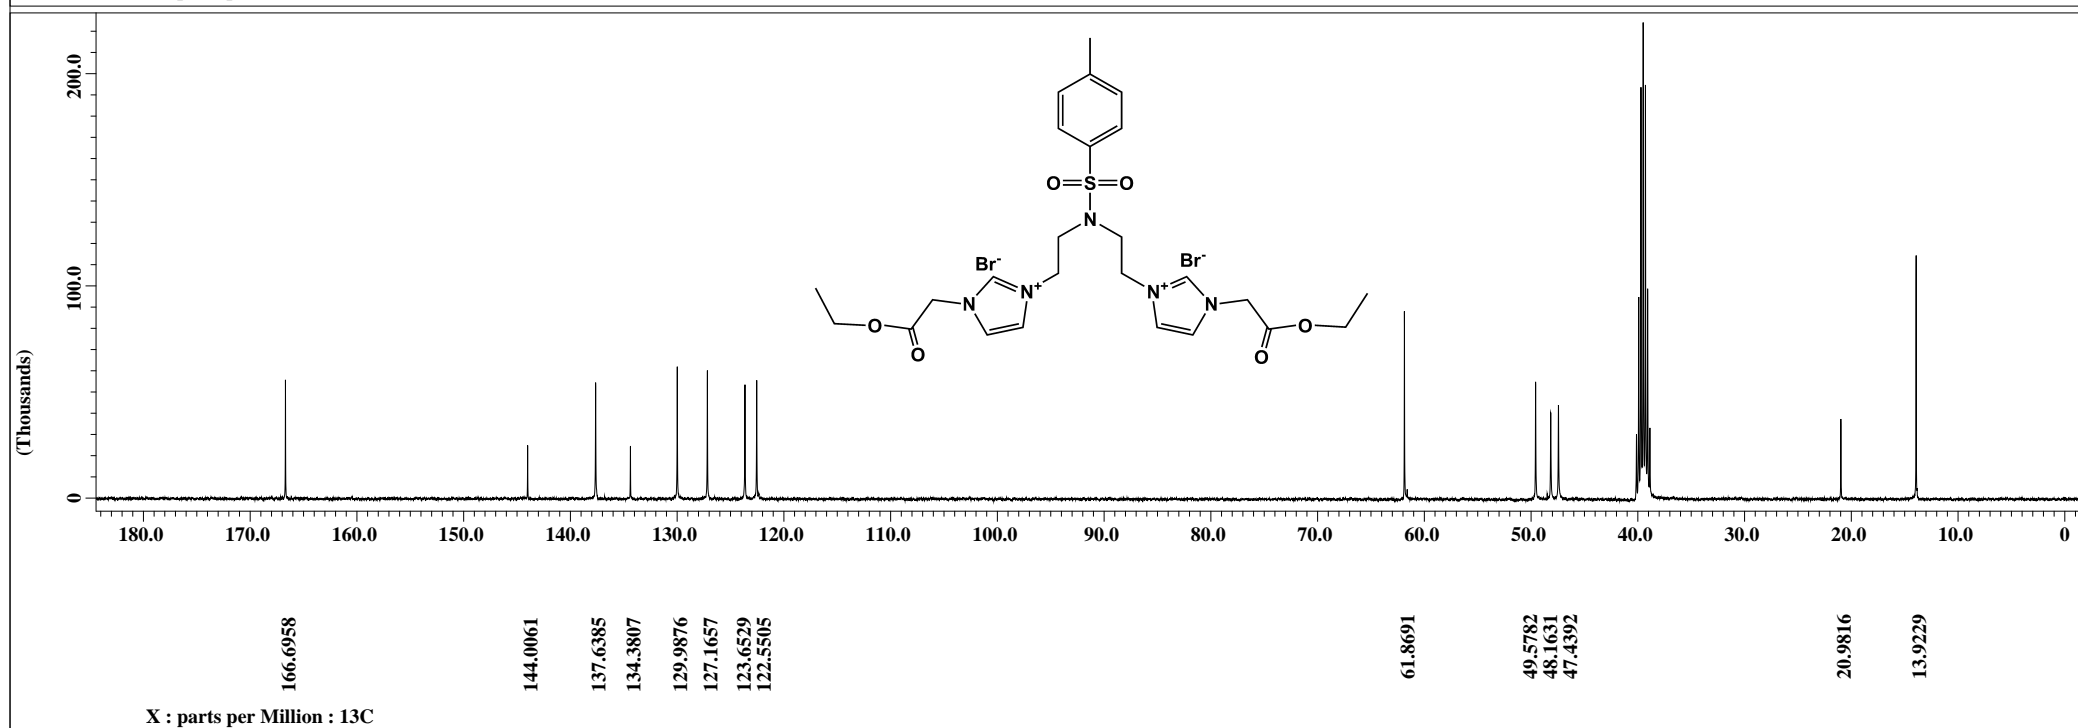

**Figure S8**-<sup>1</sup>H & <sup>13</sup>C-NMR of IL-5f (400 MHz, DMSO-*d*<sub>6</sub>)

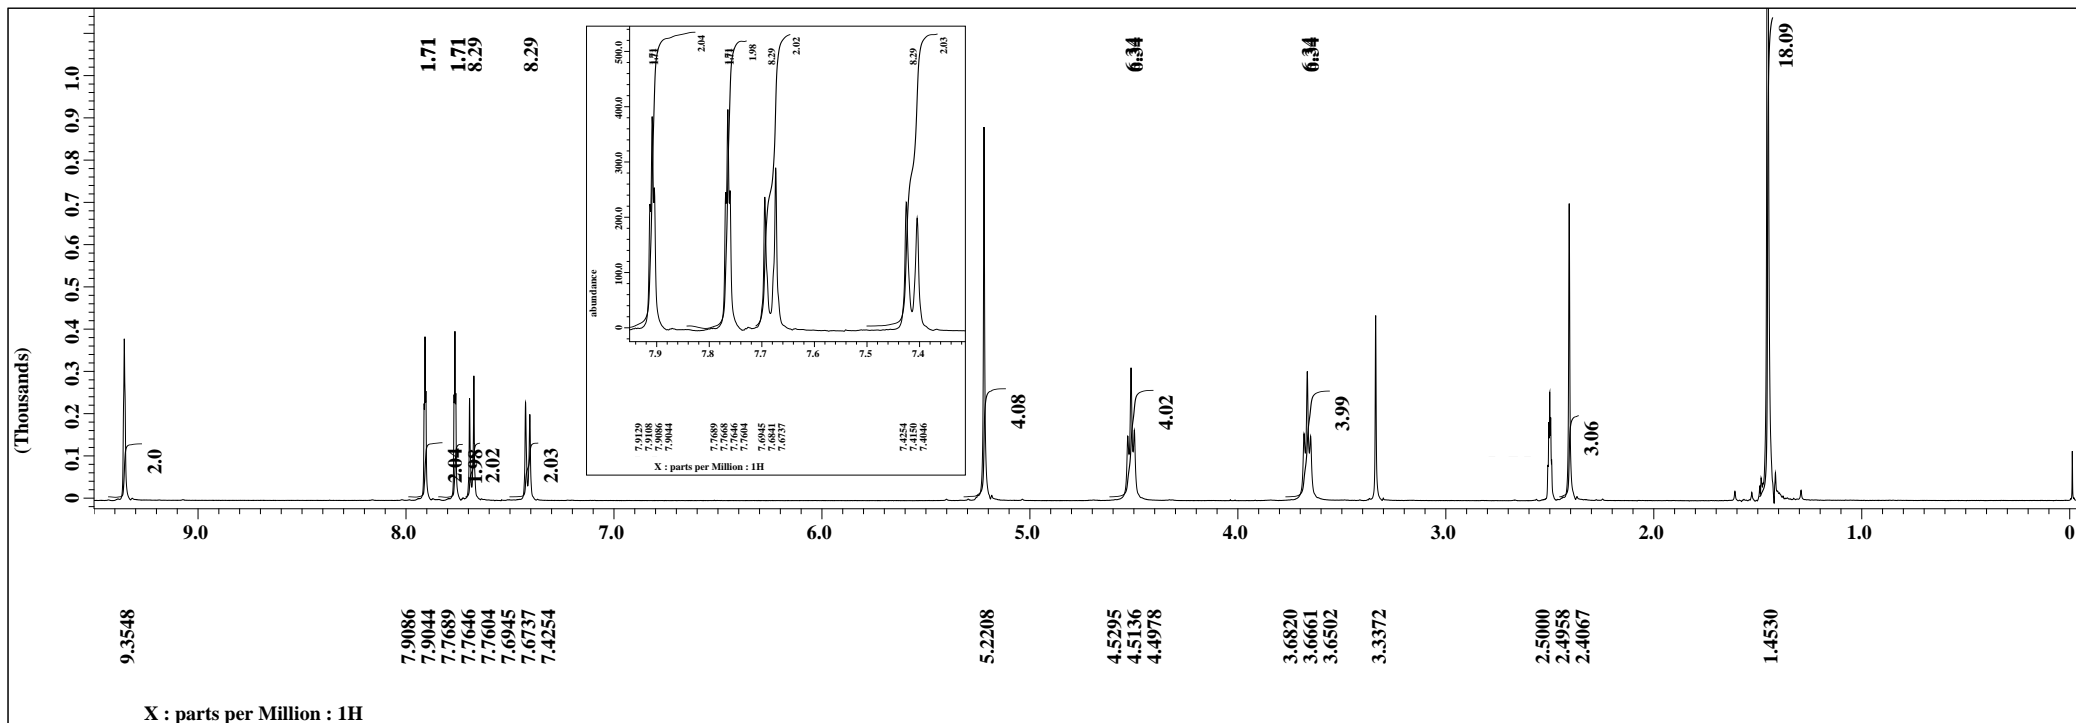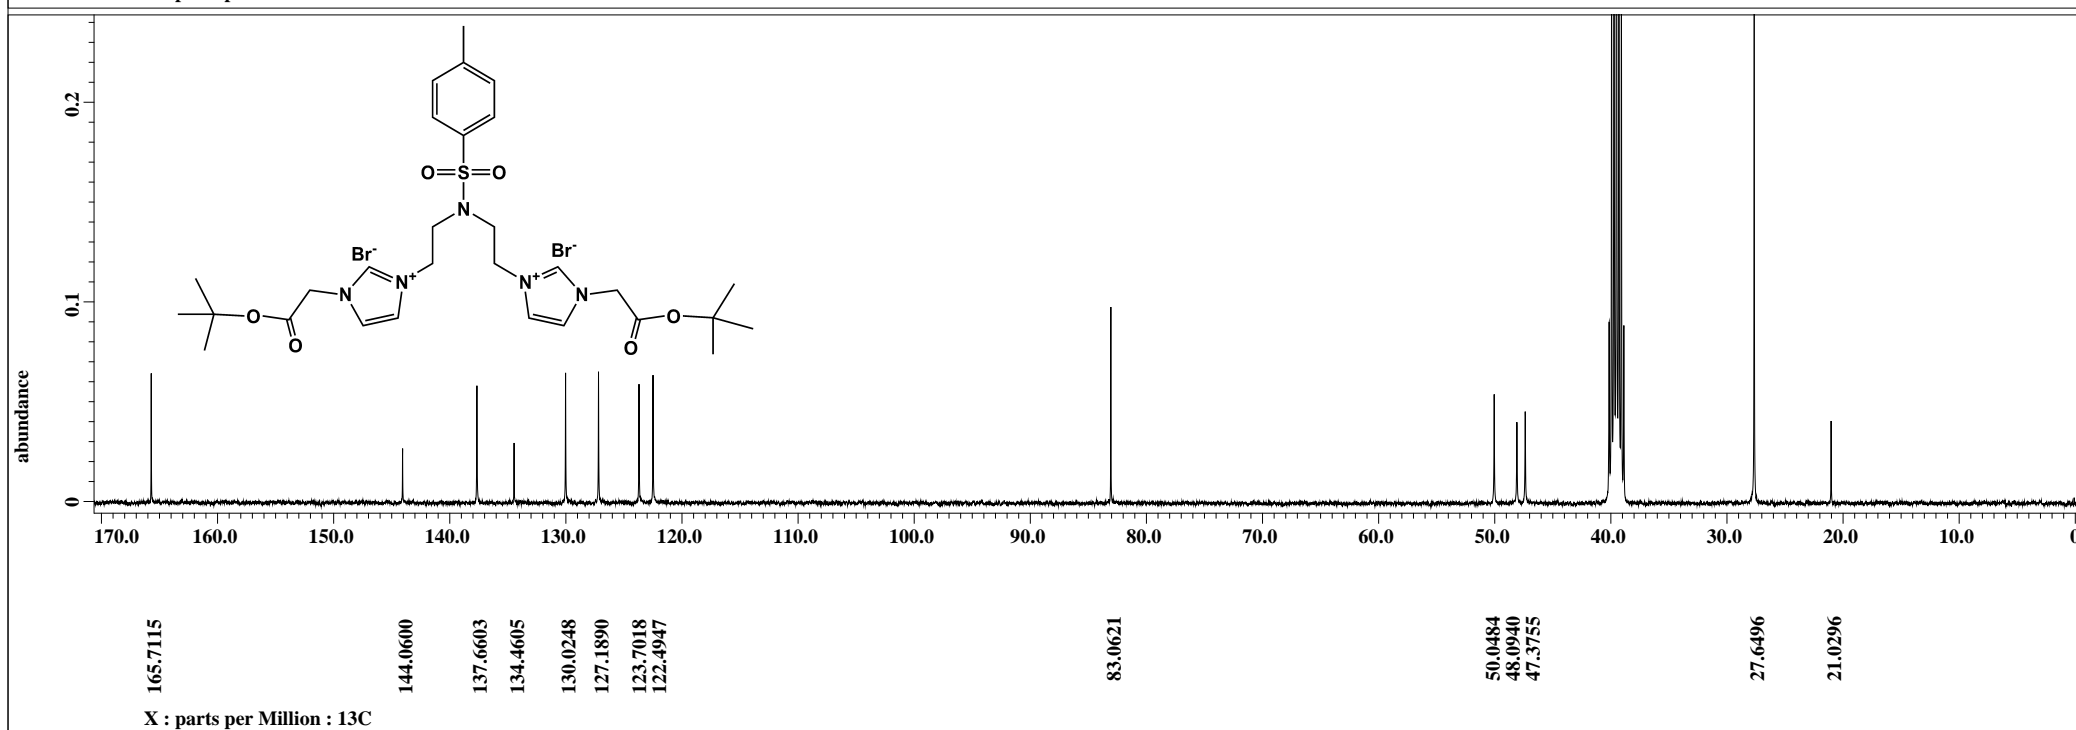



Figure S9-<sup>1</sup>H & <sup>13</sup>C-NMR of IL-6a (400 MHz, DMSO-*d*<sub>6</sub>)

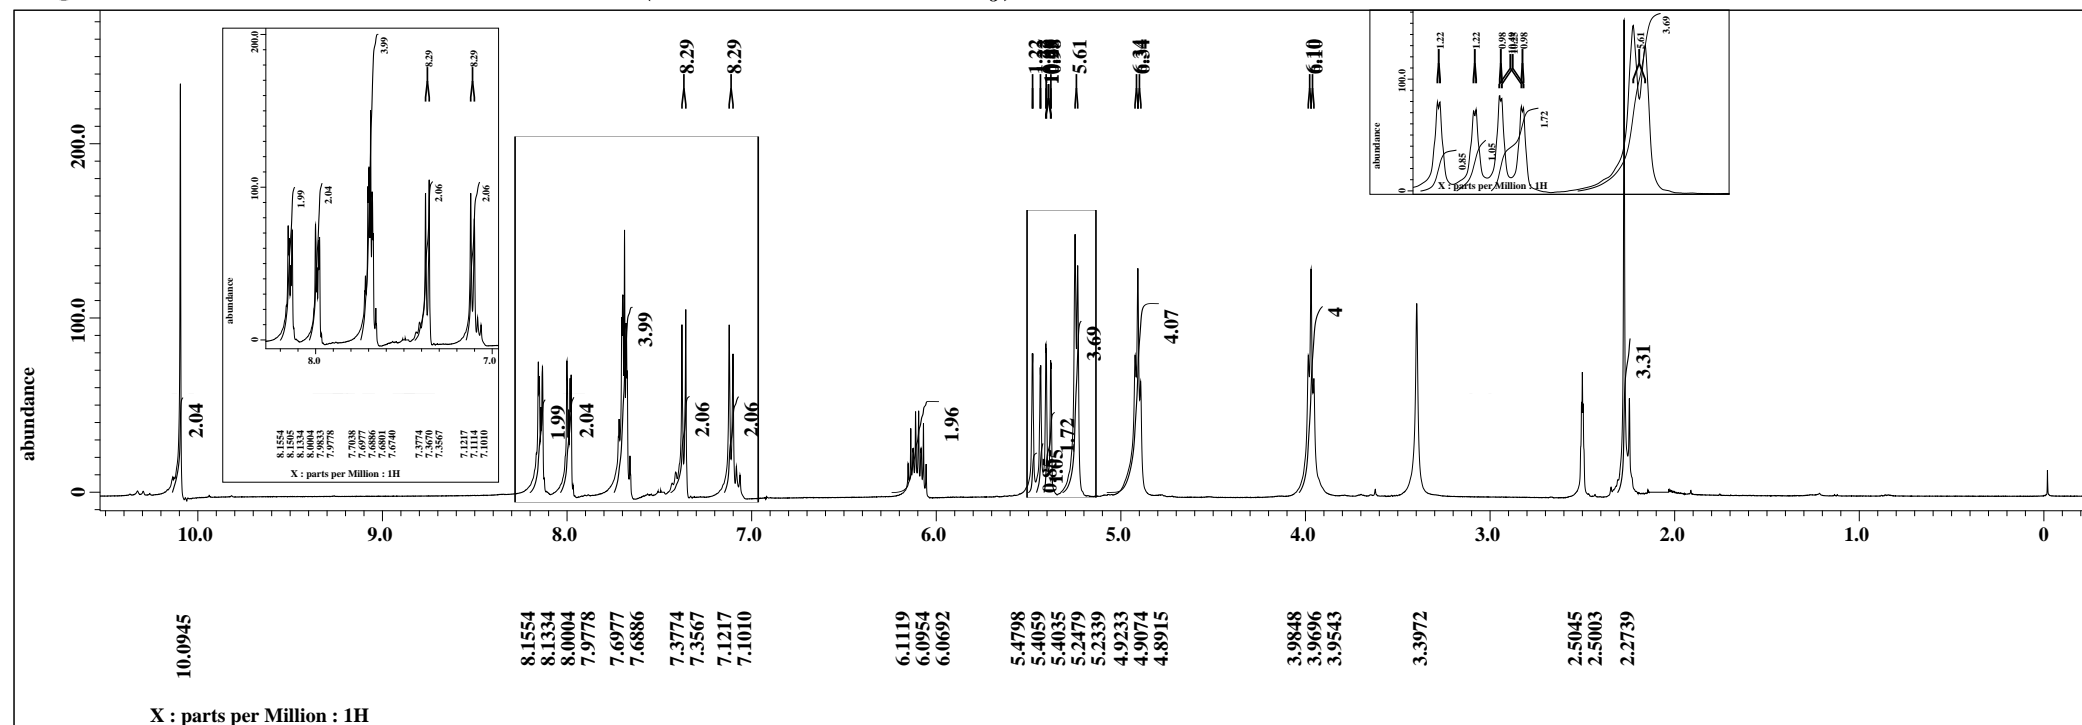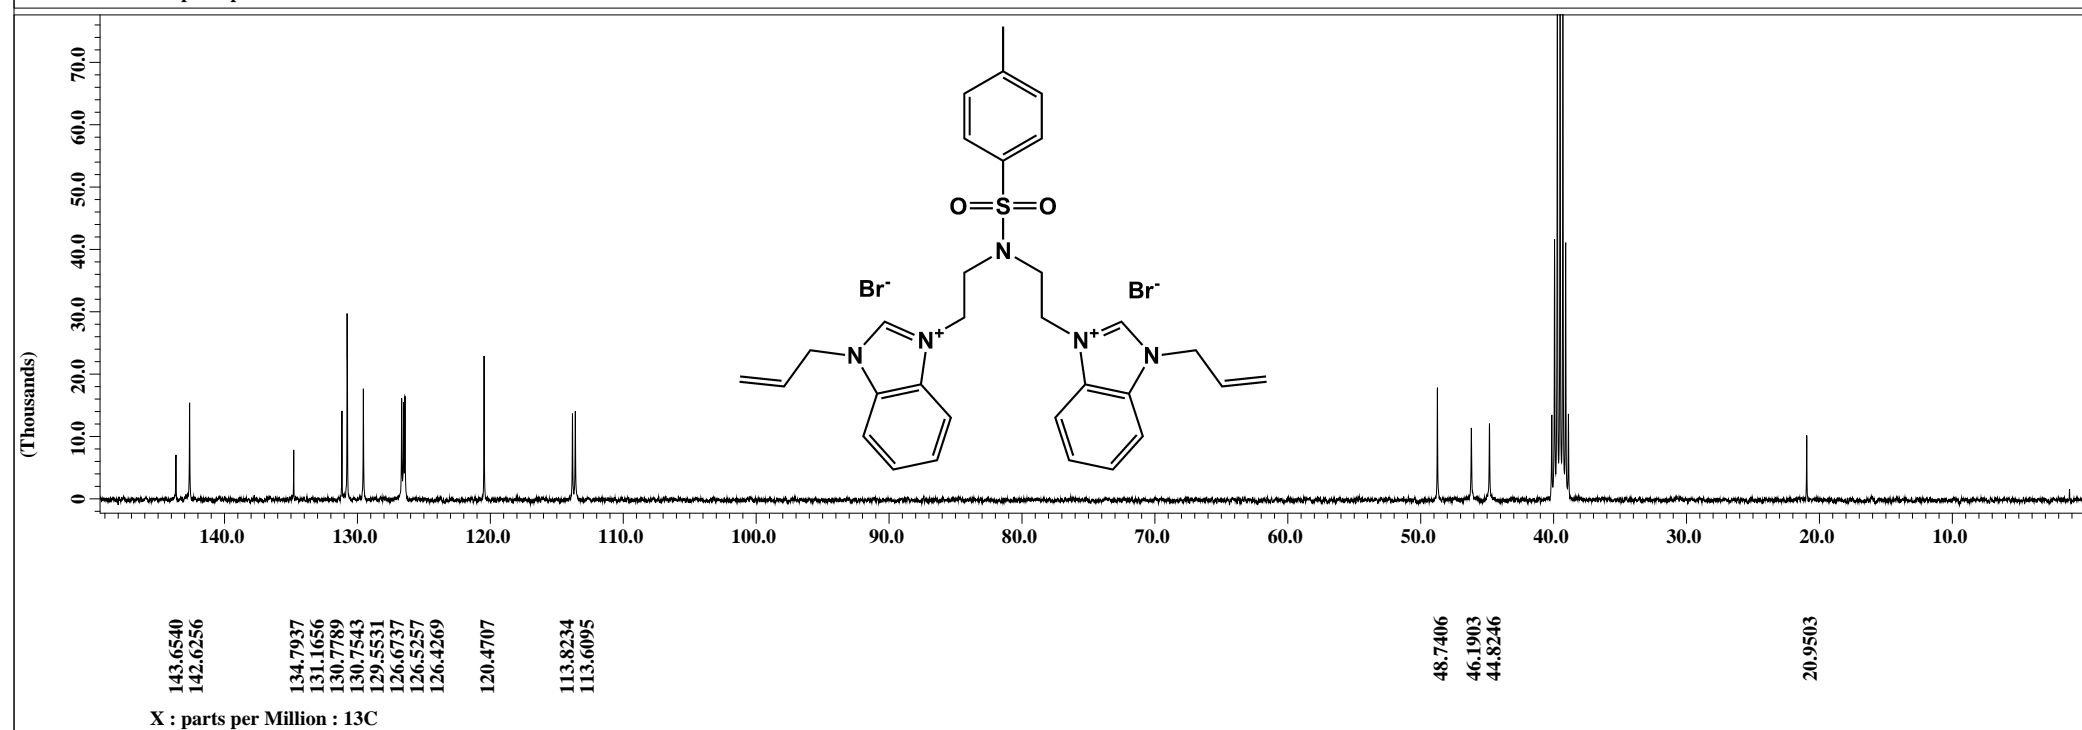

Figure S10-<sup>13</sup>C-NMR PENDANT of IL-6a (100 MHz, DMSO-*d*<sub>6</sub>)

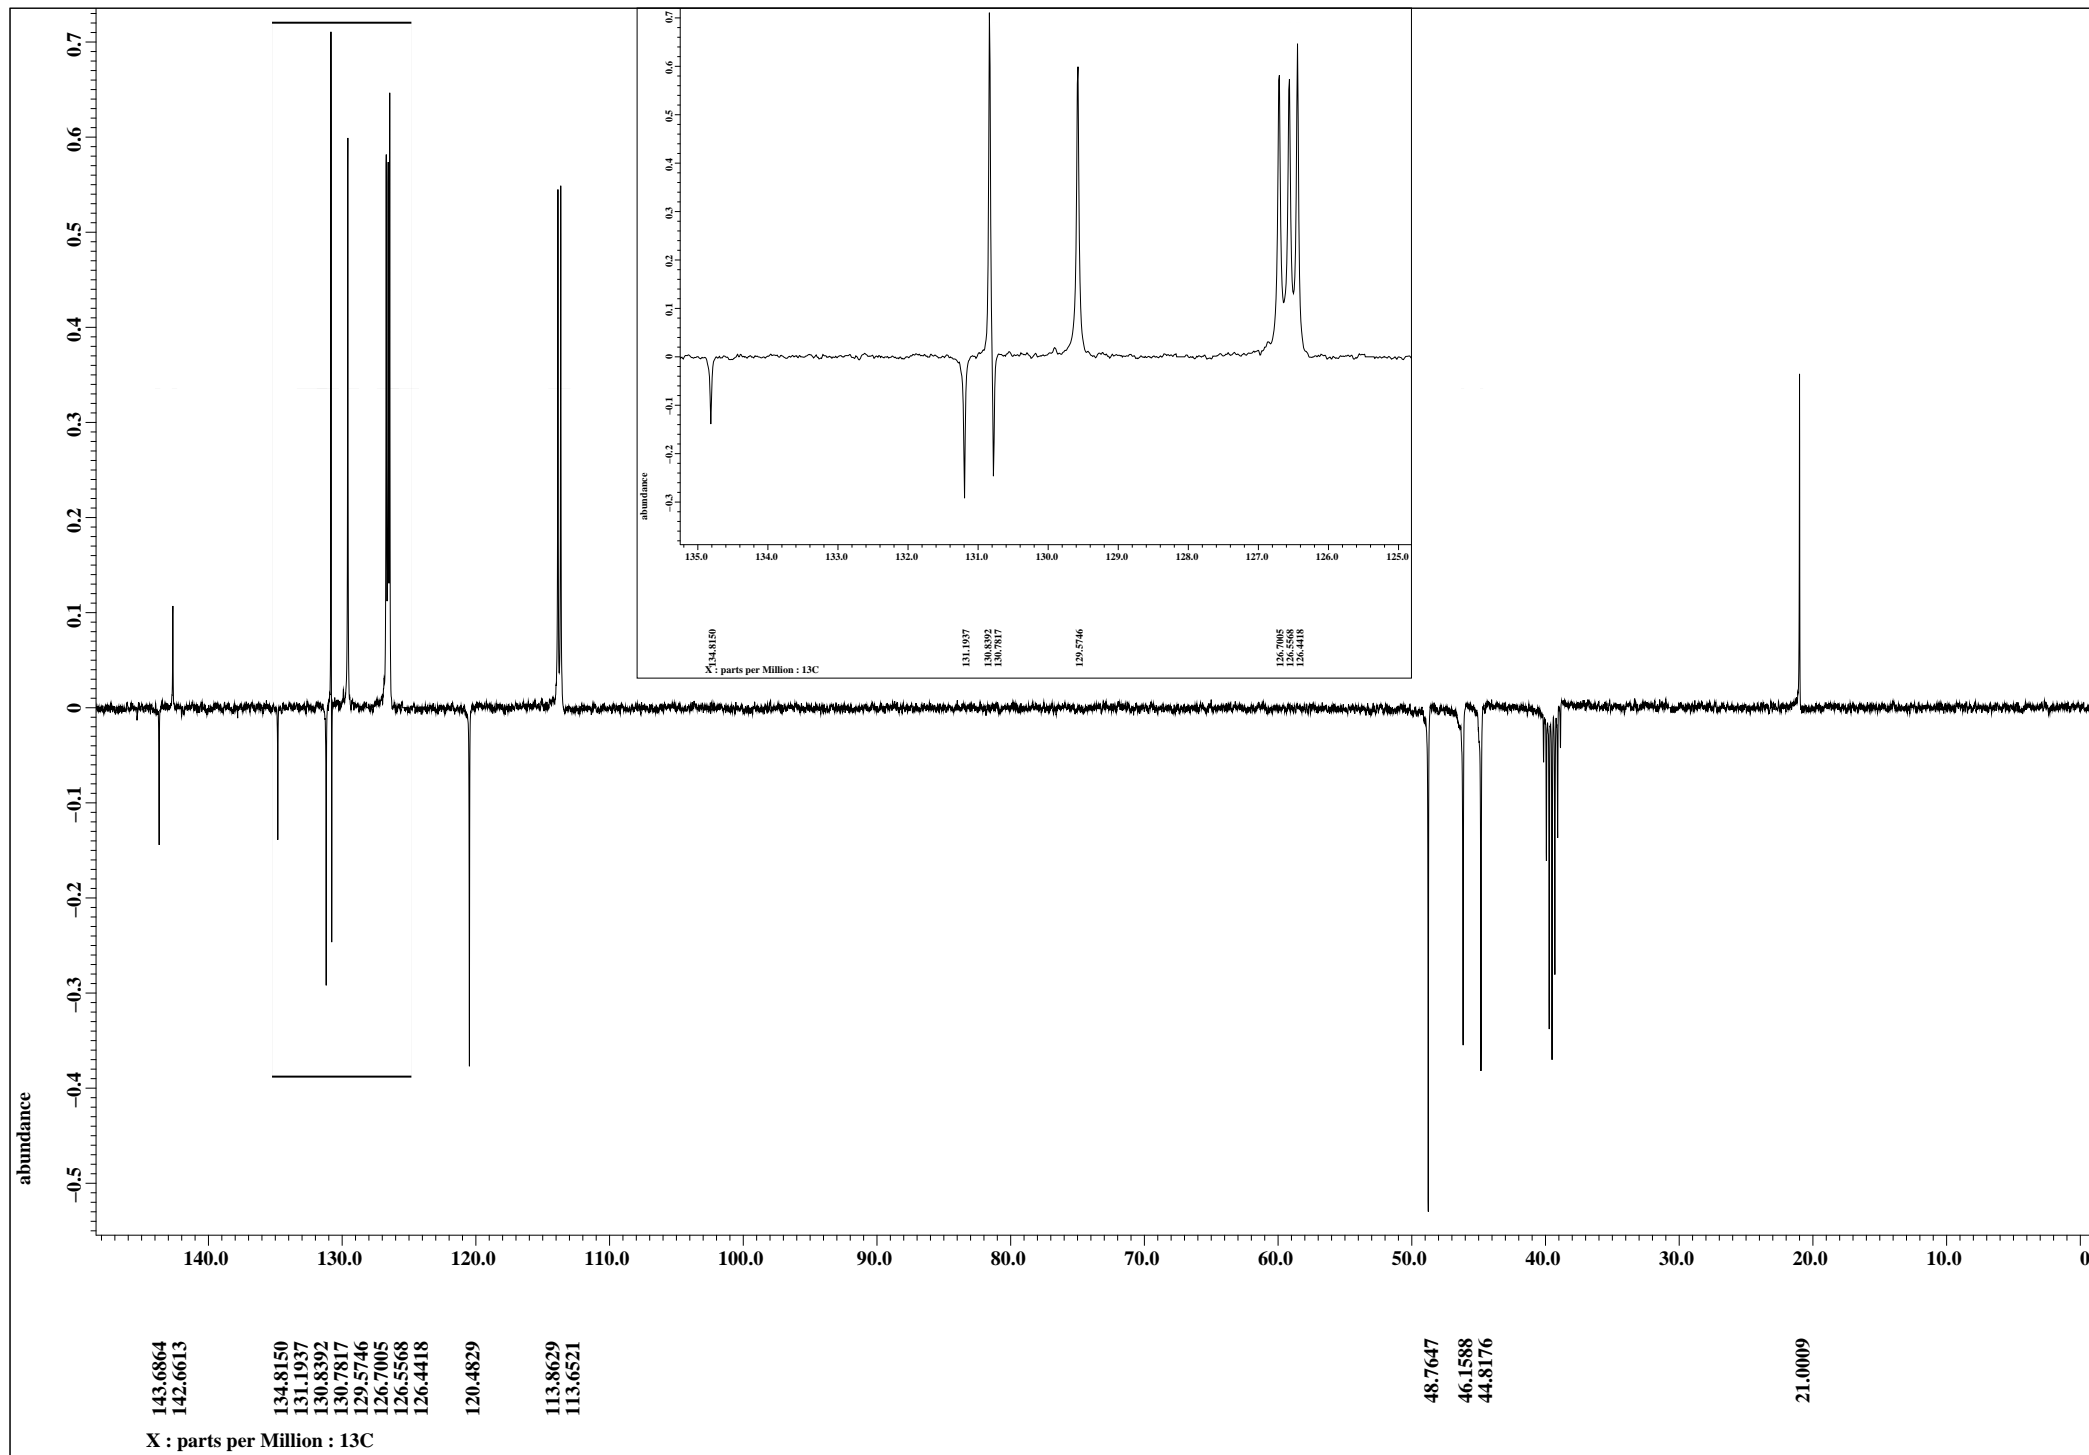

**Figure S11-<sup>1</sup>H & <sup>13</sup>C-NMR of IL-6b (400 MHz, DMSO-*d*<sub>6</sub>)**

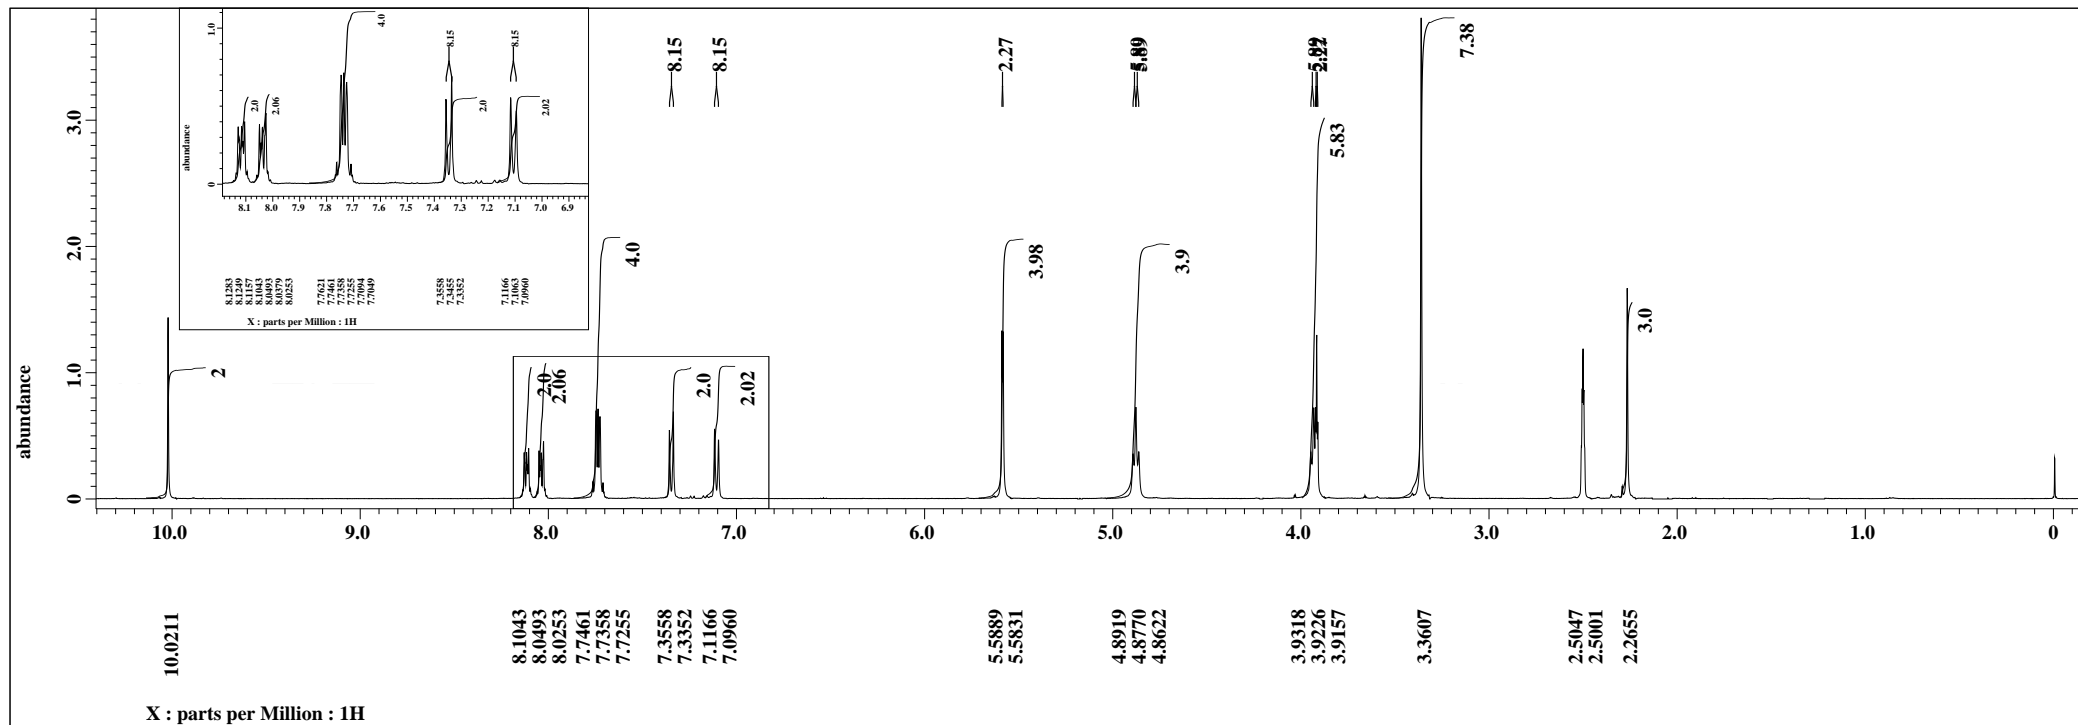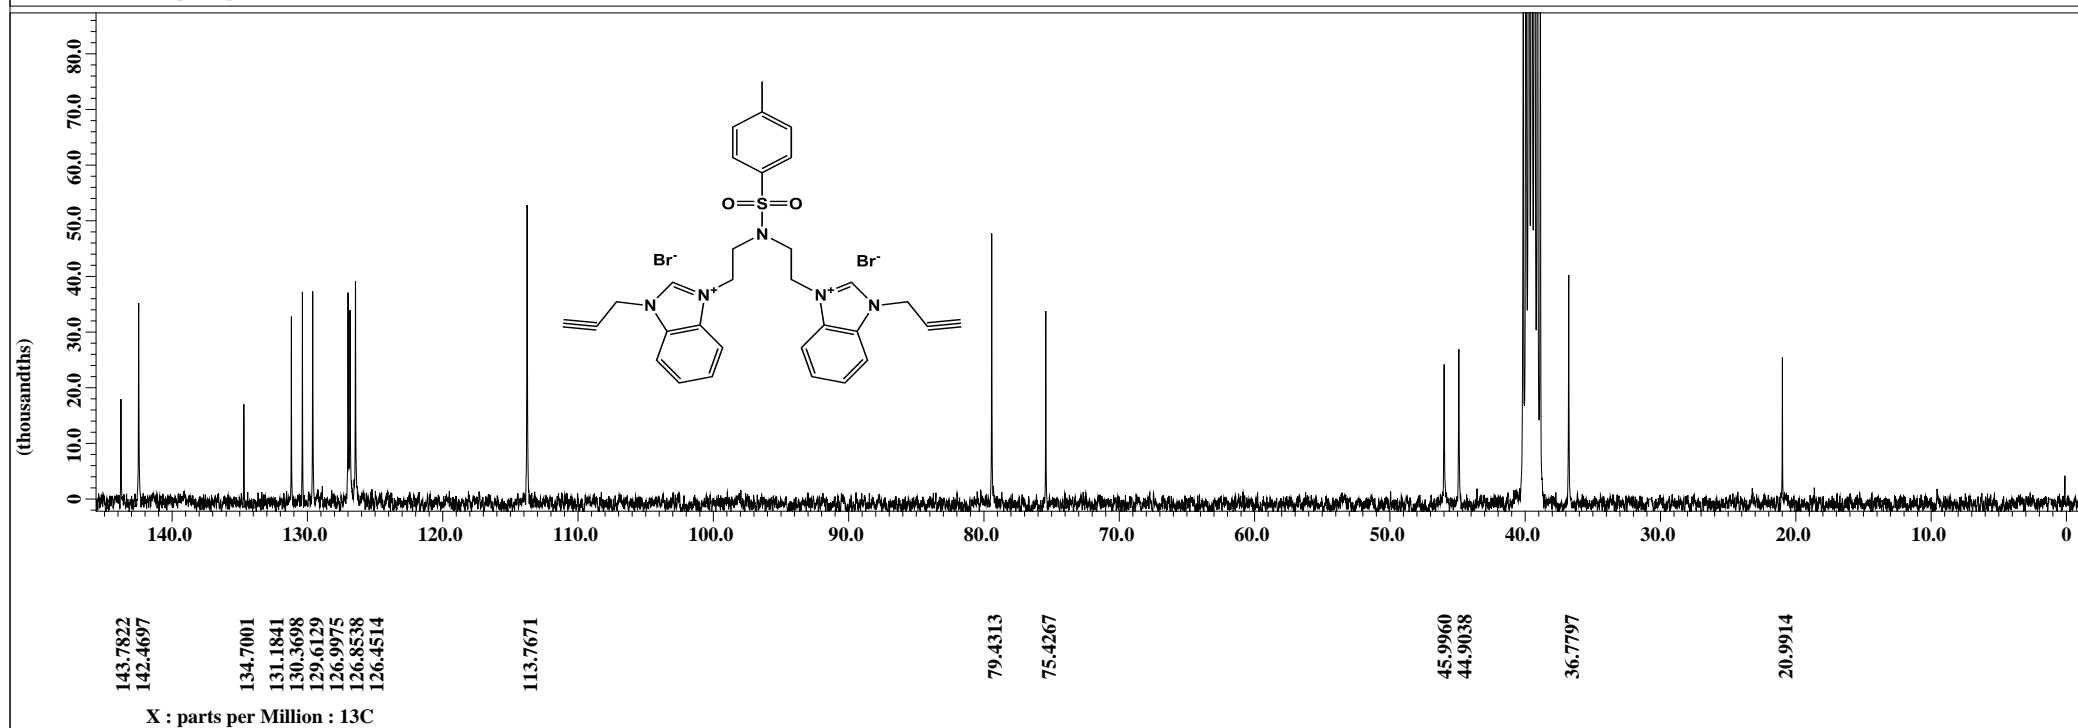

**Figure S12-**<sup>13</sup>C-NMR PENDANT of IL-6b (100 MHz,DMSO-*d*<sub>6</sub>)

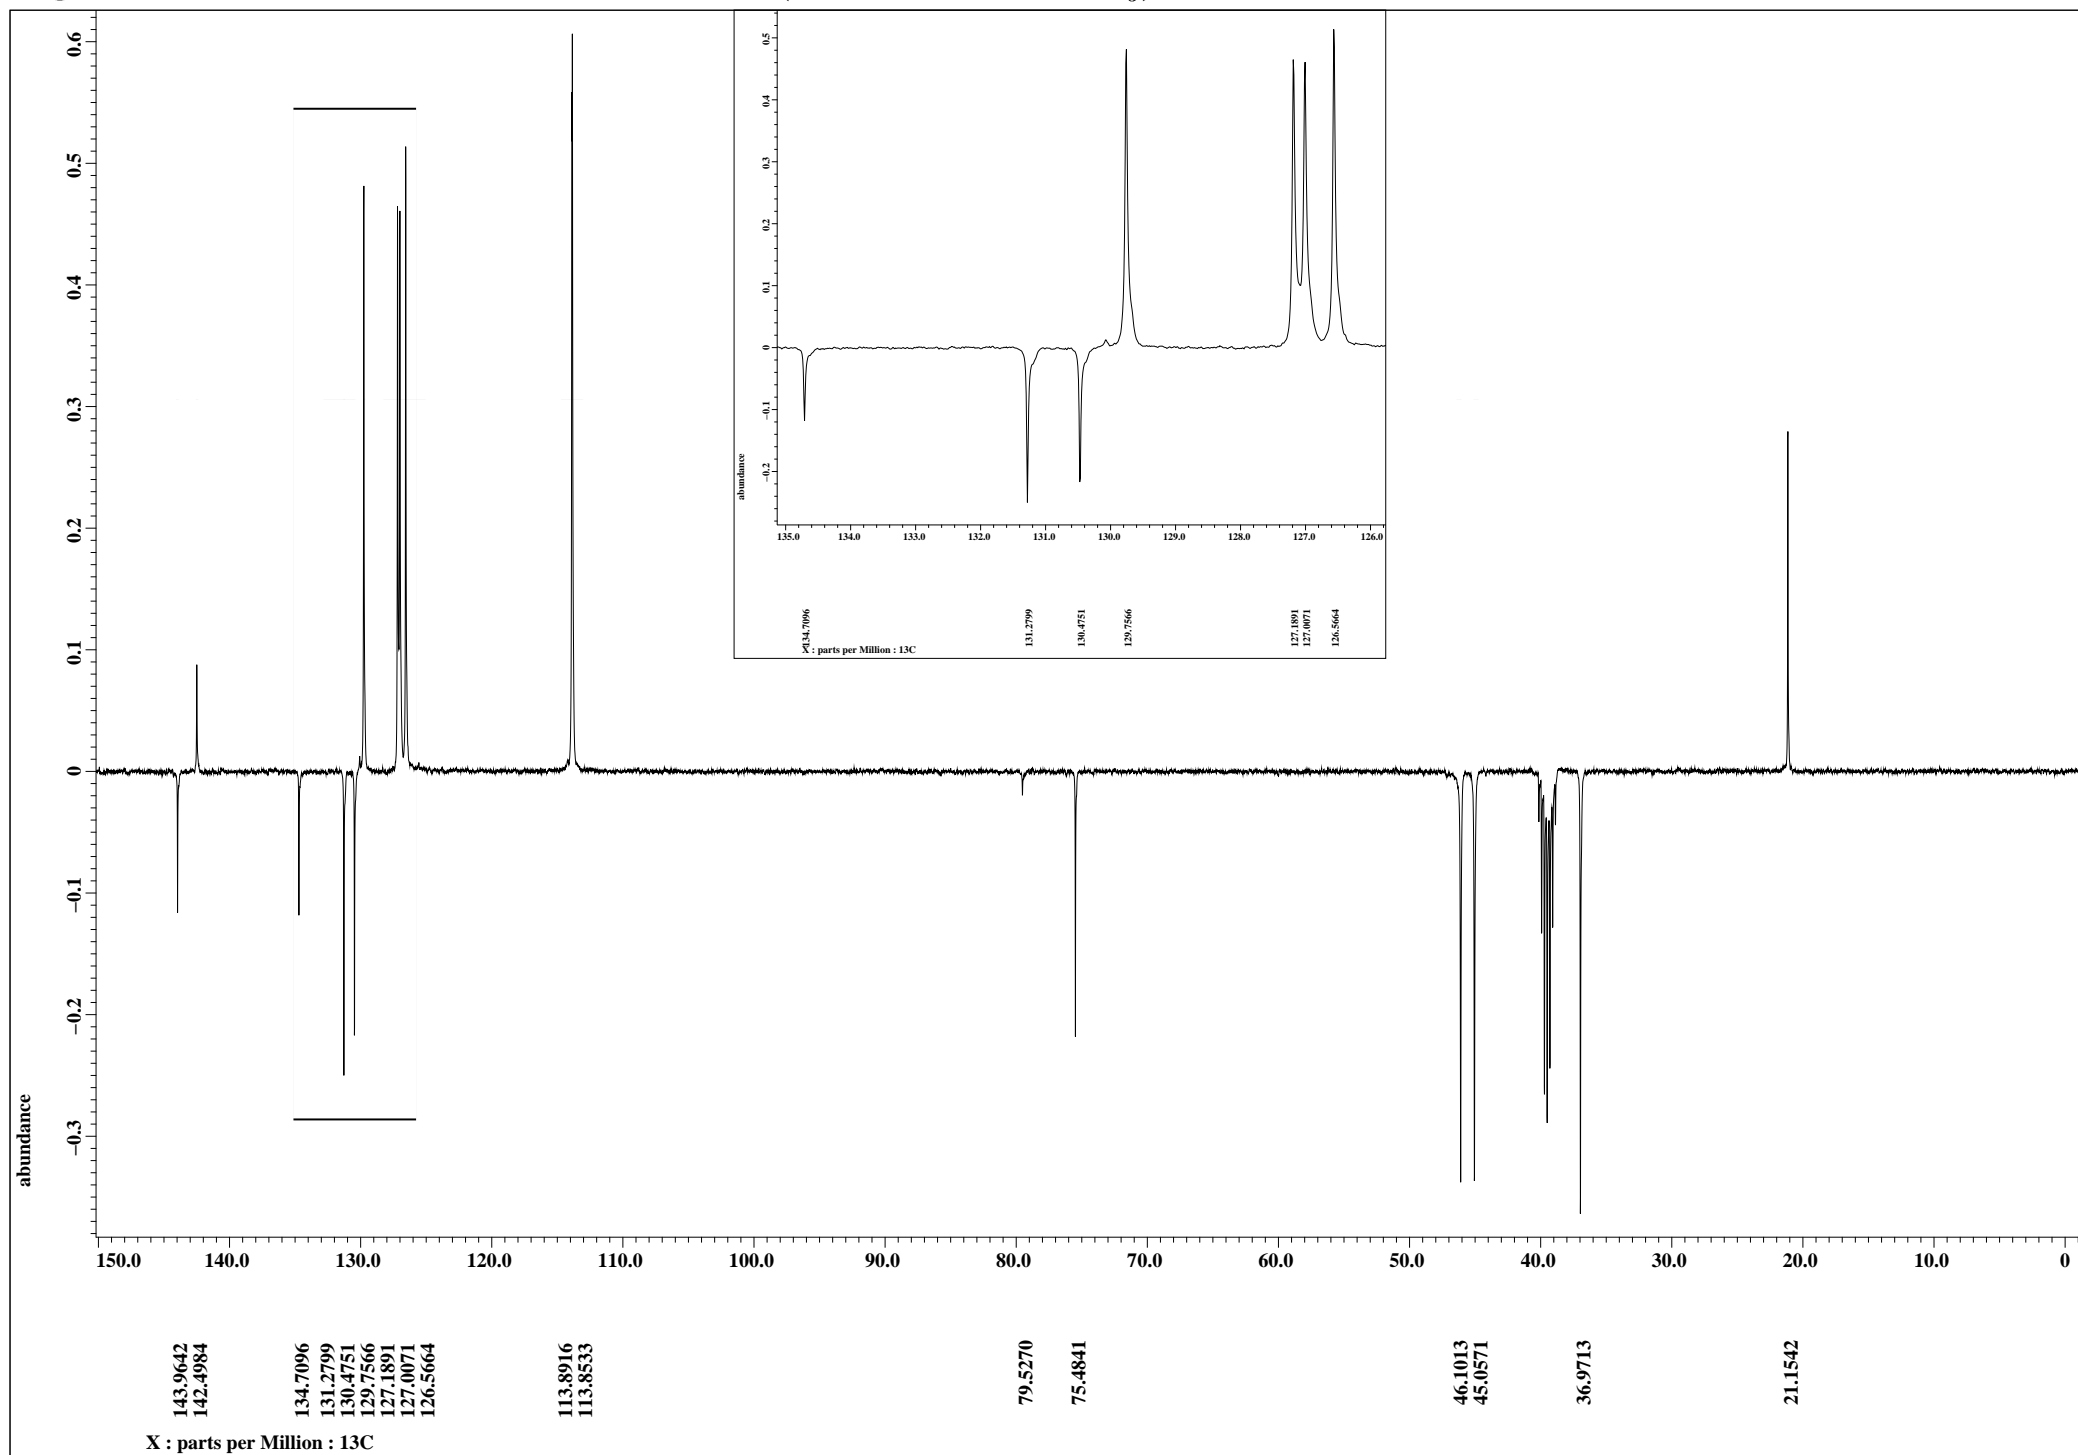

Figure S13-<sup>1</sup>H & <sup>13</sup>C-NMR of IL-6c (400 MHz, DMSO-*d*<sub>6</sub>)

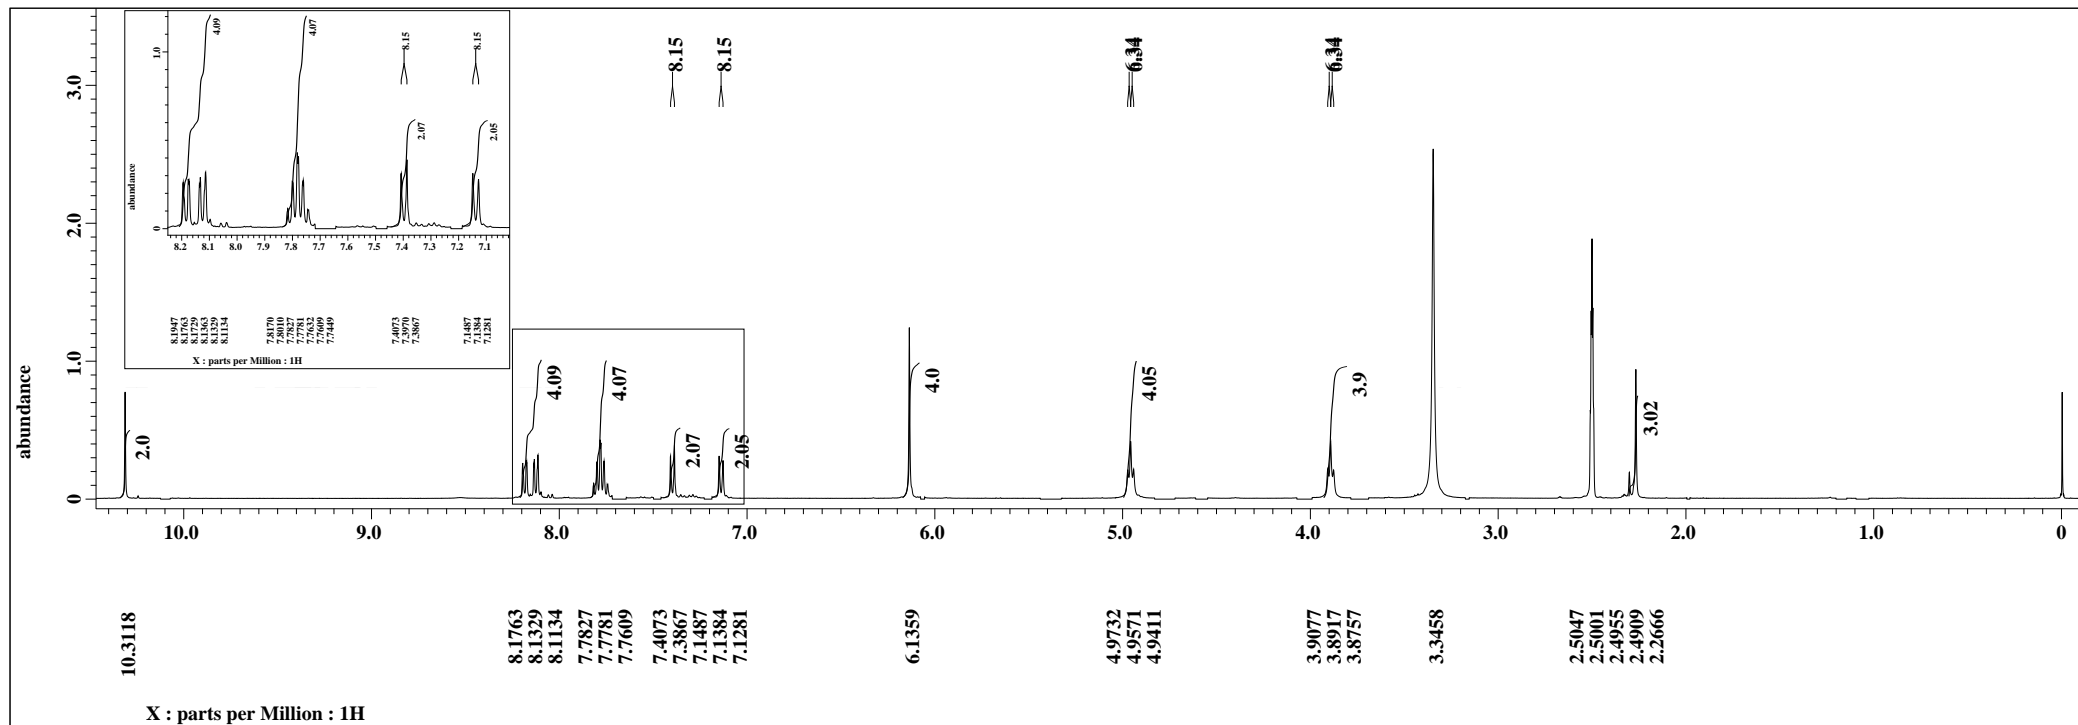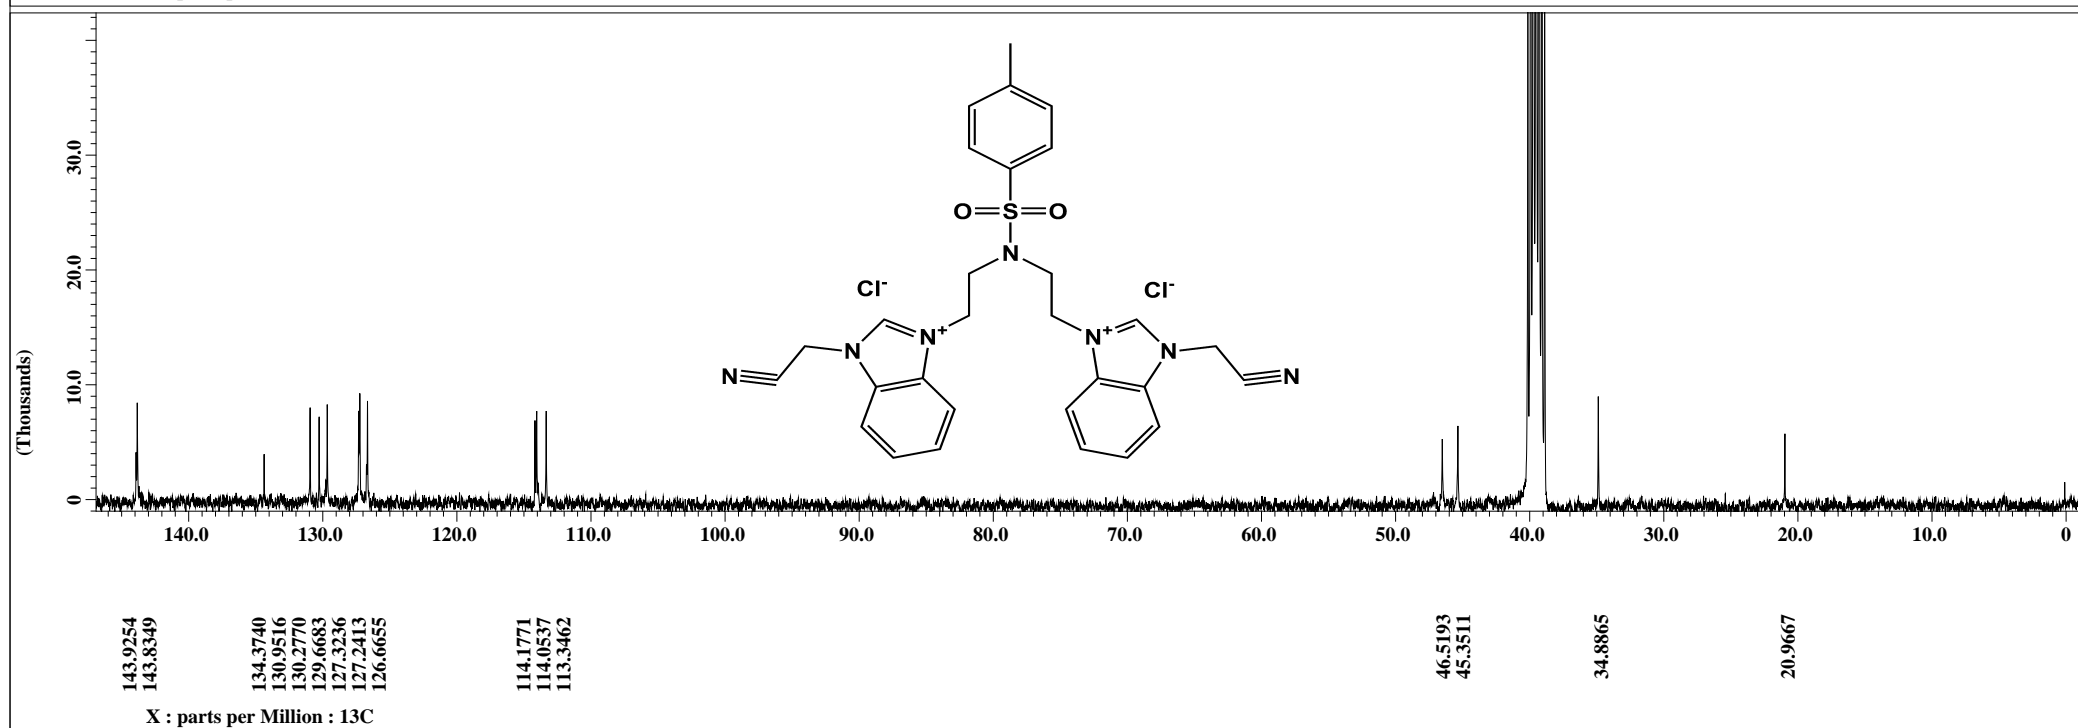

Figure S14-<sup>1</sup>H & <sup>13</sup>C-NMR of IL-6d (400 MHz, DMSO-*d*<sub>6</sub>)

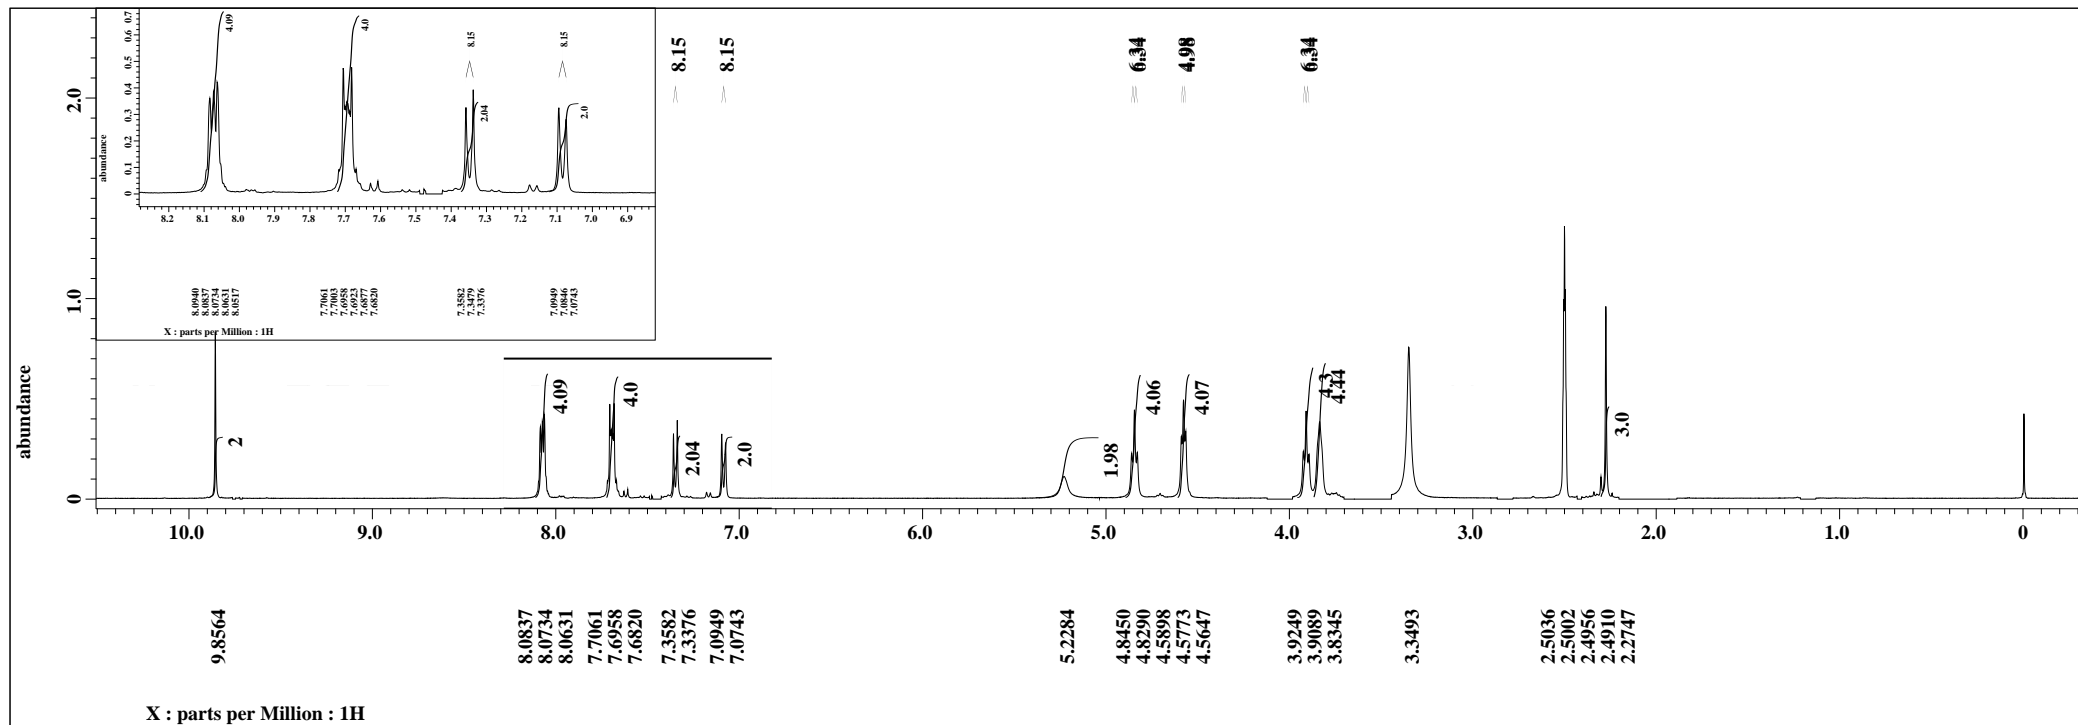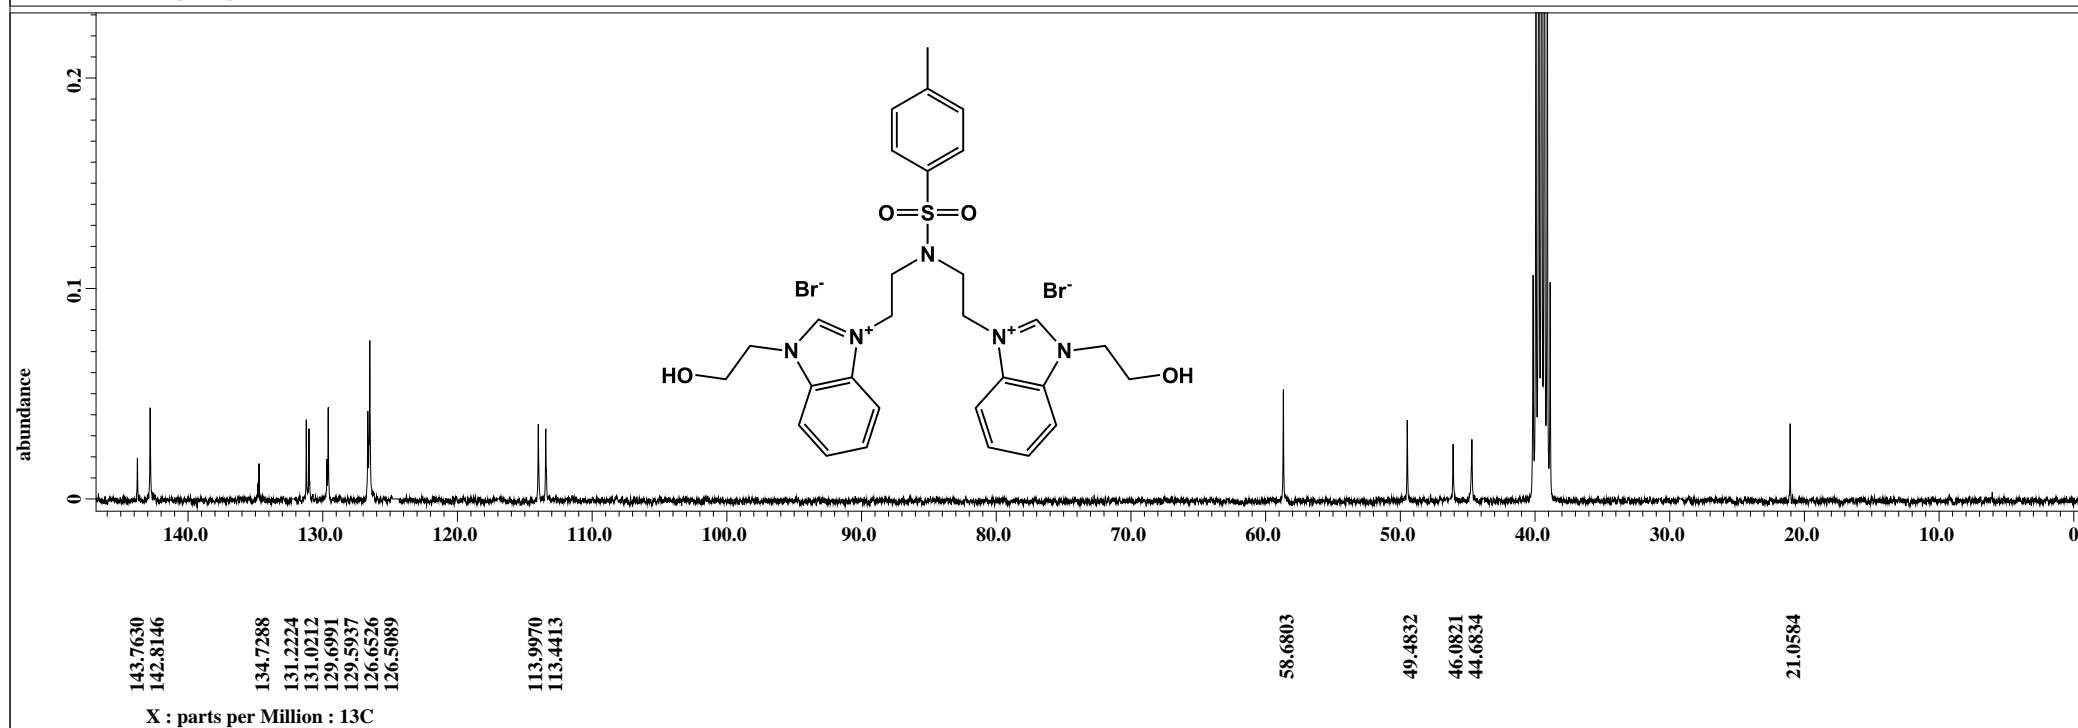

**Figure S15-**<sup>13</sup>C-NMR PENDANT of IL-6d (100 MHz,DMSO-*d*<sub>6</sub>)

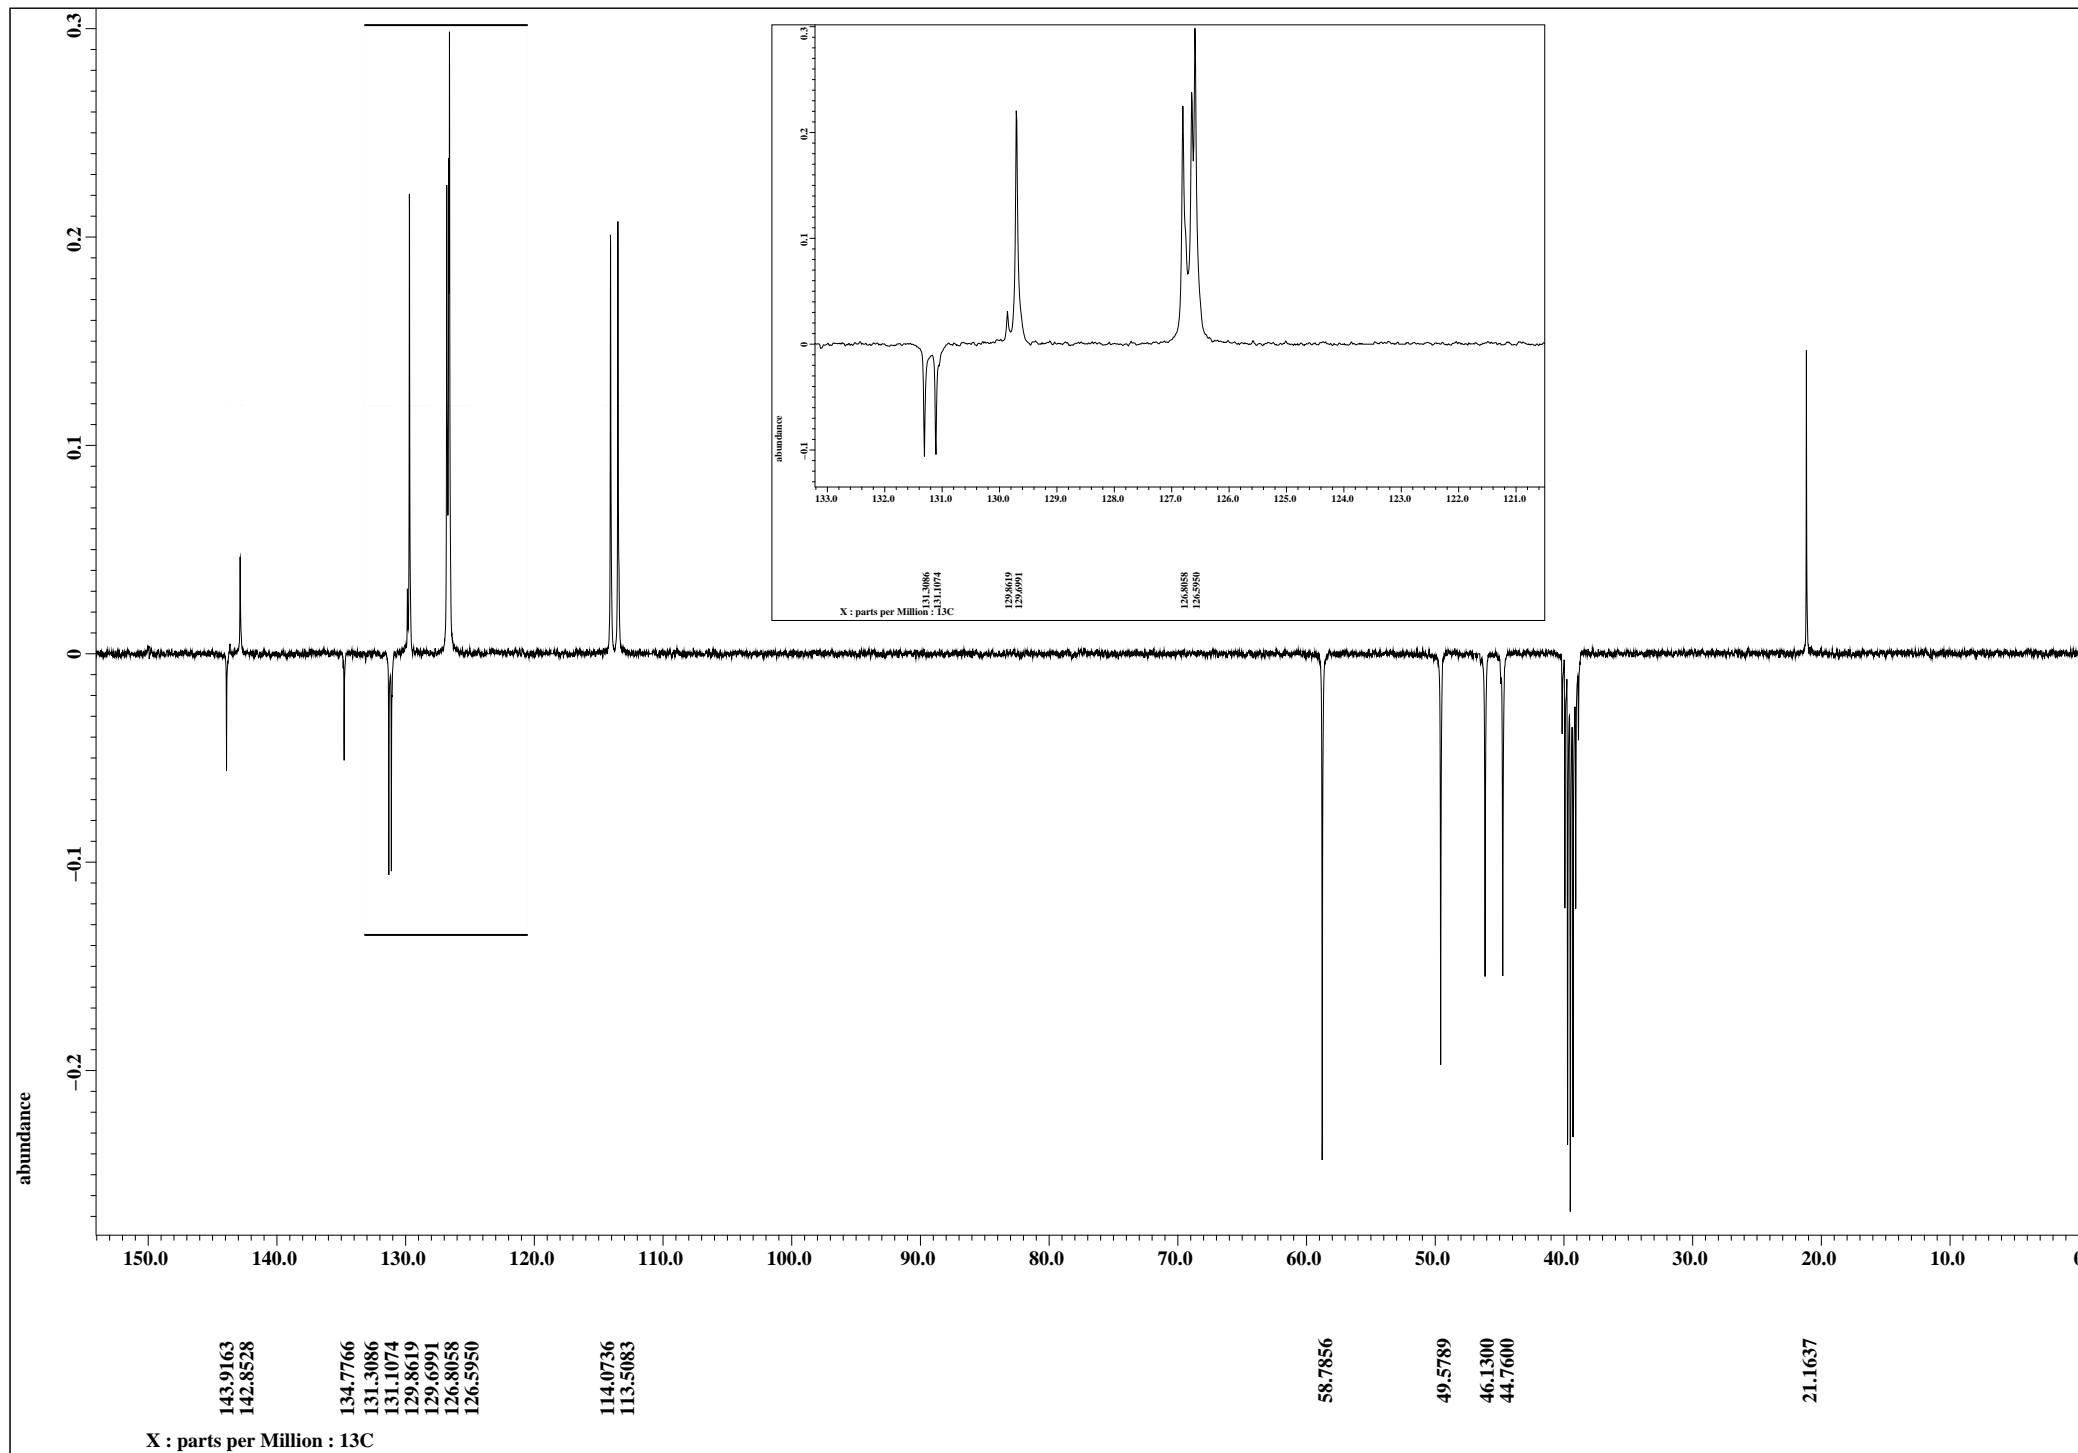

**Figure S16-**<sup>1</sup>H & <sup>13</sup>C-NMR of IL-6e (400 MHz, DMSO-*d*<sub>6</sub>)

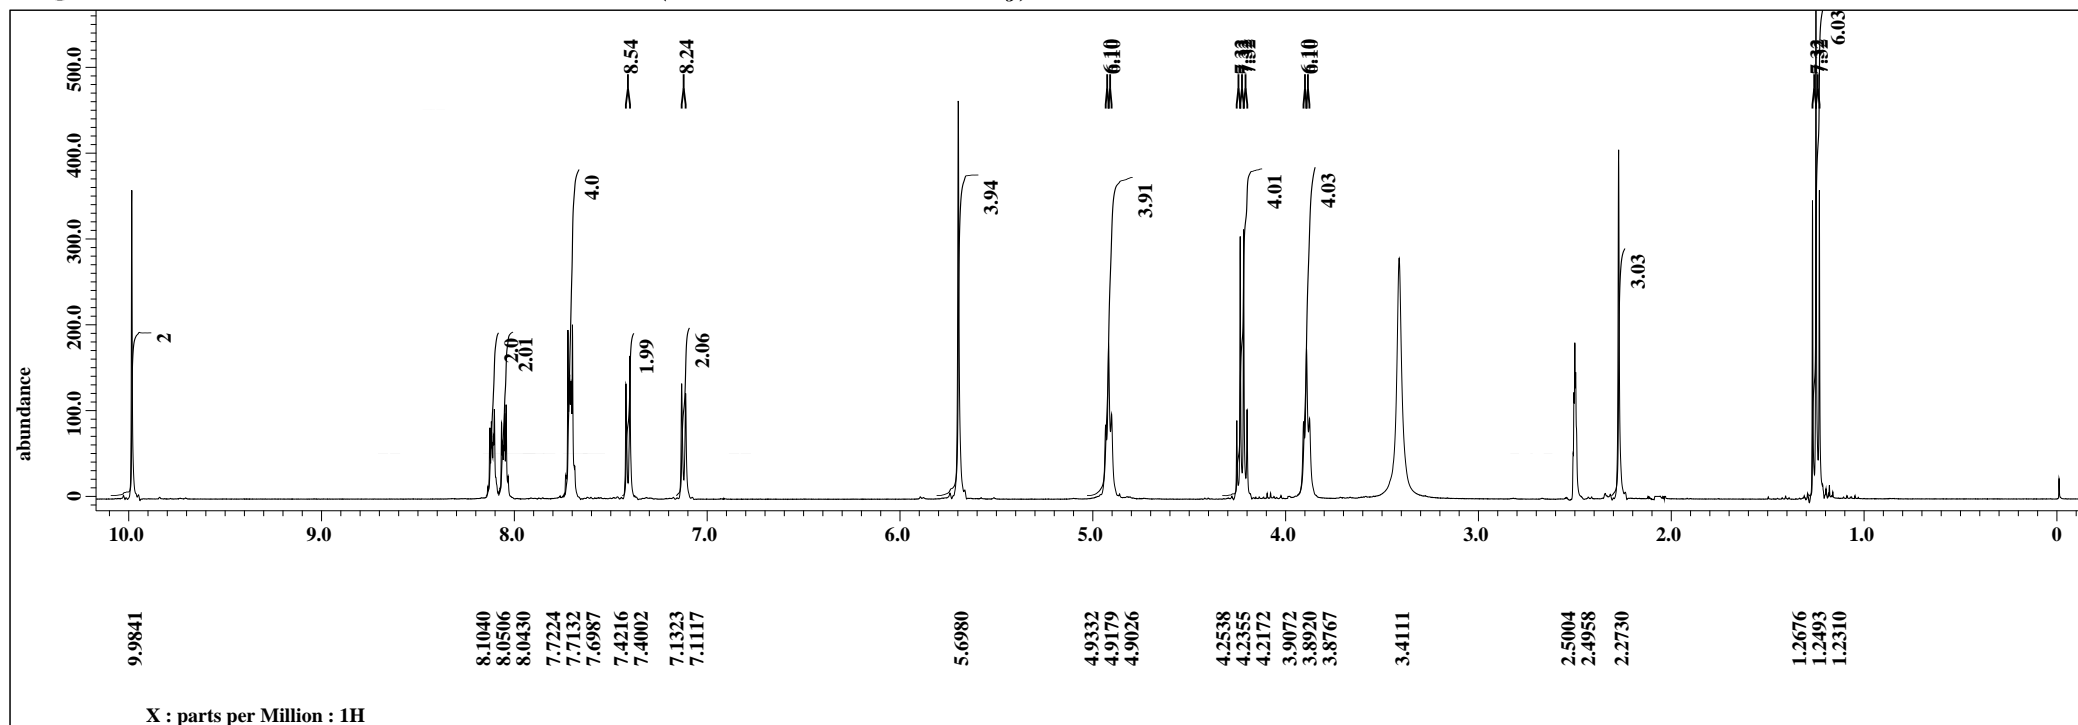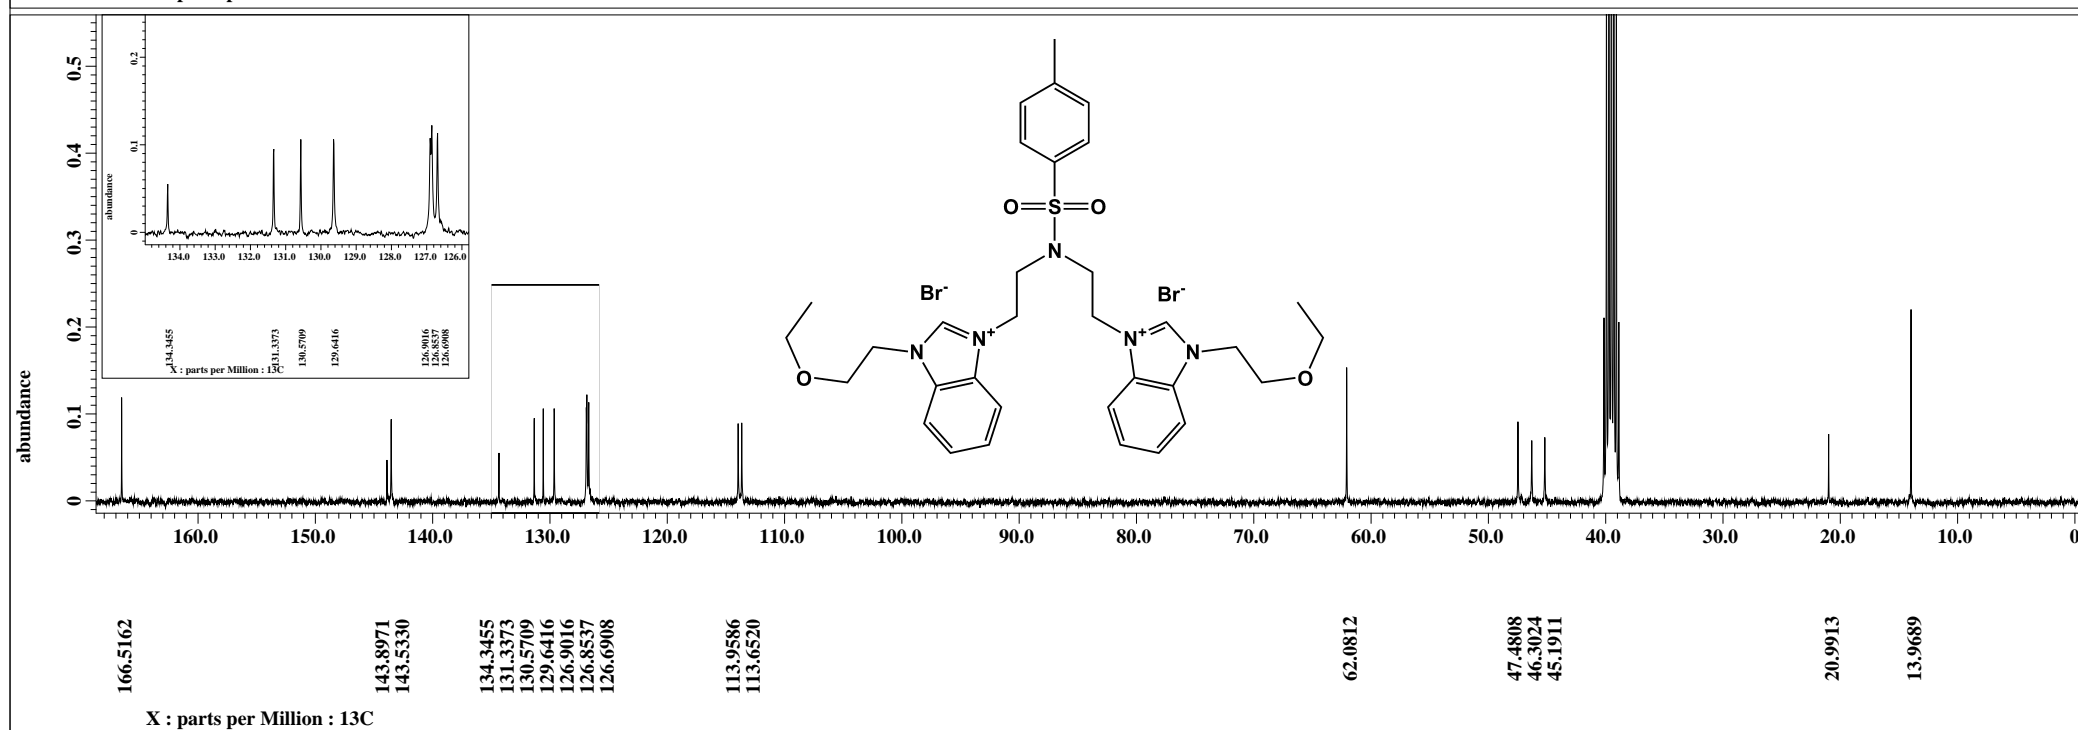



**Figure S17-**<sup>13</sup>C-NMR PENDANT of IL-6e (100 MHz, DMSO-*d*<sub>6</sub>)

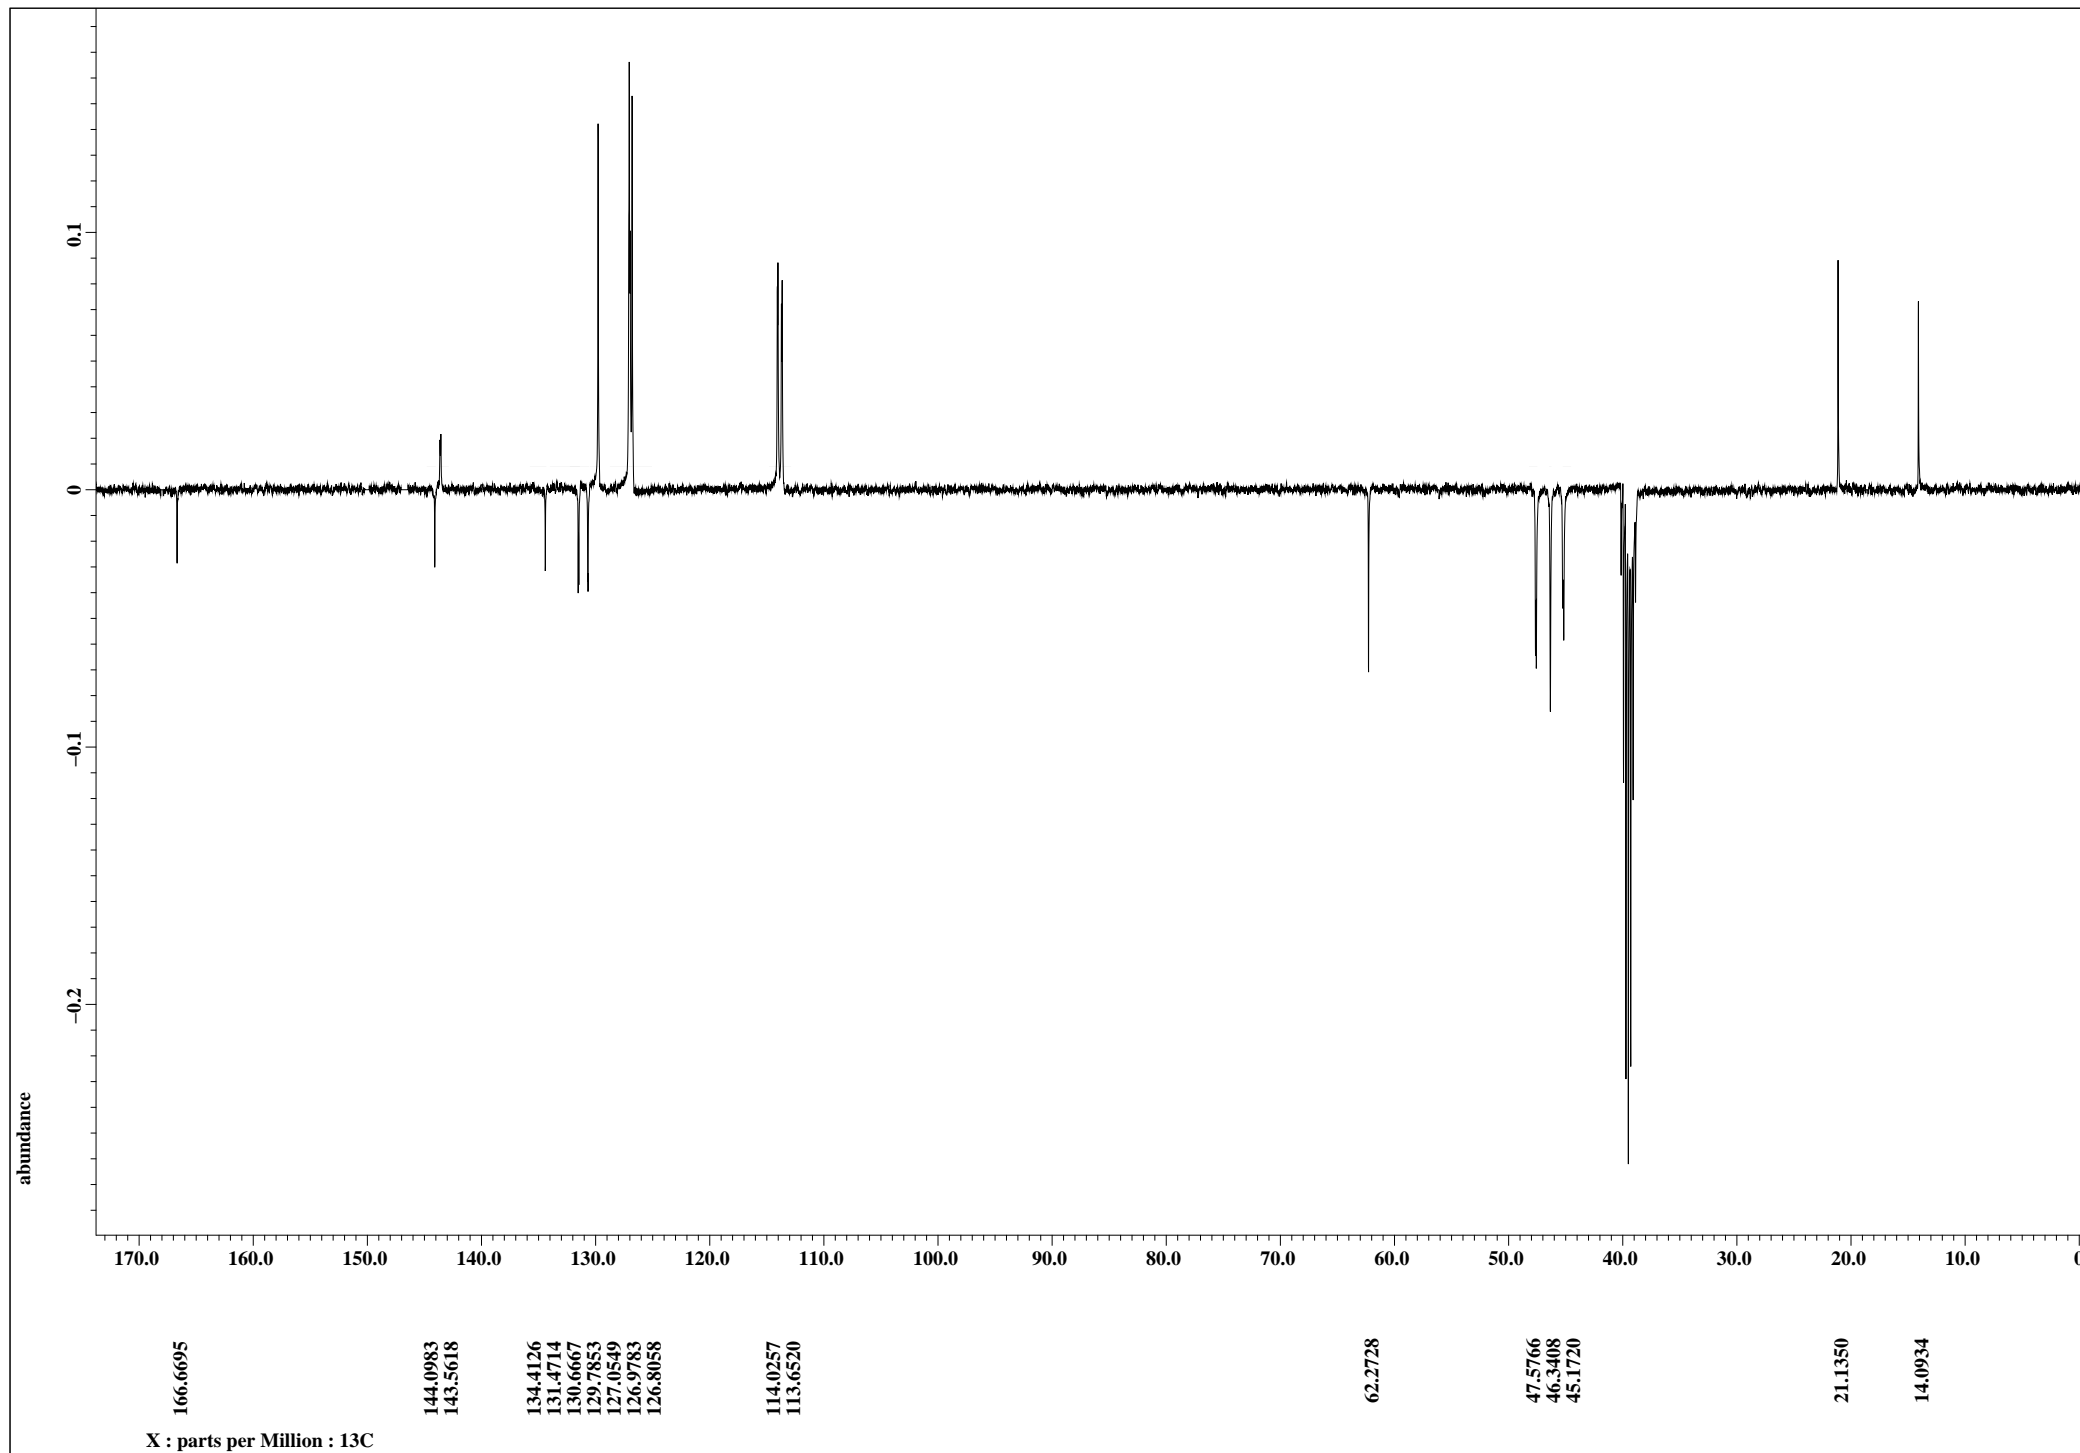

**Figure S18-<sup>1</sup>H & <sup>13</sup>C-NMR of IL-6f (400 MHz, DMSO-*d*<sub>6</sub>)**

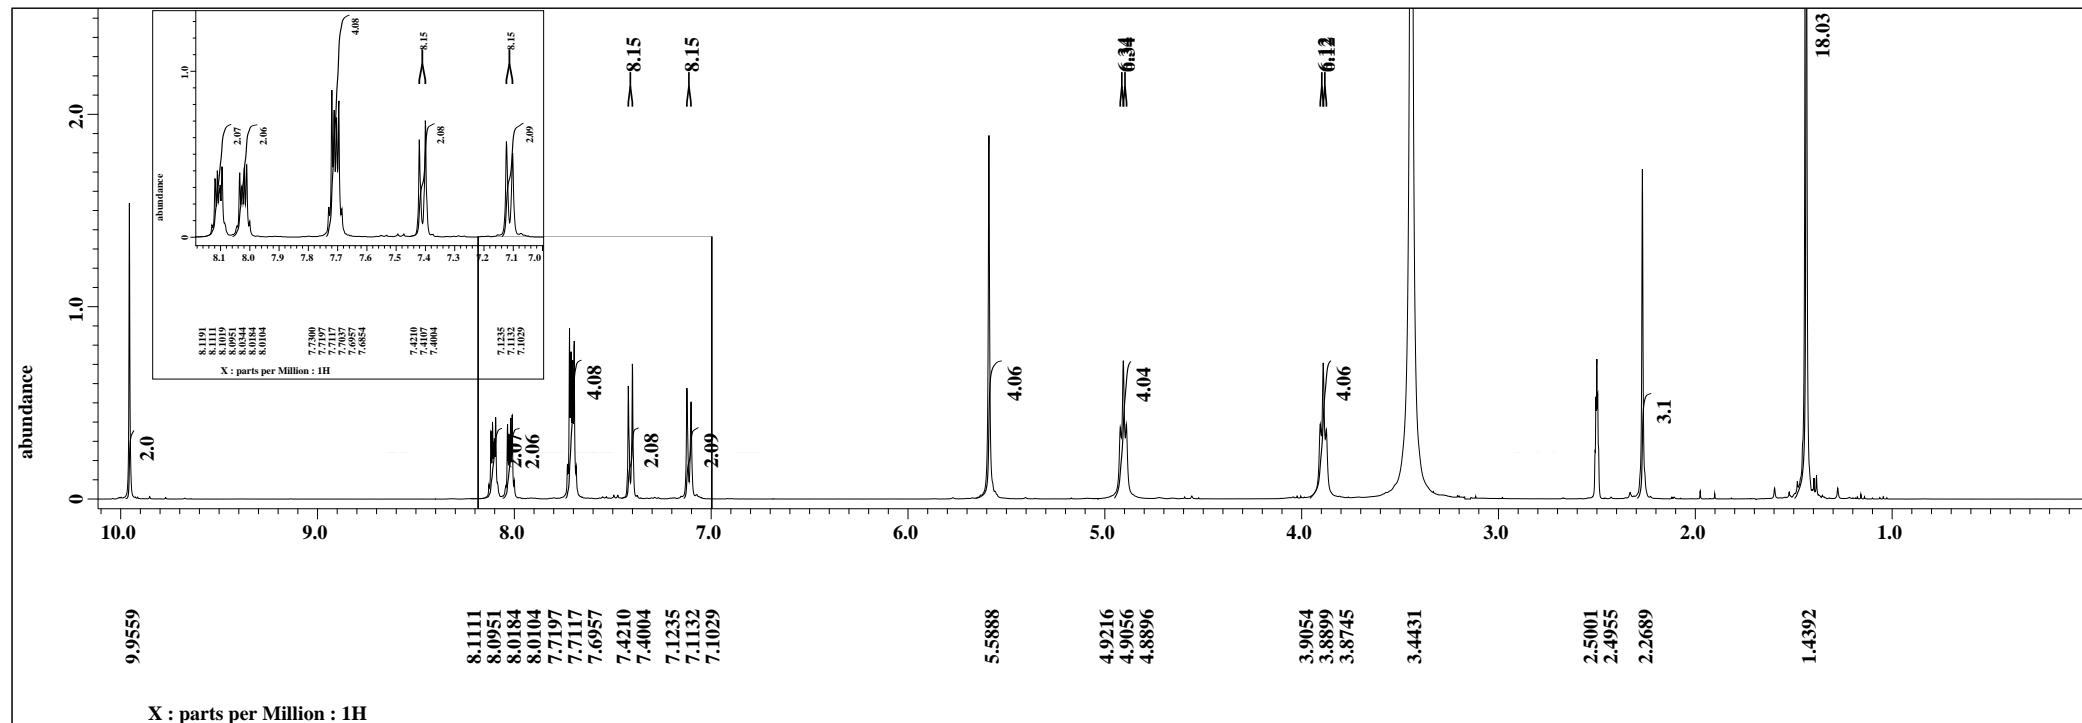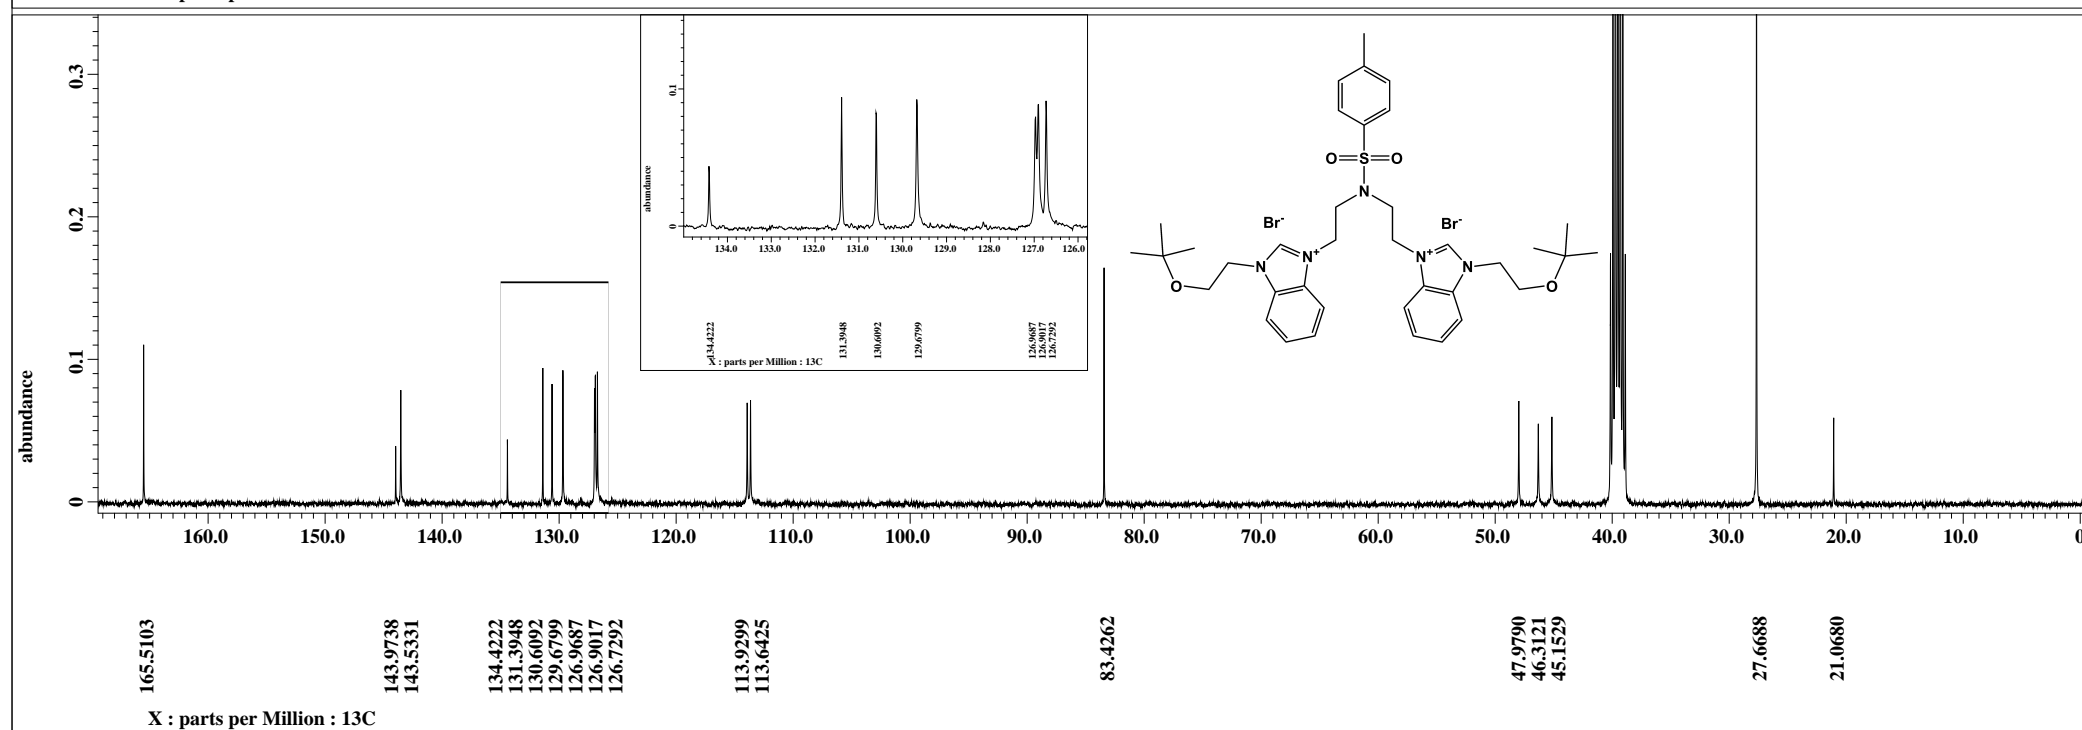

**Figure S19-**<sup>13</sup>C-NMR PENDANT of IL-6f (100 MHz,DMSO-*d*<sub>6</sub>)

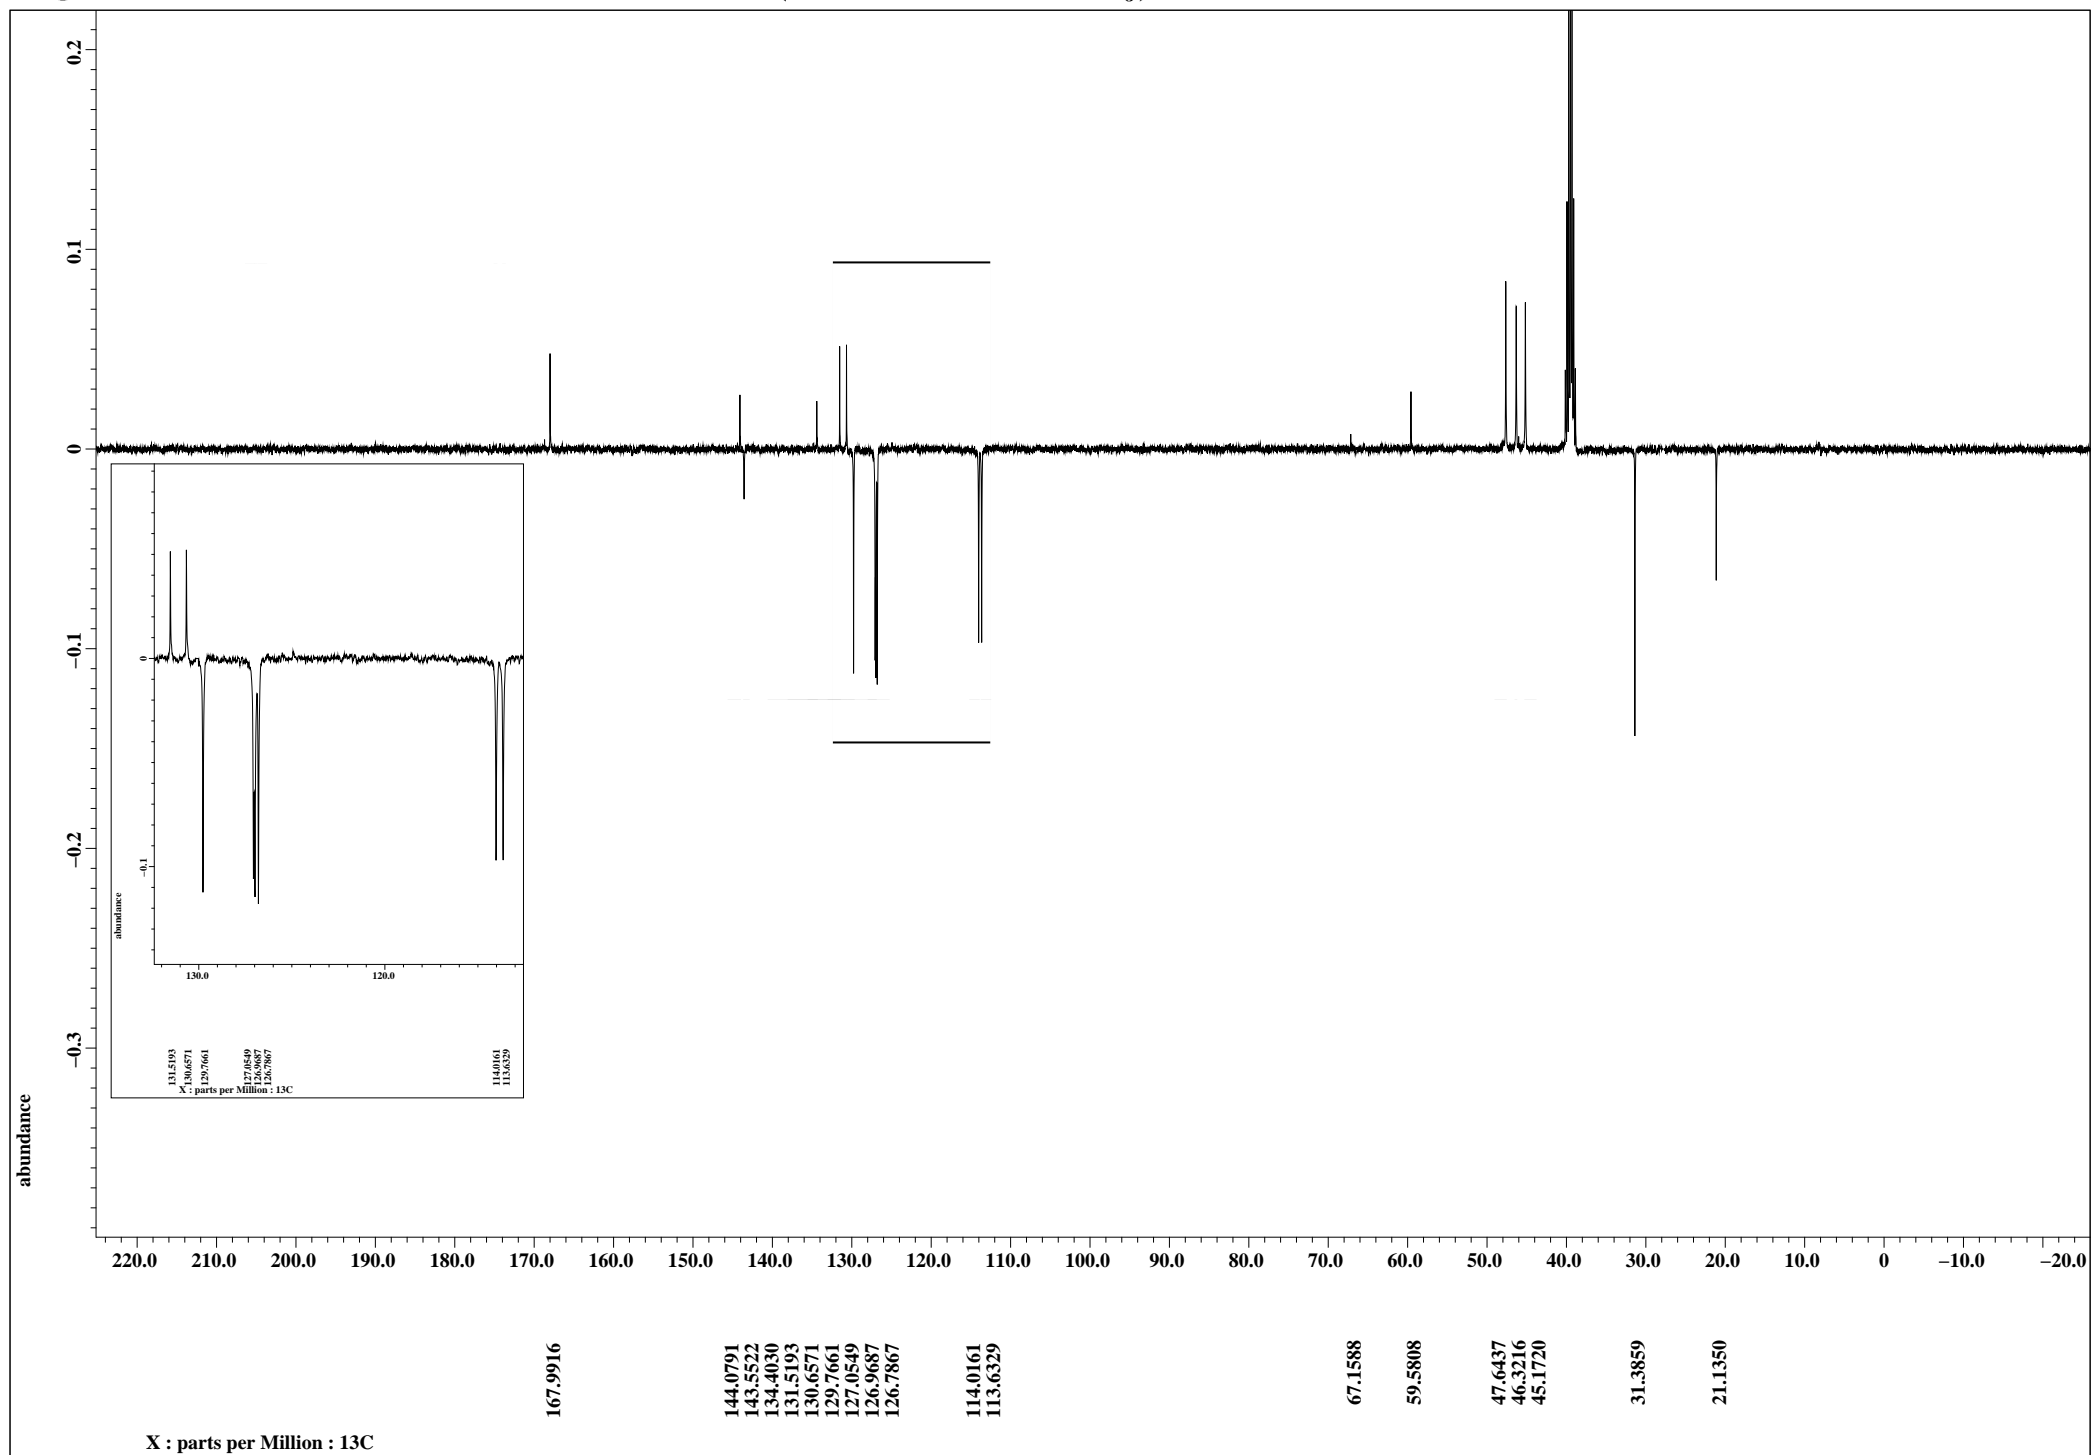

**Figure S20-<sup>1</sup>H & <sup>13</sup>C-NMR of IL-7e (400 MHz, DMSO-*d*<sub>6</sub>)**

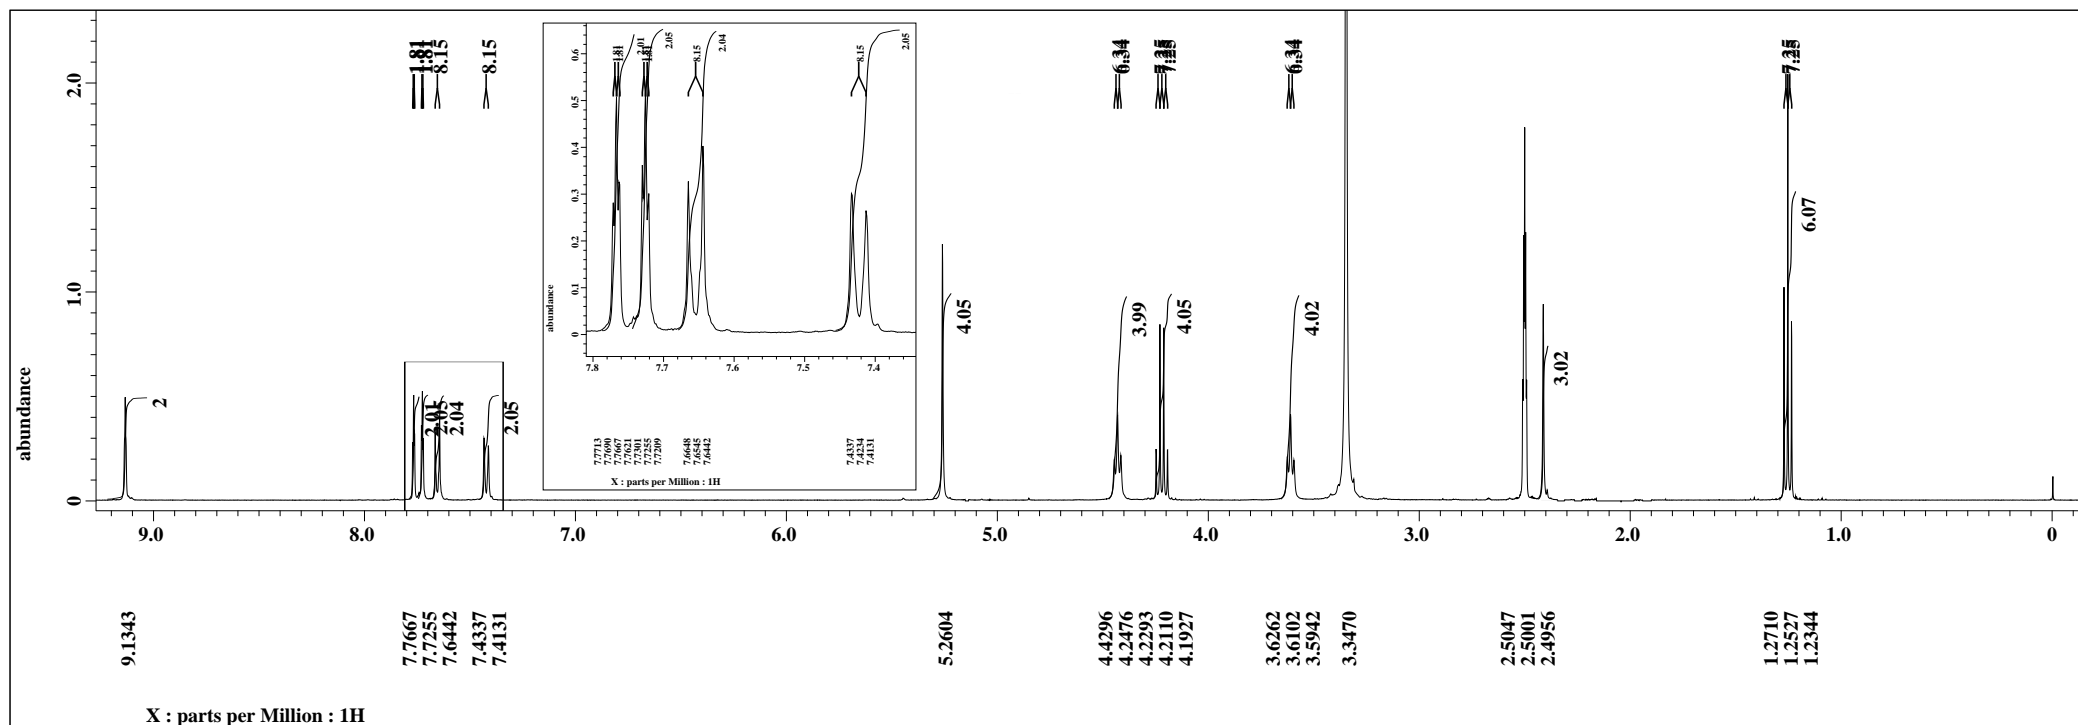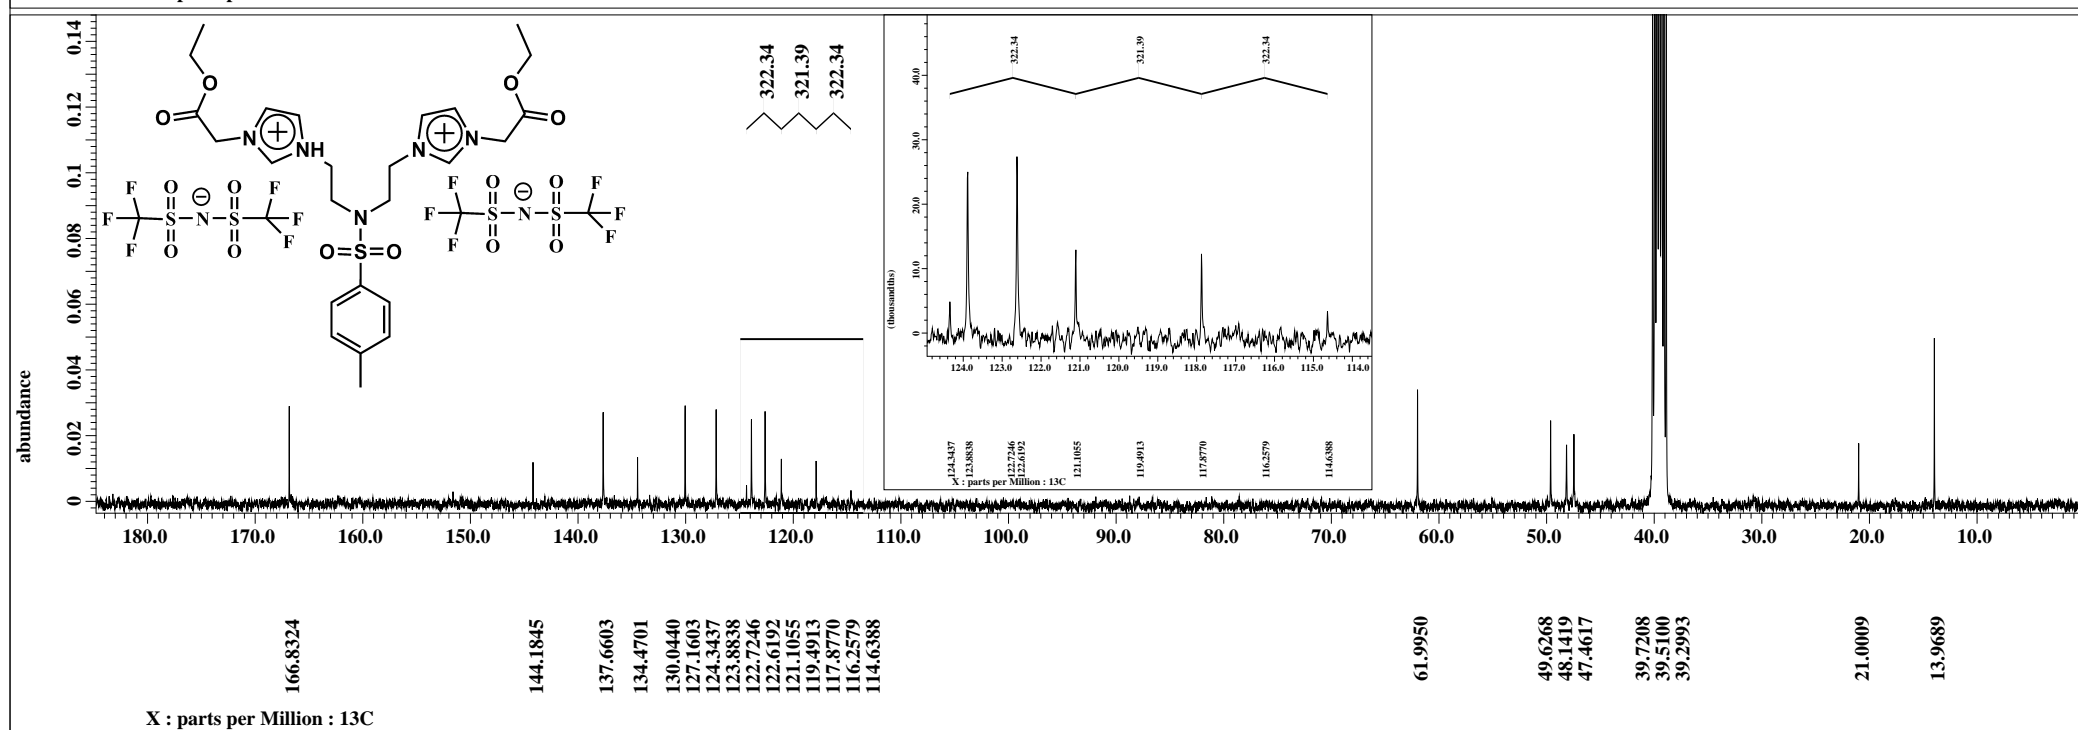

**Figure S21**- $^{19}\text{F}$ -NMR of IL-7e (336 MHz, DMSO- $d_6$ )

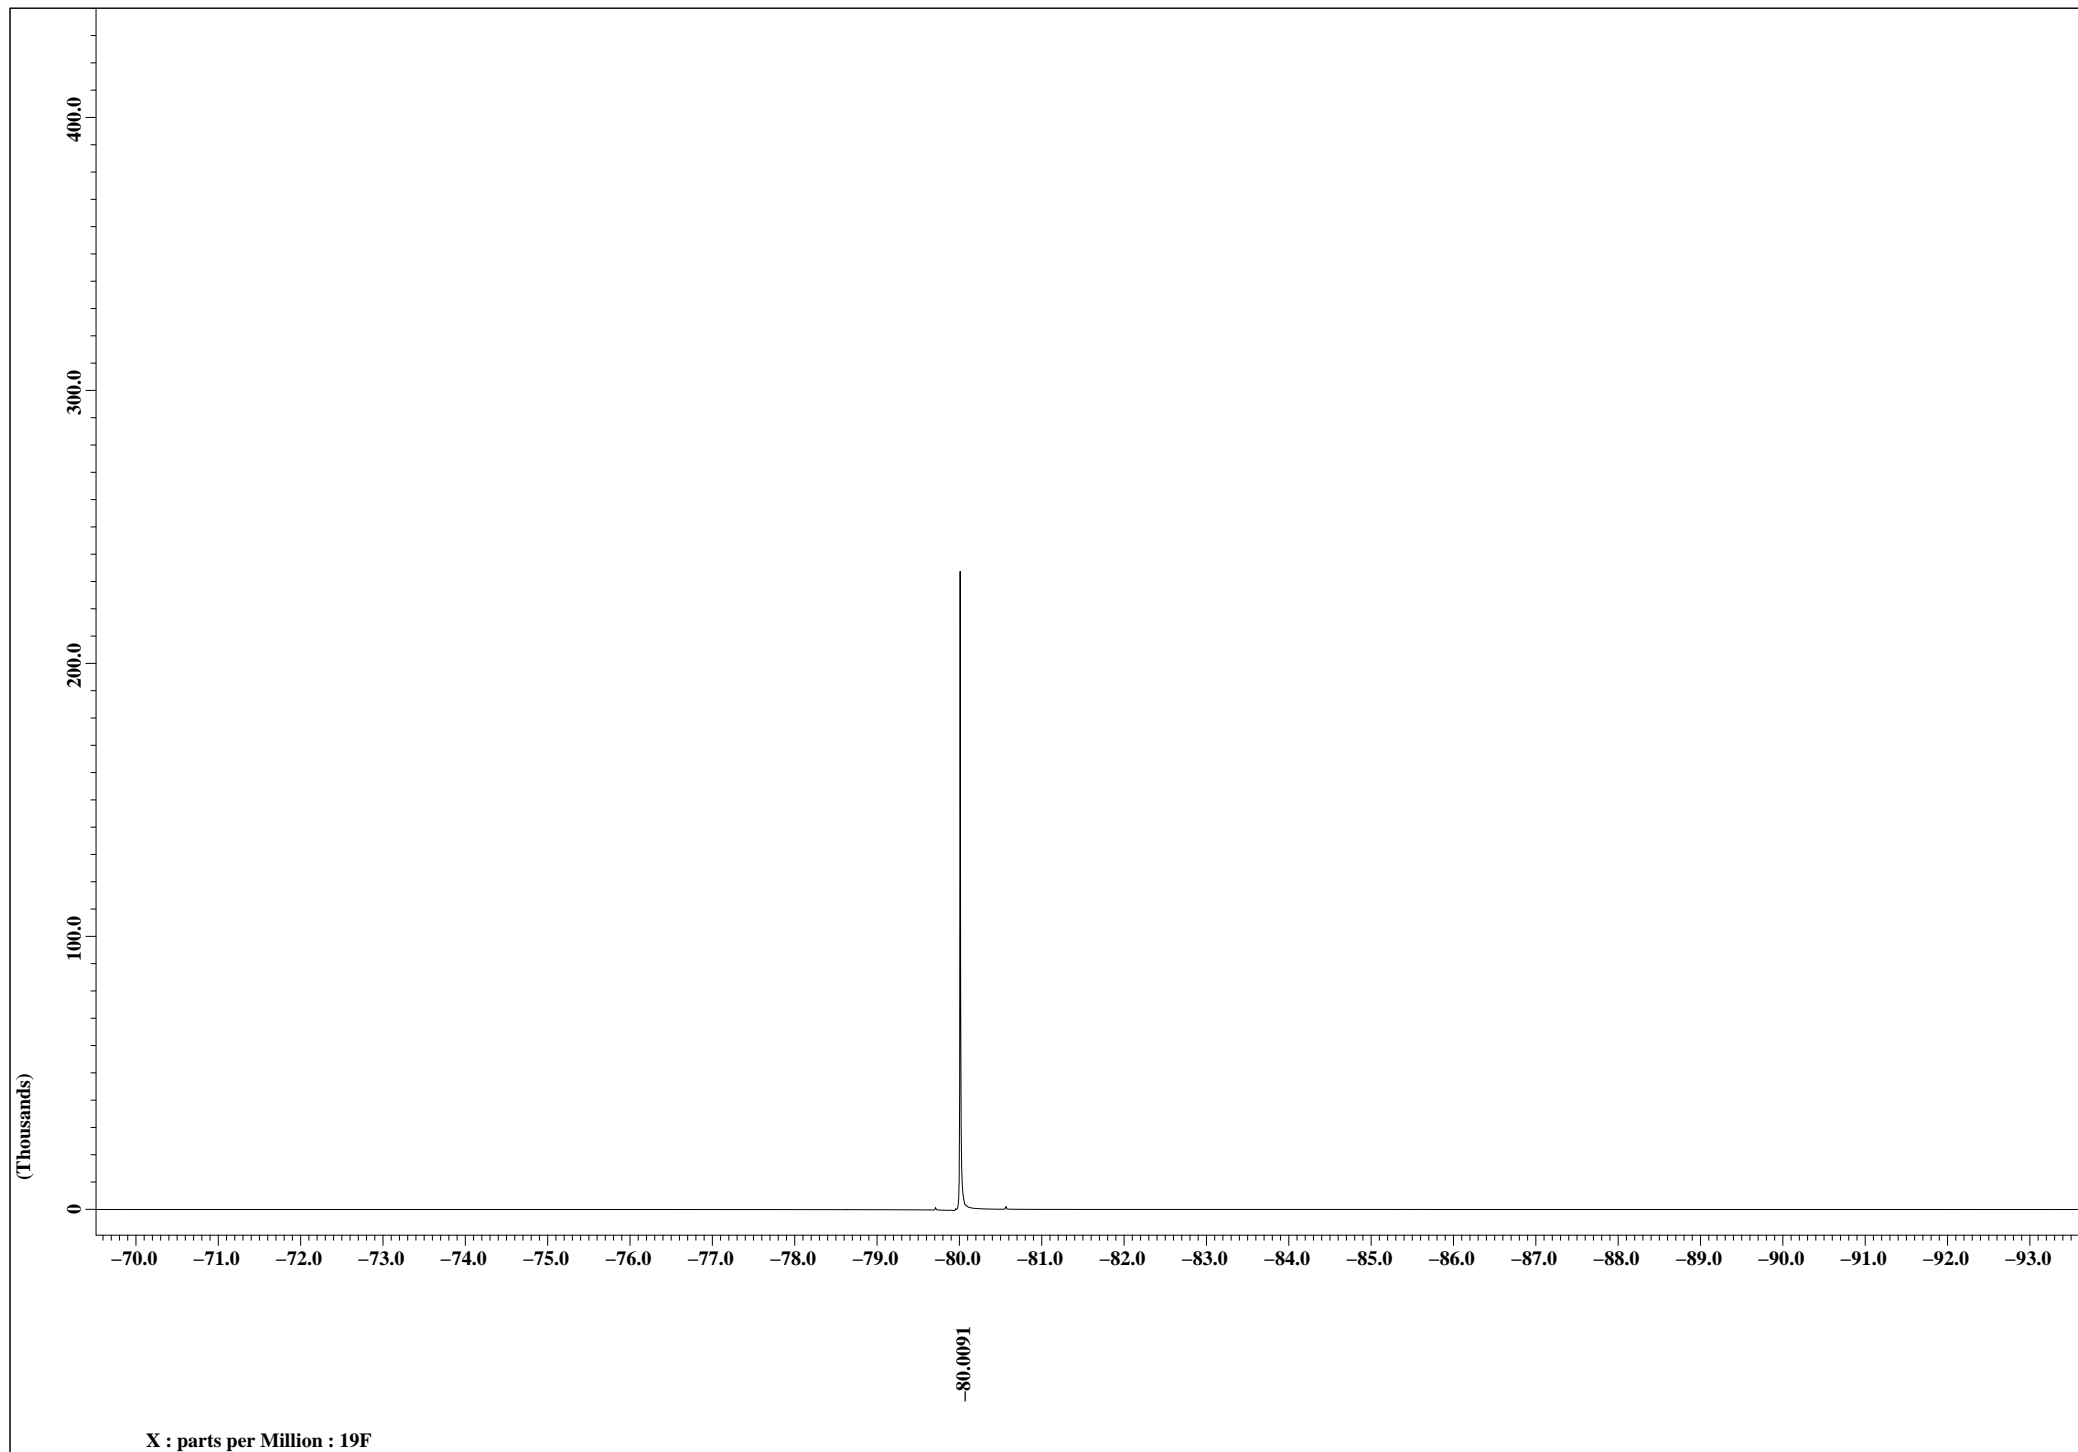

**Figure S22-<sup>1</sup>H & <sup>13</sup>C-NMR of IL-8a (400 MHz, DMSO-*d*<sub>6</sub>)**

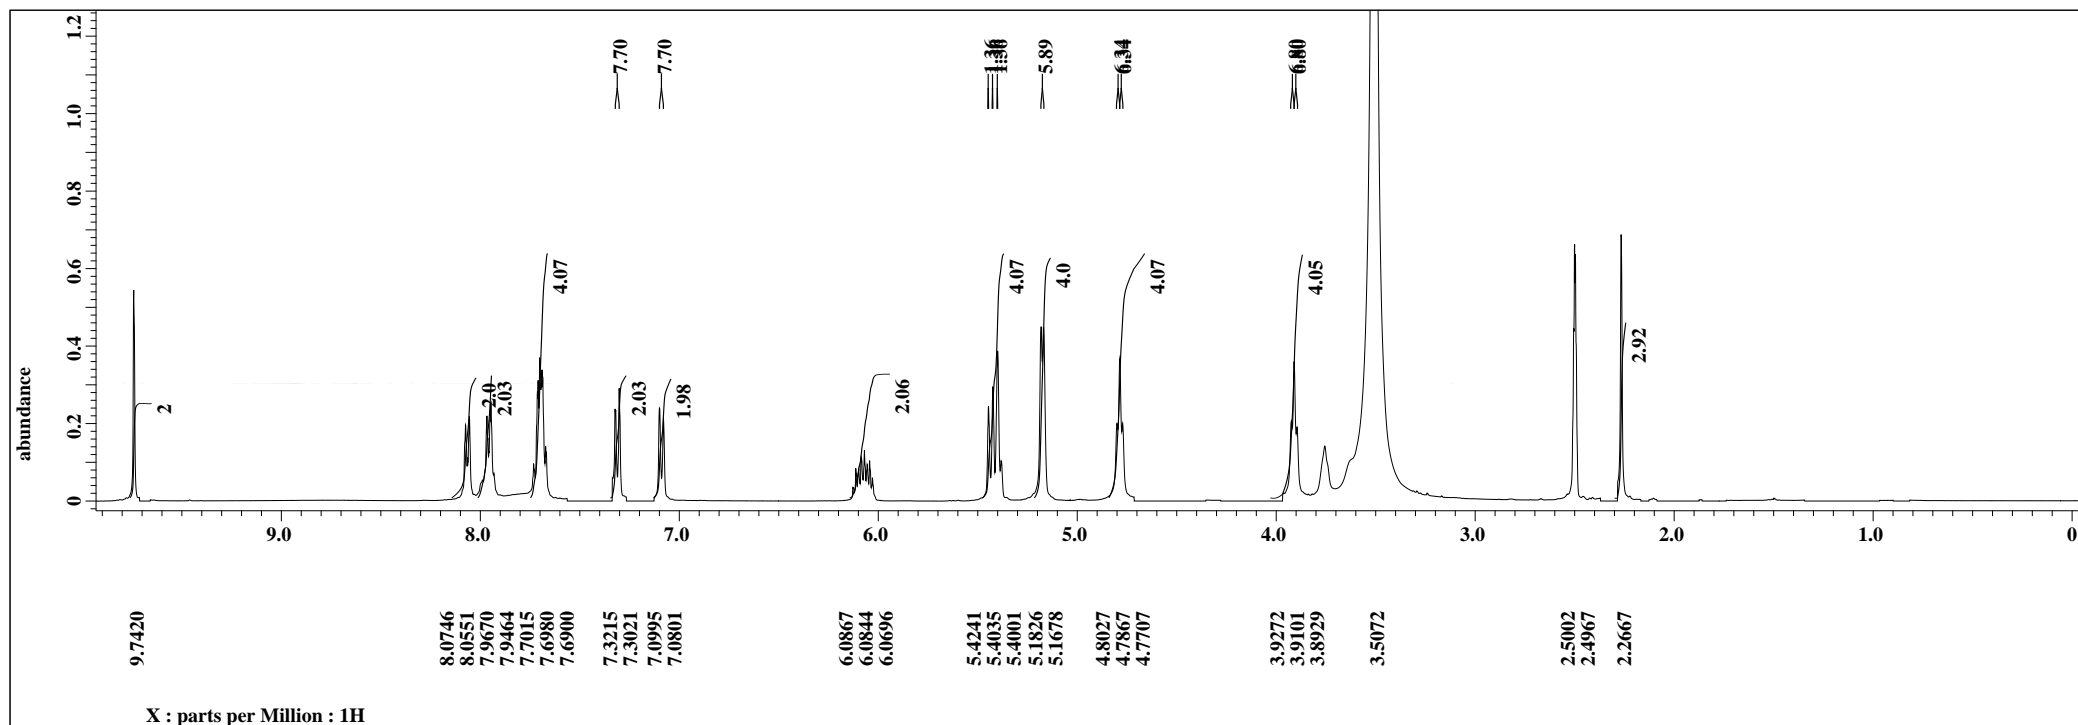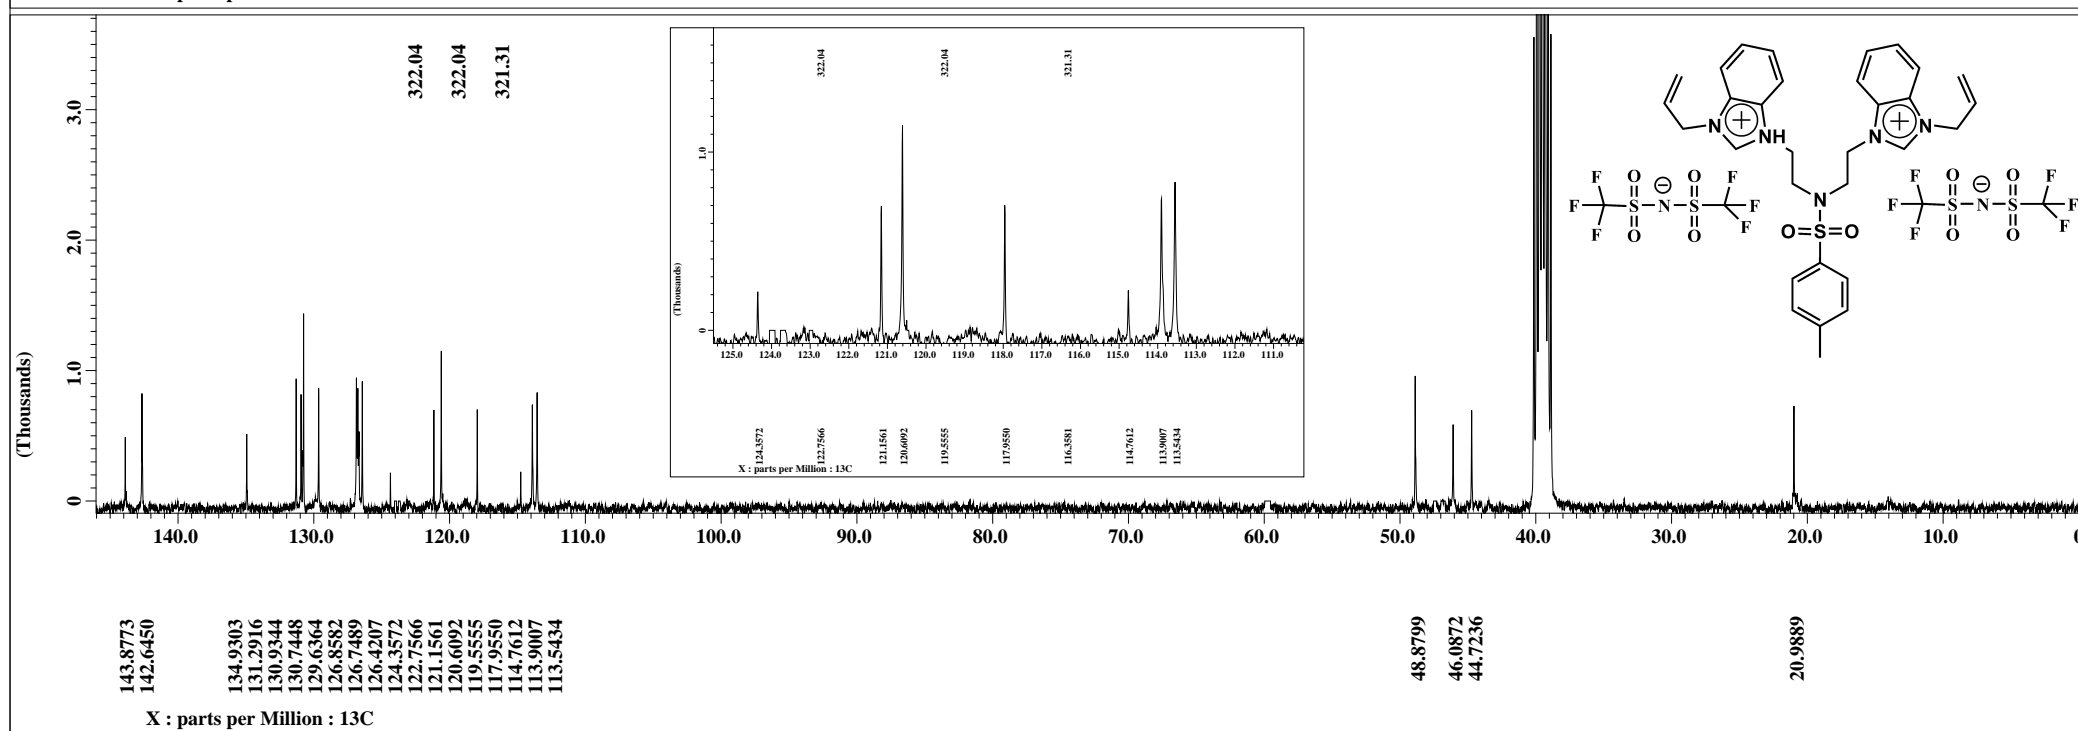

Figure S23-<sup>13</sup>C-NMR PENDANT of IL-8a (100 MHz, DMSO-*d*<sub>6</sub>)

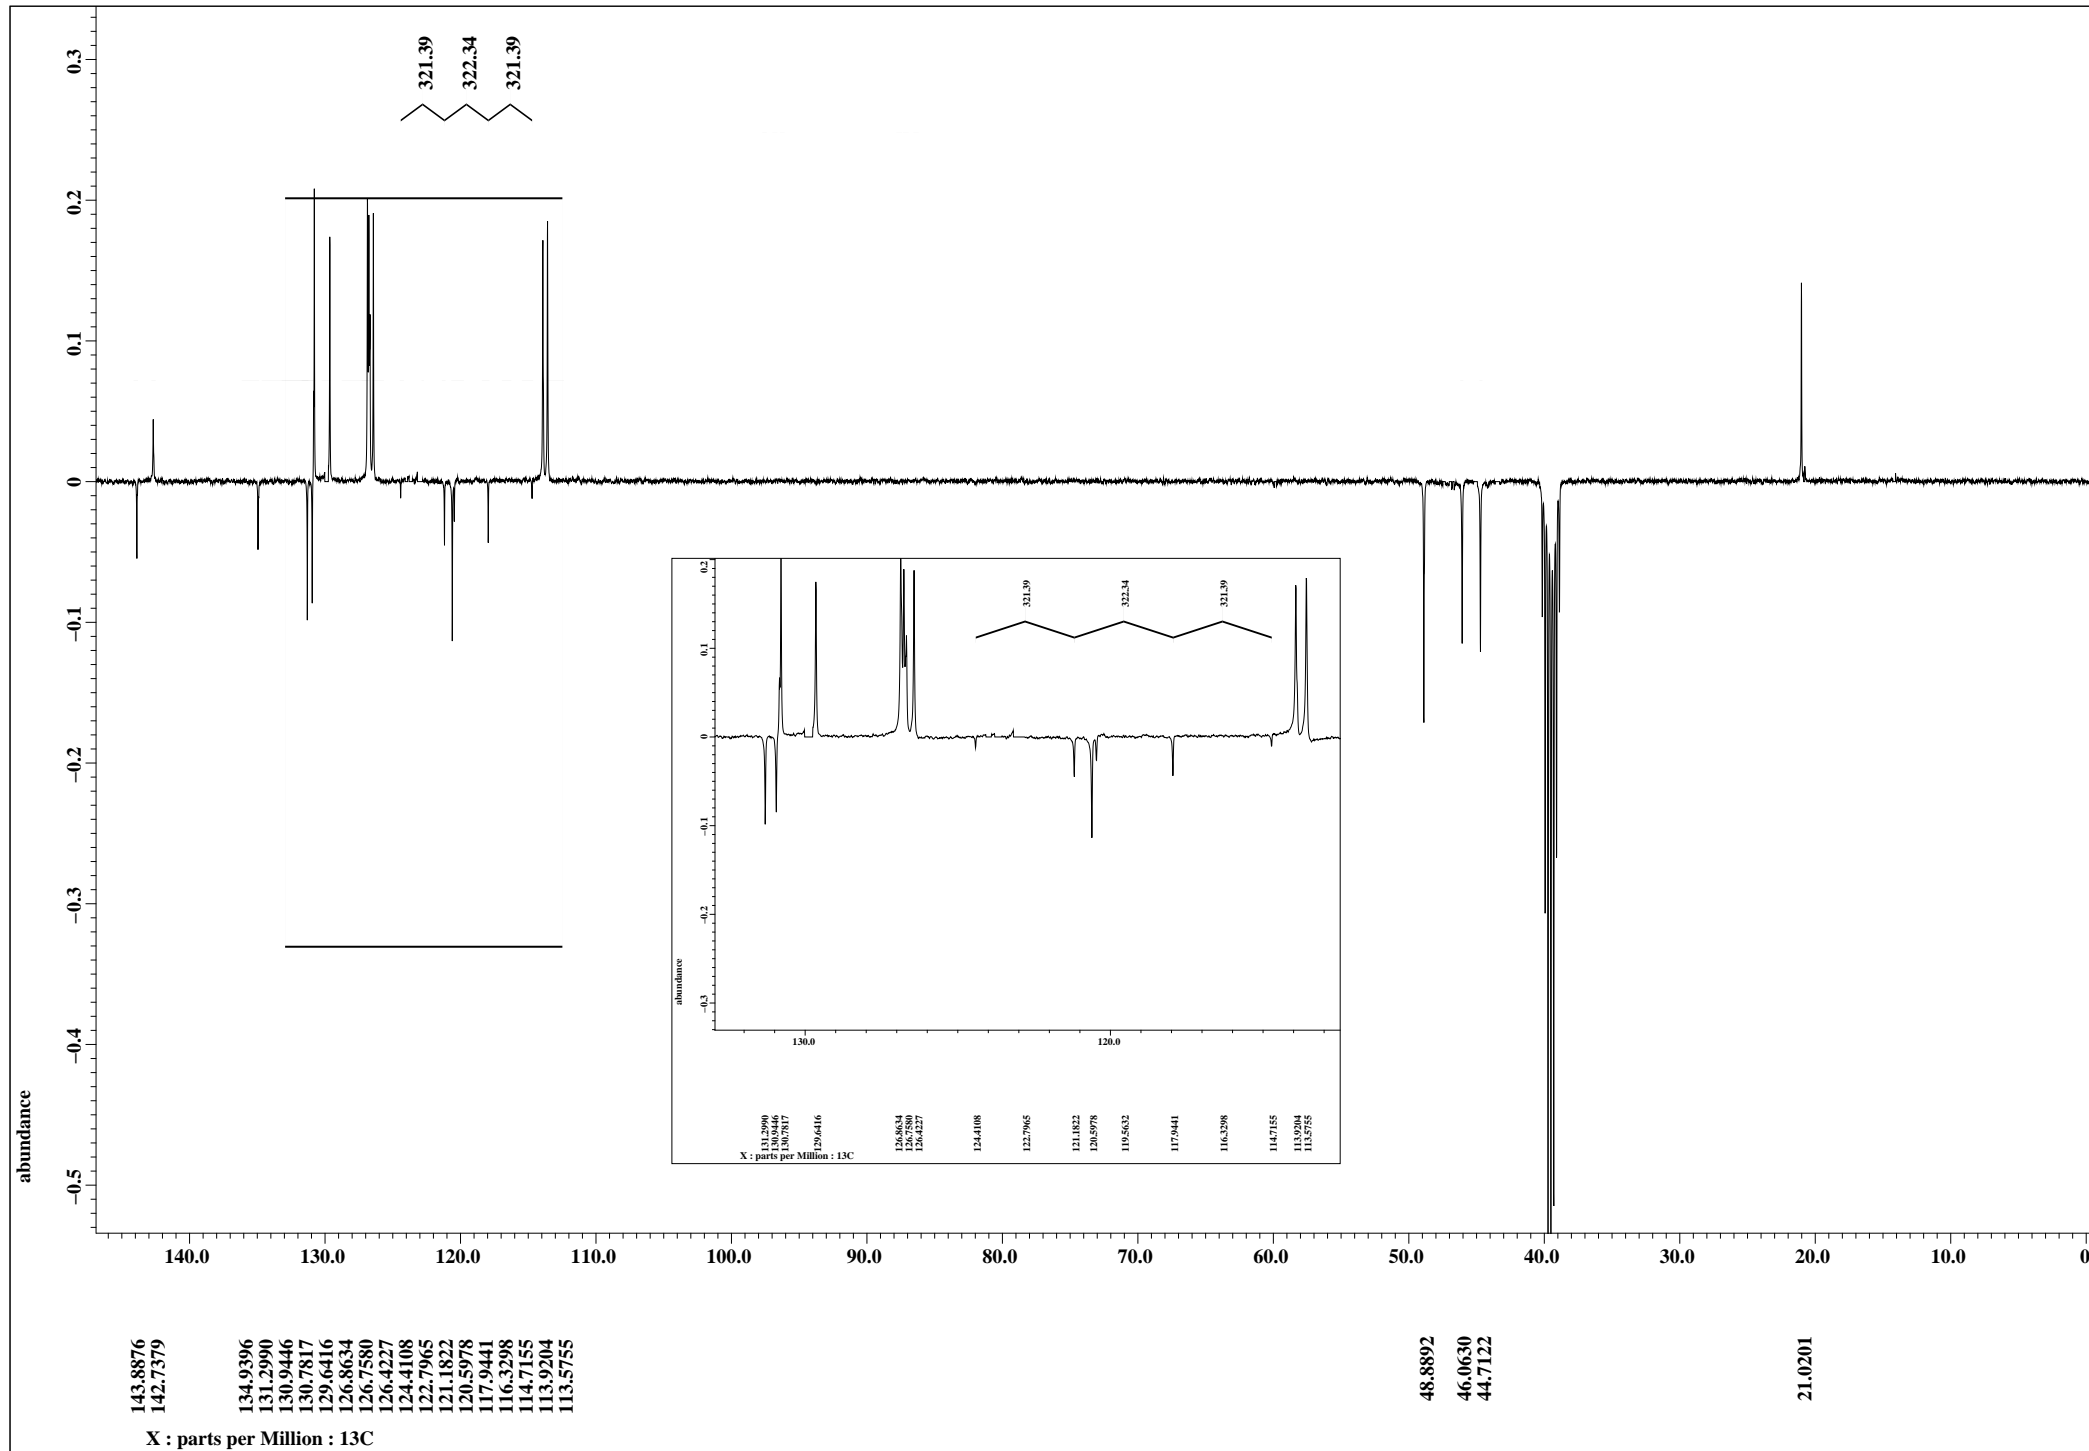

**Figure S24-** $^{19}\text{F}$ -NMR of IL-8a (336 MHz, DMSO- $d_6$ )

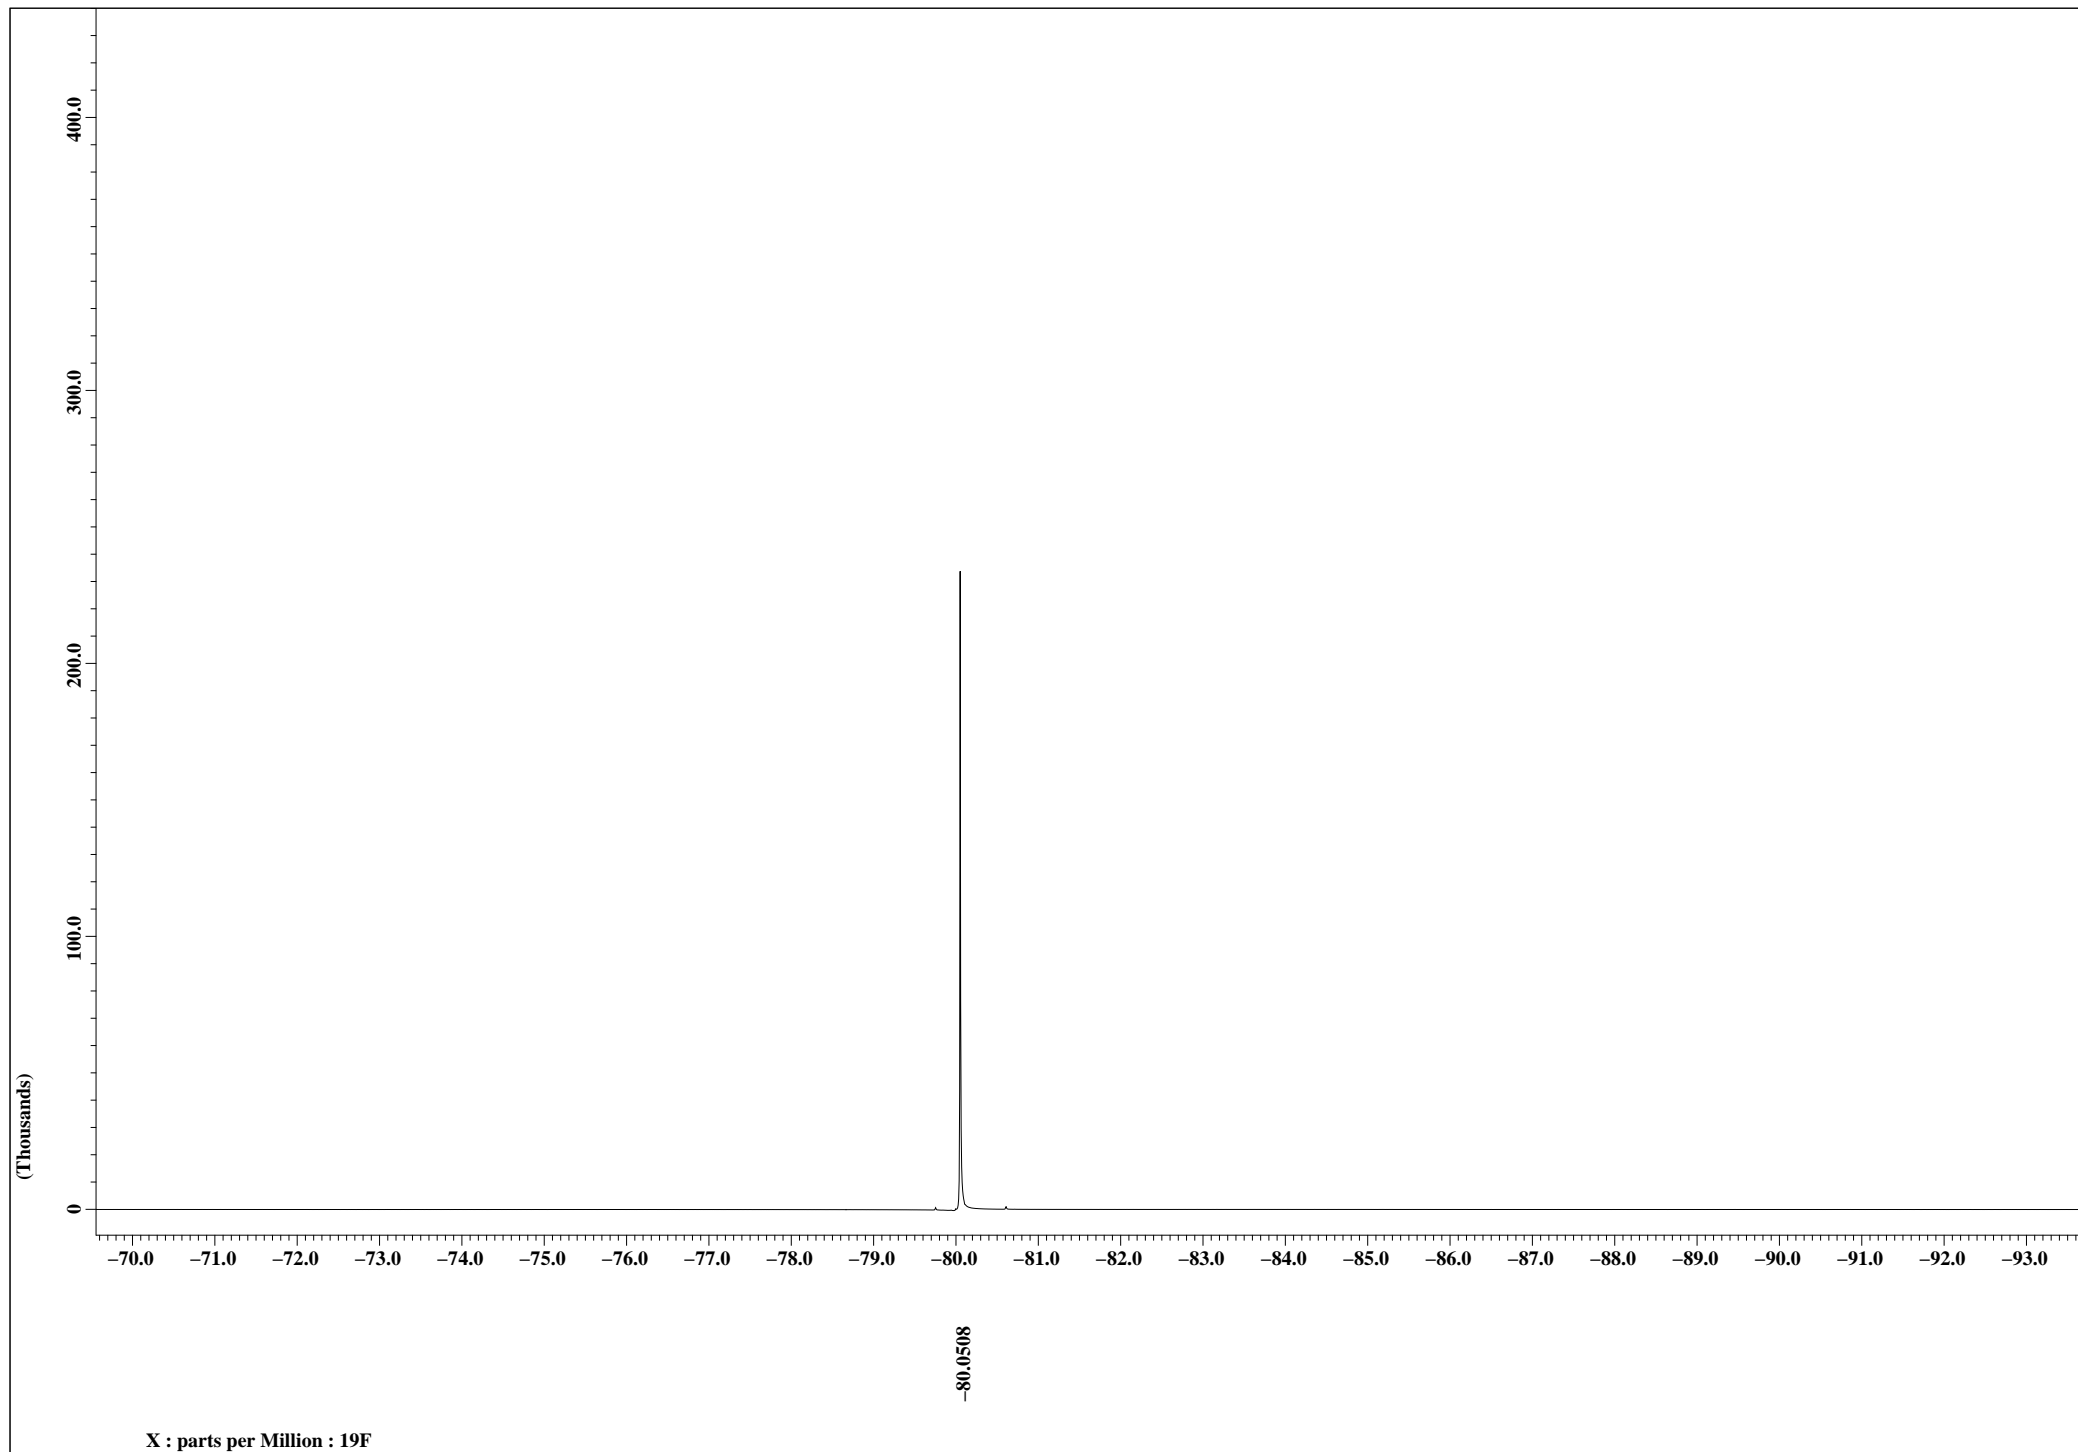



**Figure S25-<sup>1</sup>H & <sup>13</sup>C-NMR of IL-8d (400 MHz, DMSO-*d*<sub>6</sub>)**

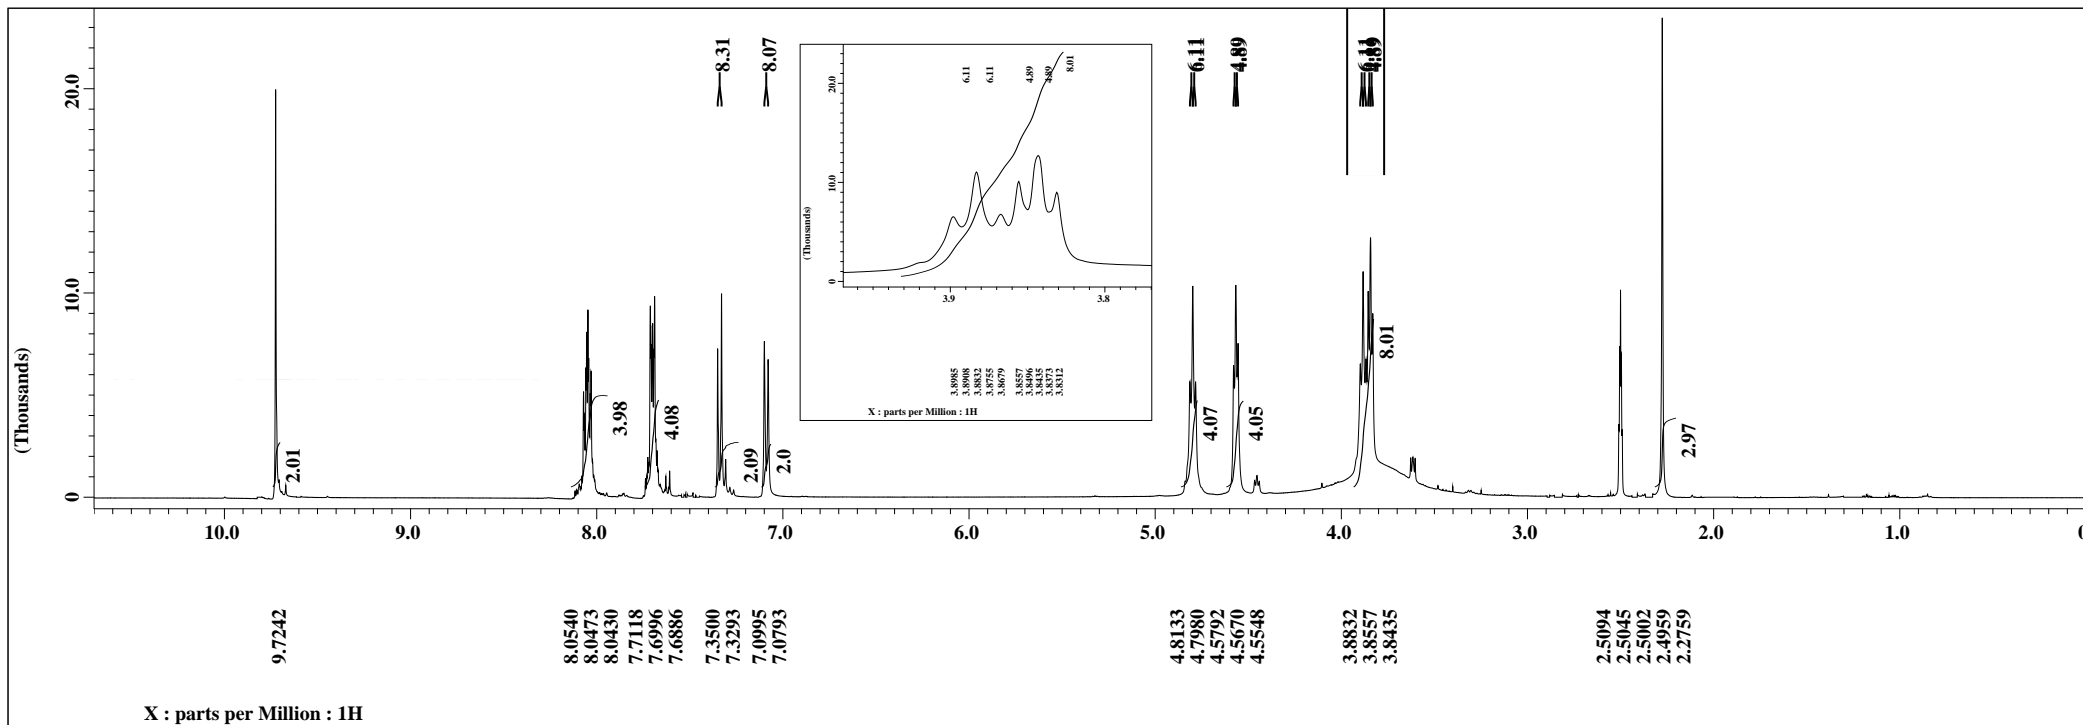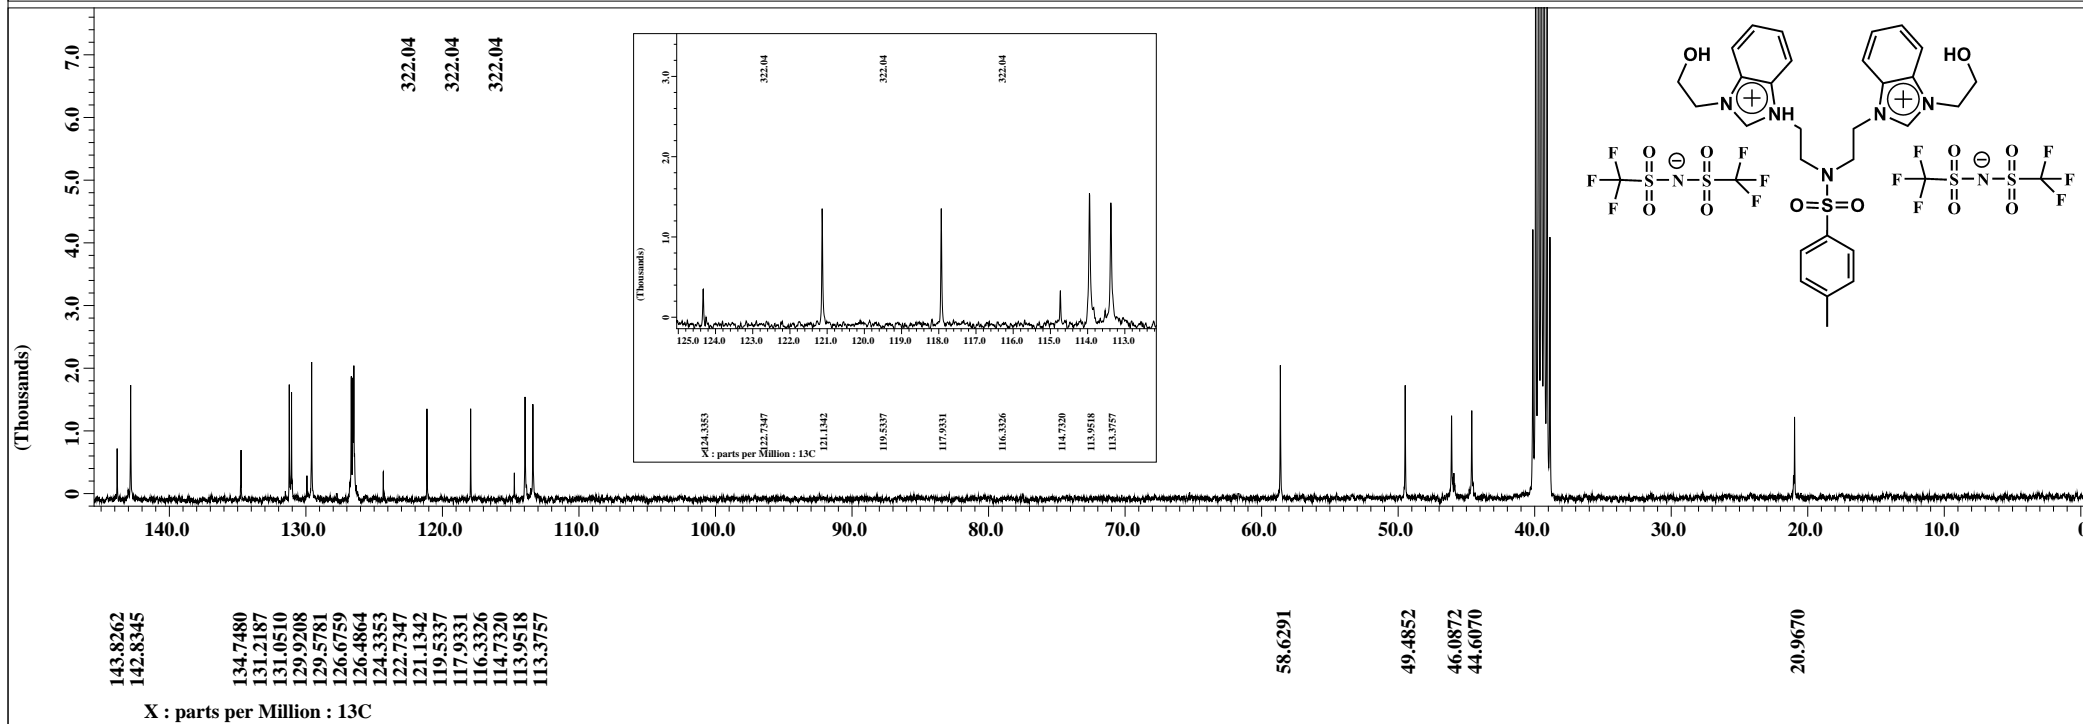

Figure S26-<sup>13</sup>C-NMR PENDANT of IL-8d (100 MHz, DMSO-*d*<sub>6</sub>)

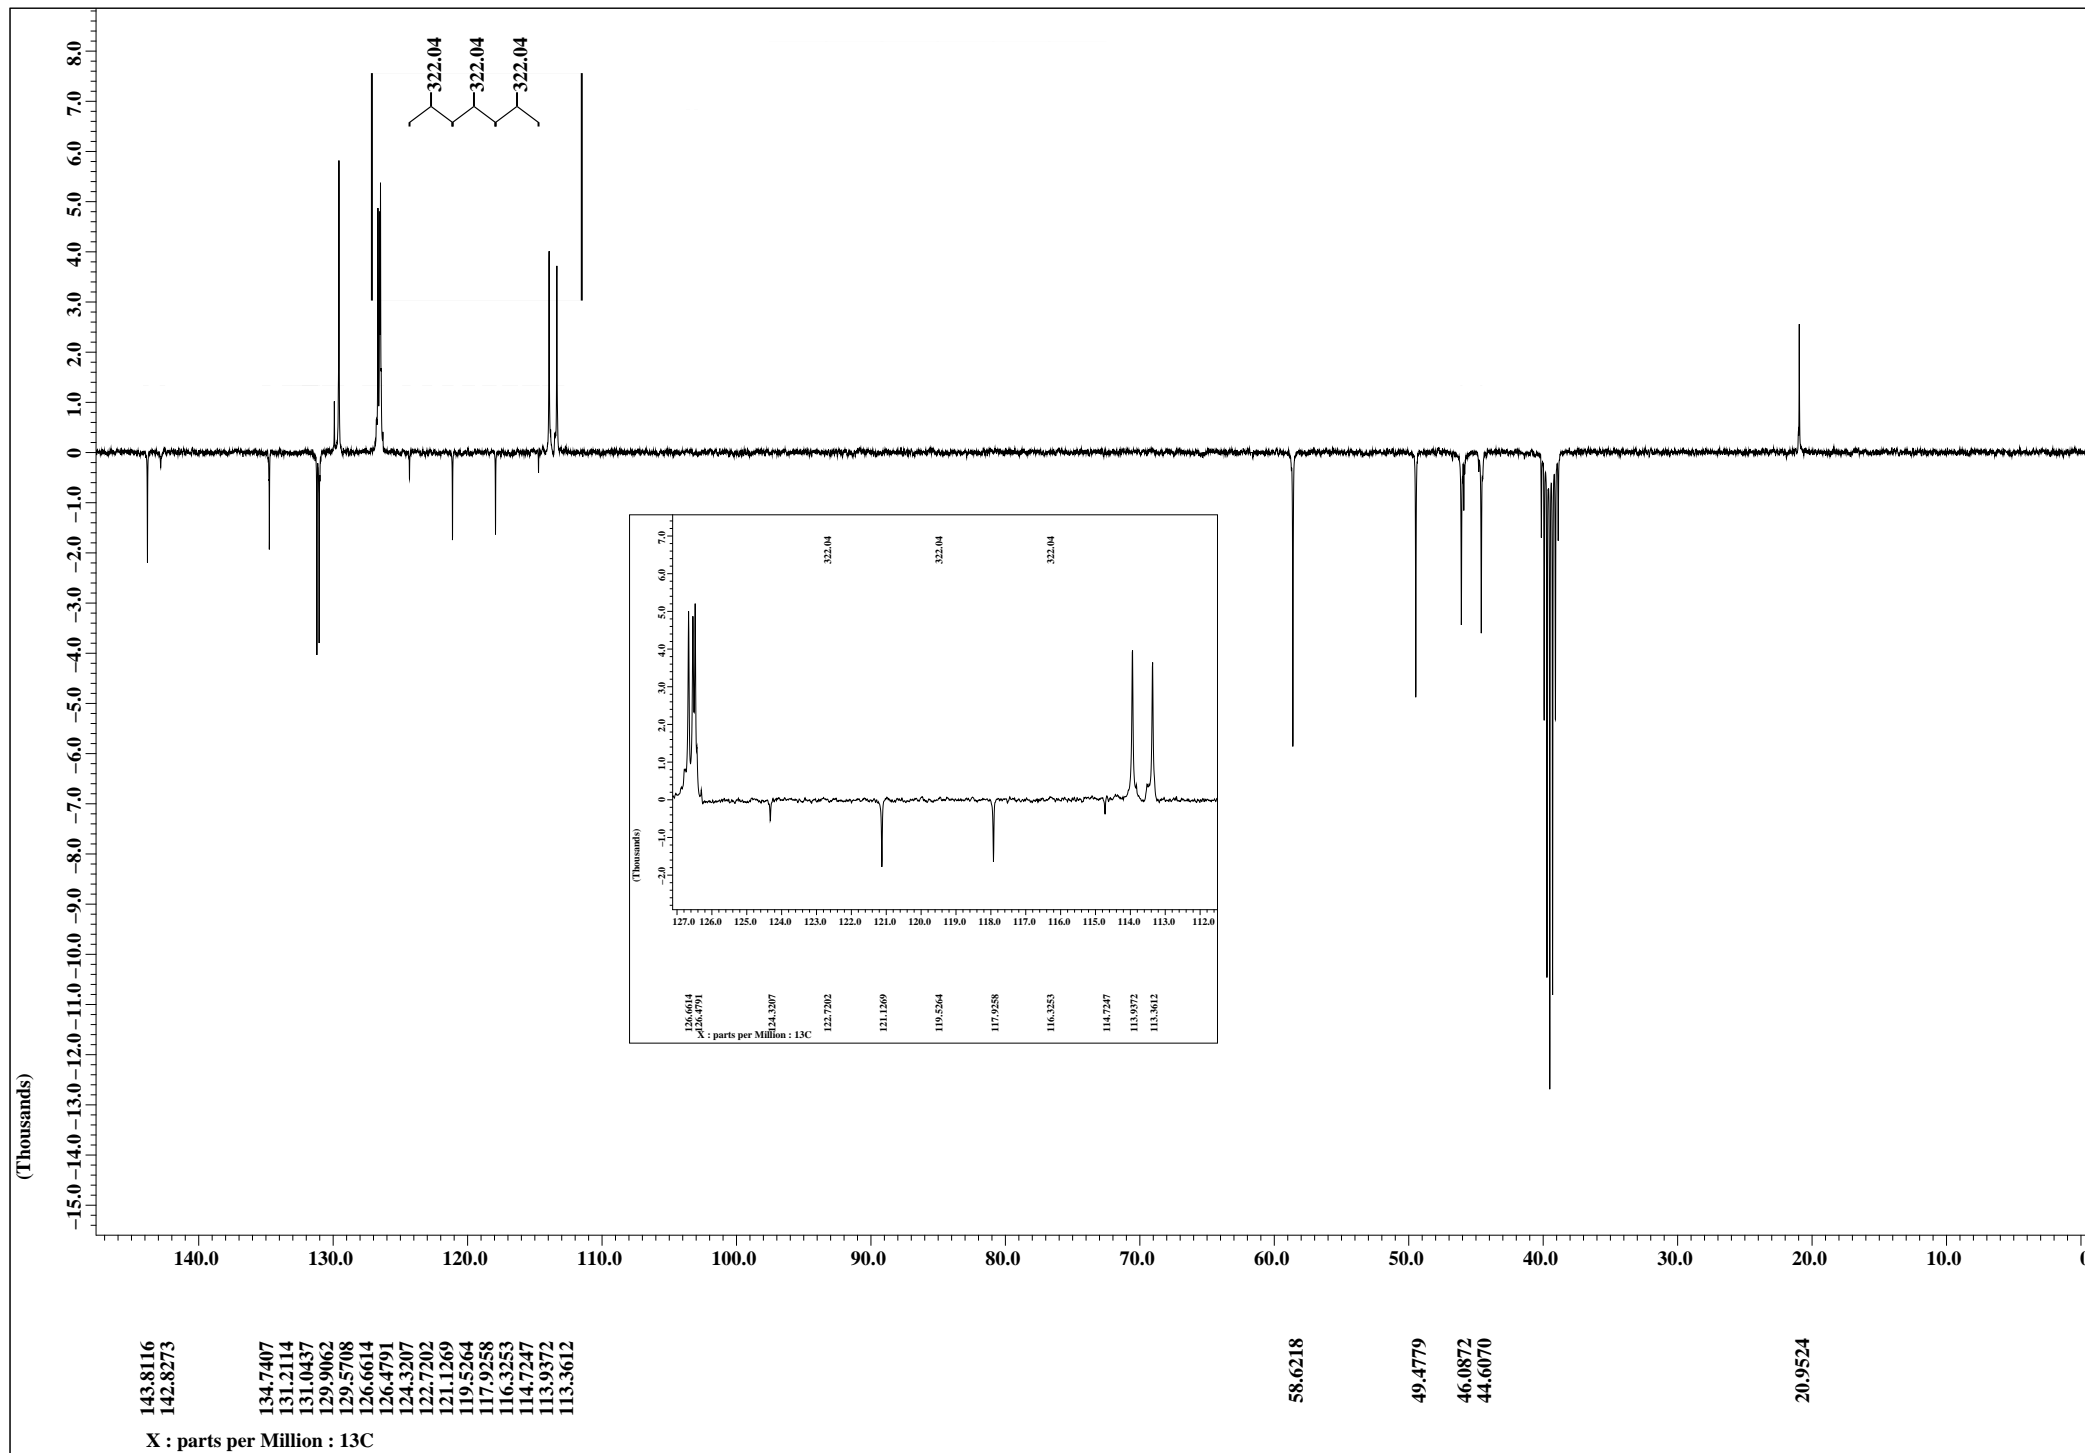

**Figure S27-** $^{19}\text{F}$ -NMR of IL-**8d** (336 MHz, DMSO- $d_6$ )

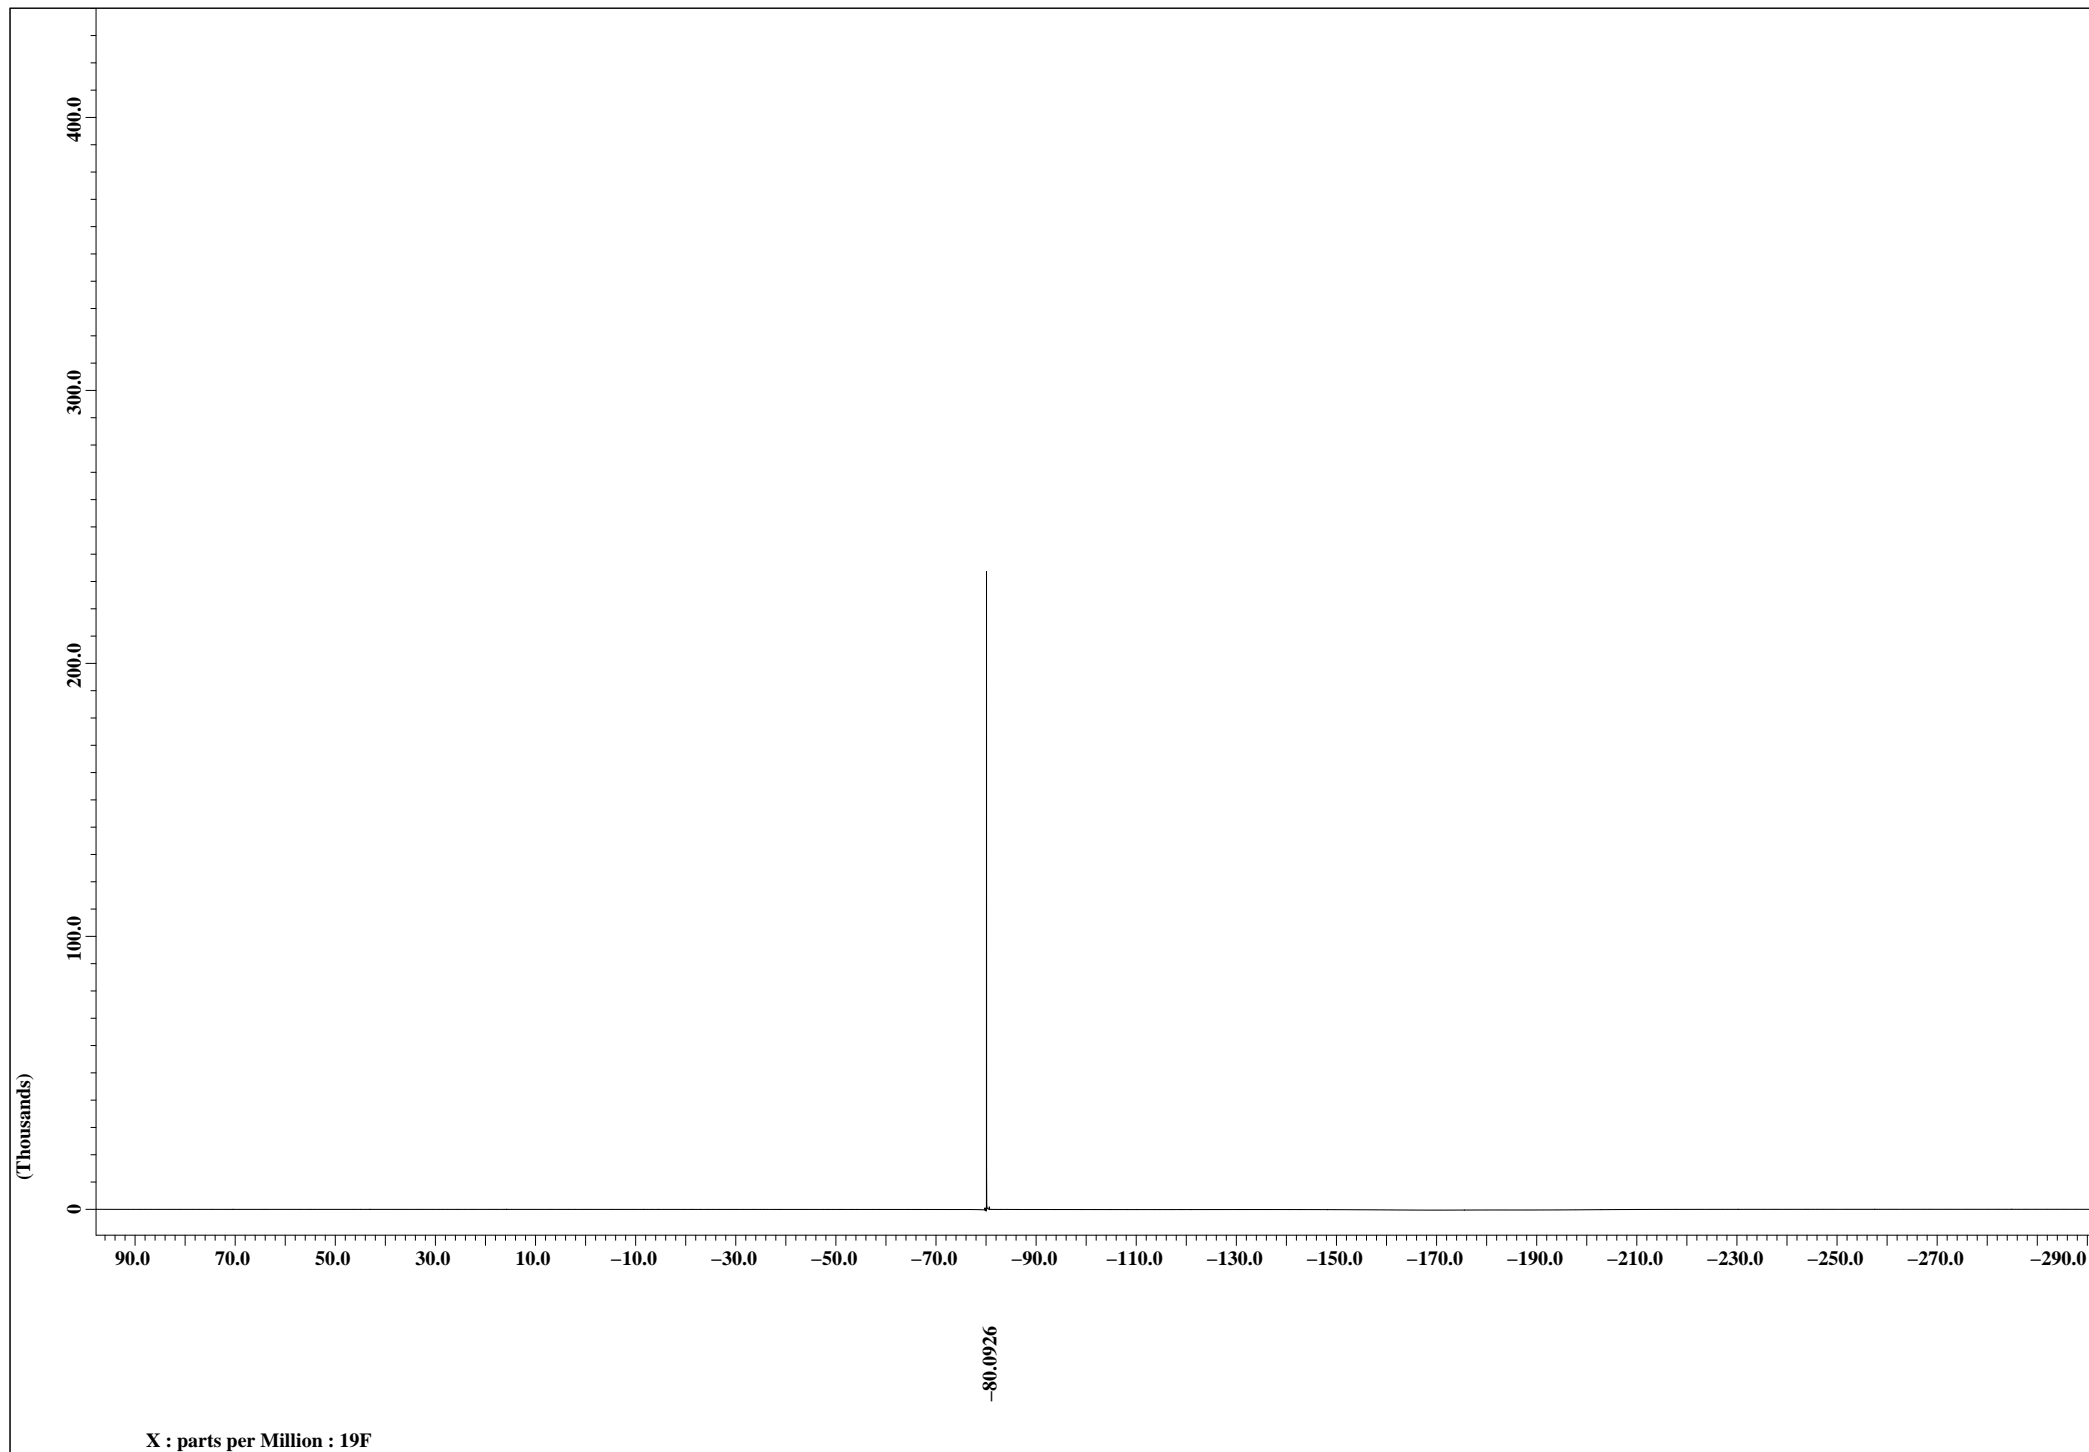

**Figure S28: HRMS of IL-5a.**

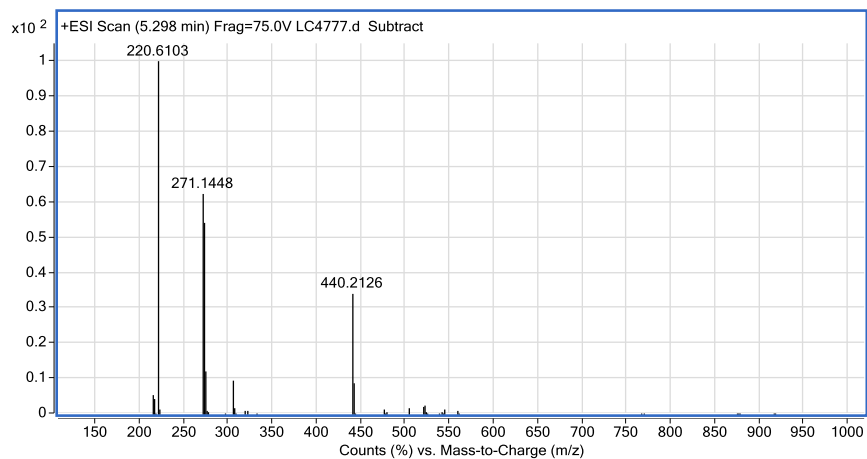

**Figure S29: HRMS of IL-5b.**

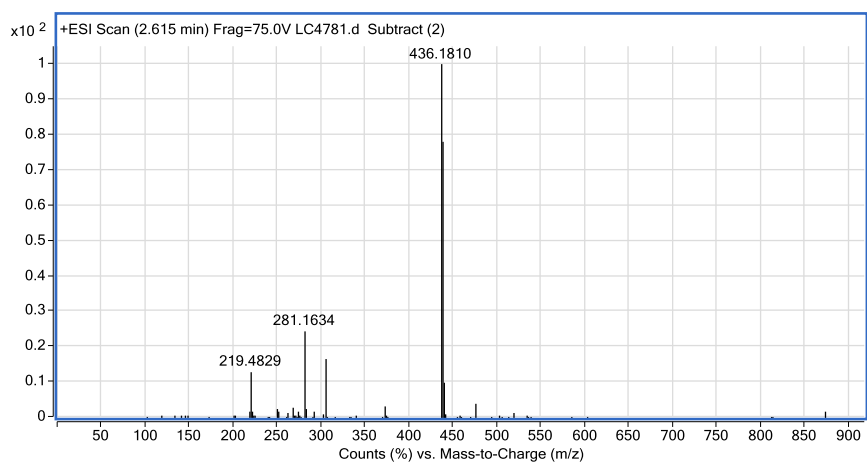

**Figure S30: HRMS of IL-5e.**

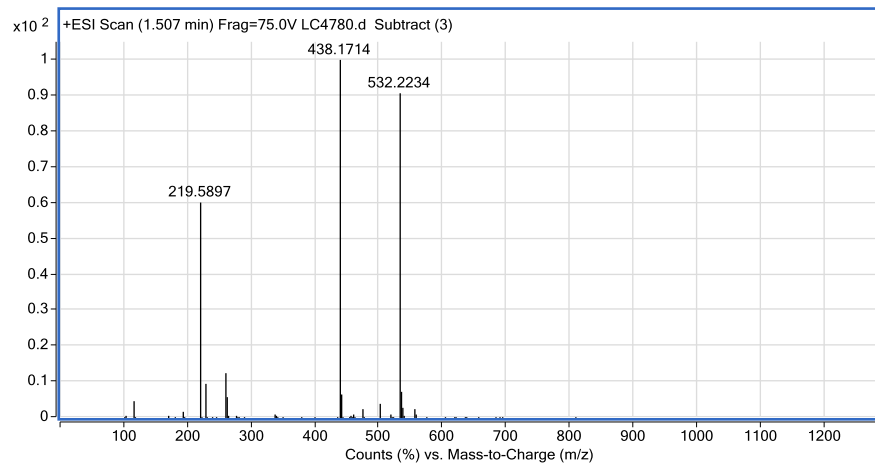

**Figure S31: HRMS of IL-6a.**

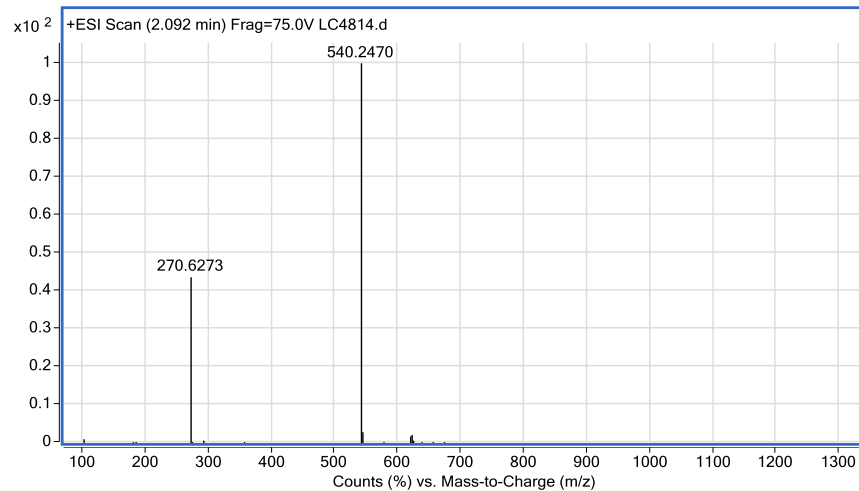

**Figure S32: HRMS of IL-6c.**

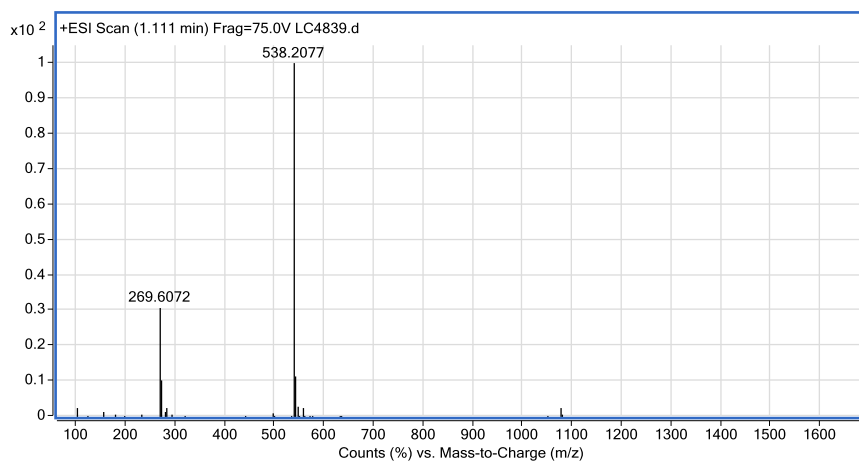

**Figure S33: HRMS of IL-6d.**

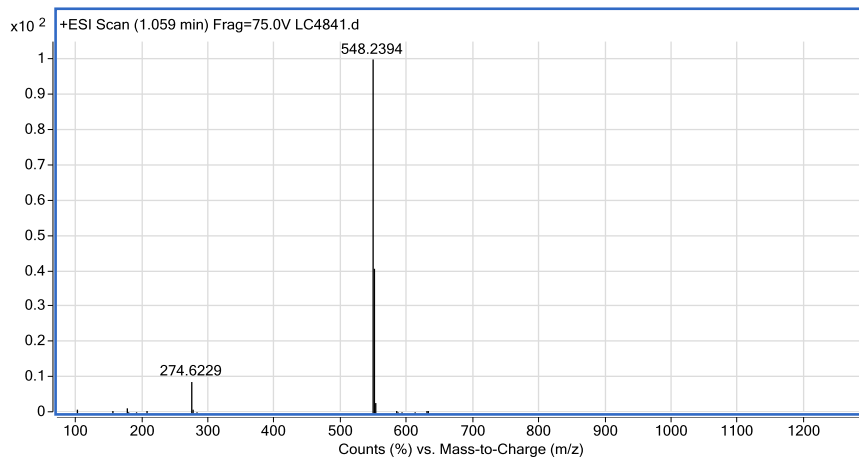

**Figure S34: HRMS of IL-6e.**

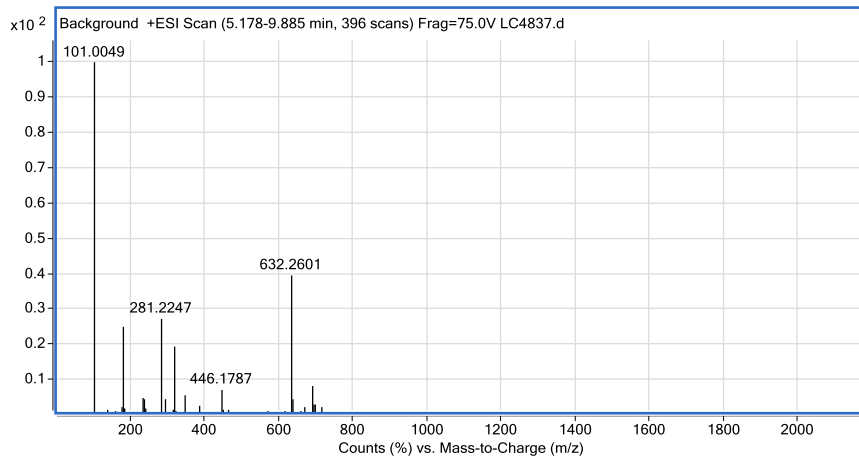

**Figure S35: Thermogravimetric analysis (TGA) curves of the thermal decomposition of IL-5a.**

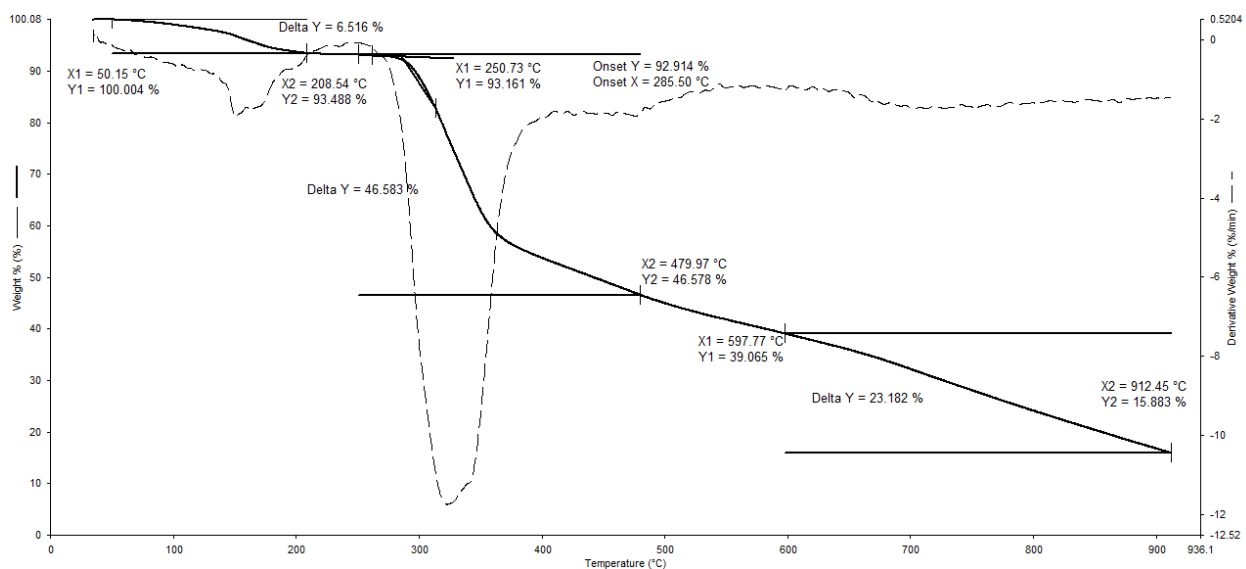

**Figure S36:** Thermogravimetric analysis (TGA) curves of the thermal decomposition of IL-5d.

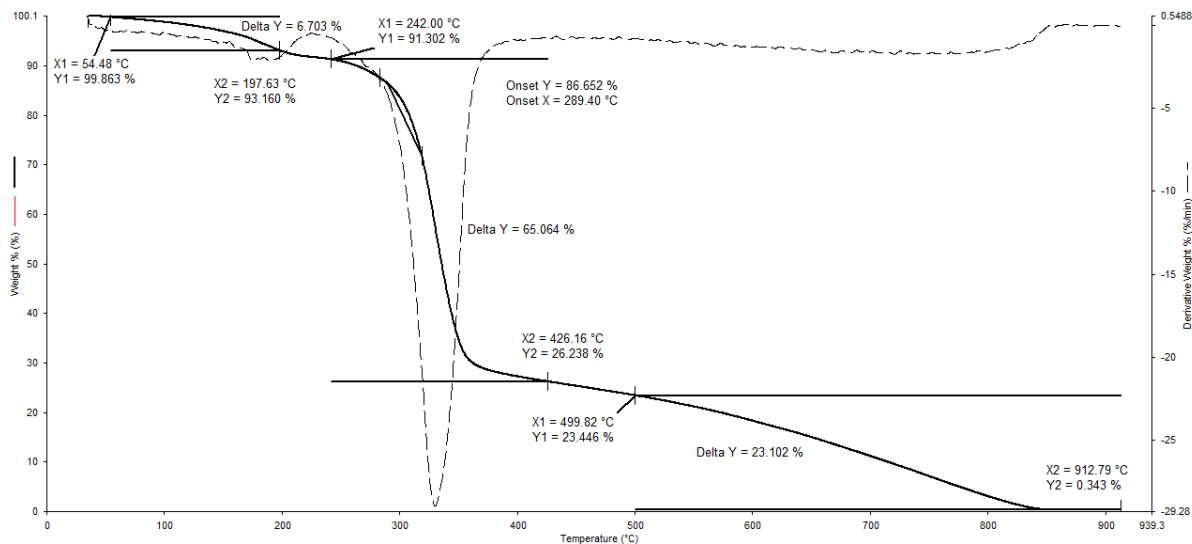

**Figure S37:** Thermogravimetric analysis (TGA) curves of the thermal decomposition of IL-6b.

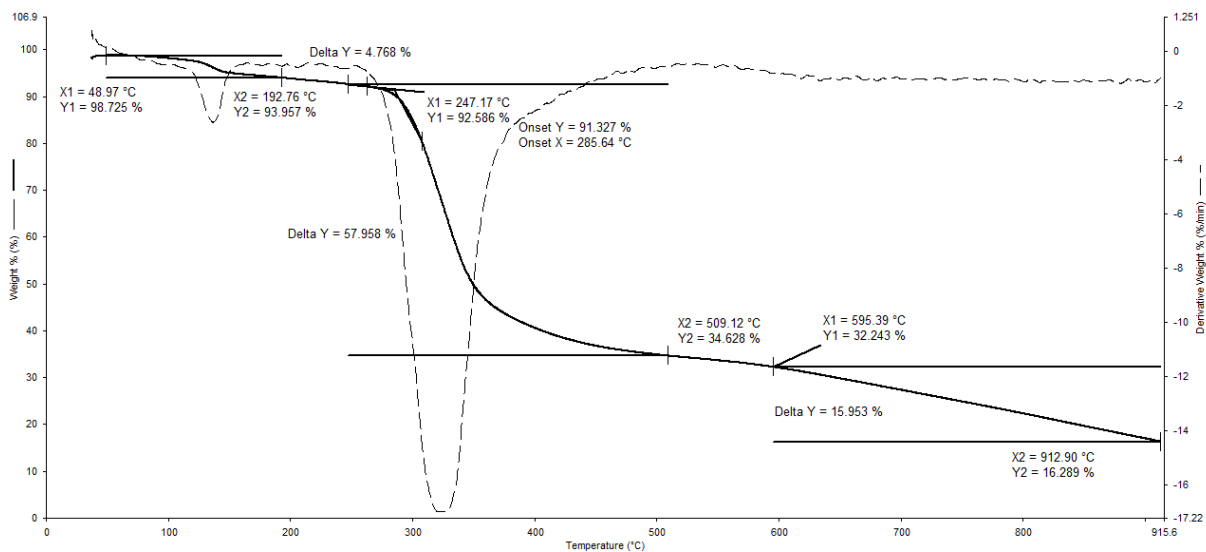

**Figure S38:** Thermogravimetric analysis (TGA) curves of the thermal decomposition of **IL-6c**.

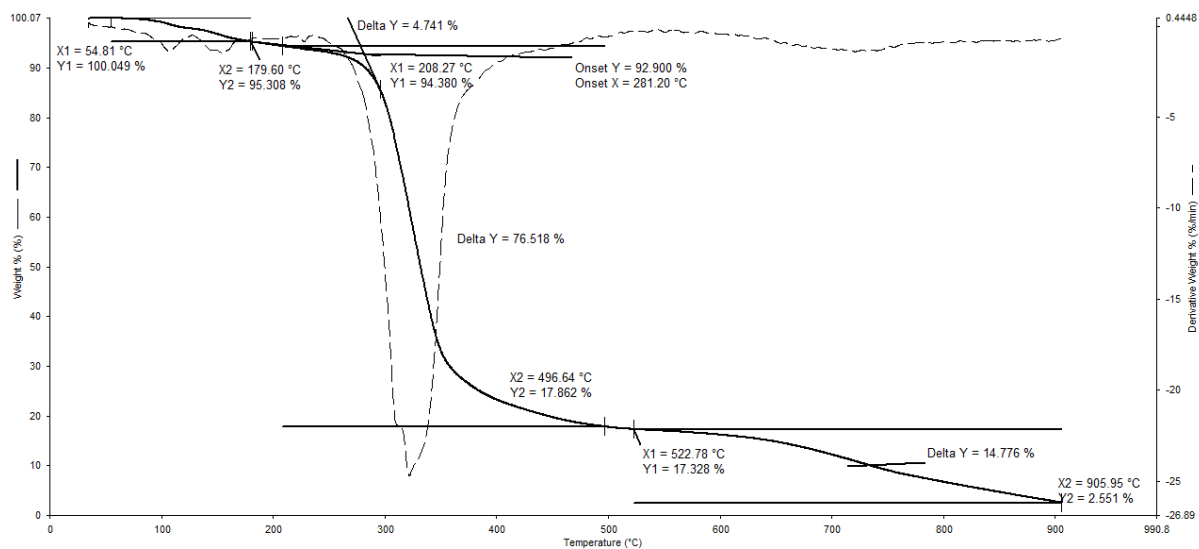

Supplement: c5ra13629f1.pdf [file c5ra13629f1.pdf]
